# Supplementary material for: Kinome chemoproteomics characterization of pyrrolo[3,4- c ]pyrazoles as potent and selective inhibitors of glycogen synthase kinase 3
Source: Royal Society of Chemistry journal article supplement (doi:10.1039/c7mo00006e), 2017-12-20
Supplement: c7mo00006e1.xlsx [file c7mo00006e1.xlsx]

## Sheet: Kinases_Non-Imputed
Protein IDs	Majority protein IDs	Protein names	Gene names	GOBP name	GOMF name	GOCC name	Pfam	Peptides	Unique peptides	Sequence coverage [%]	Unique sequence coverage [%]	Mol. weight [kDa]	Q-value	Score	Intensity	Log2 transformed and normalized MaxQuant protein intensity values for protein and lipid kinases identified in the dataset. Normalization was performed by substracting the median of each data column (entire dataset with kinases and non-kinases) from each value in that column.
																1_50 µM_Rep. 1	1_50 µM_Rep. 2	2_50 µM_Rep. 1	2_50 µM_Rep. 2	3_50 µM_Rep. 1	3_50 µM_Rep. 2	4_50 µM_Rep. 1	4_50 µM_Rep. 2	5_50 µM_Rep. 1	5_50 µM_Rep. 2	6_50 µM_Rep. 1	6_50 µM_Rep. 2	7_50 µM_Rep. 1	7_50 µM_Rep. 2	8_50 µM_Rep. 1	8_50 µM_Rep. 2	9_50 µM_Rep. 1	9_50 µM_Rep. 2	10_50 µM_Rep. 1	10_50 µM_Rep. 2	11_ 50 µM_Rep. 1	11_50 µM_Rep. 2	12_50 µM_Rep. 1	12_50 µM_Rep. 2	13_50 µM_Rep. 1	13_50 µM_Rep. 2	14_50 µM_Rep. 1	14_50 µM_Rep. 2	15_50 µM_Rep. 1	15_50 µM_Rep. 2	16_50 µM_Rep. 1	16_50 µM_Rep. 2	17_50 µM_Rep. 1	17_50 µM_Rep. 2
Q2M2I8;Q2M2I8-2;E9PG46;A0A096LP60	Q2M2I8;Q2M2I8-2;E9PG46	AP2-associated protein kinase 1	AAK1	biological regulation;cellular component organization;cellular component organization or biogenesis;cellular macromolecule metabolic process;cellular membrane organization;cellular metabolic process;cellular process;cellular protein metabolic process;endocytosis;establishment of localization;macromolecule metabolic process;macromolecule modification;membrane invagination;membrane organization;met…	adenyl nucleotide binding;adenyl ribonucleotide binding;AP-2 adaptor complex binding;ATP binding;binding;catalytic activity;kinase activity;Notch binding;nucleotide binding;phosphotransferase activity, alcohol group as acceptor;protein binding;protein complex binding;protein kinase activity;protein serine/threonine kinase activity;purine nucleotide binding;purine ribonucleoside triphosphate bindi…	axon part;cell leading edge;cell part;cell projection part;clathrin-coated vesicle;coated pit;coated vesicle;cytoplasmic membrane-bounded vesicle;cytoplasmic part;cytoplasmic vesicle;extrinsic to membrane;extrinsic to plasma membrane;intracellular membrane-bounded organelle;intracellular organelle;intracellular part;membrane part;membrane-bounded organelle;membrane-bounded vesicle;organelle;plasm…	Pkinase	75	63	71.3	63.1	103.88	0	323.31	543000000000	6.94979	7.28132	6.1659	6.85233	8.33839	8.49514	8.13006	8.02285	8.25223	8.37391	8.25505	8.16834	7.75011	8.16946	8.29994	8.11835	8.10095	8.1402	7.77774	7.57692	7.32017	6.97072	8.09981	7.97183	8.10872	8.40132	7.68967	7.8266	8.01225	7.86497	7.91906	8.04442	8.22852	8.43394
P00519-2;P00519;R4GRW0	P00519-2;P00519	Tyrosine-protein kinase ABL1	ABL1	actin cytoskeleton organization;actin filament branching;actin filament organization;actin filament-based process;activated T cell proliferation;activation of immune response;alpha-beta T cell activation;alpha-beta T cell differentiation;anatomical structure development;anatomical structure morphogenesis;antigen receptor-mediated signaling pathway;astrocyte differentiation;autophagy;axon guidance…	actin binding;actin monomer binding;adenyl nucleotide binding;adenyl ribonucleotide binding;adenylyltransferase activity;ATP binding;binding;catalytic activity;cation binding;cytoskeletal protein binding;DNA binding;enzyme binding;ion binding;kinase activity;kinase binding;magnesium ion binding;manganese ion binding;metal ion binding;mitogen-activated protein kinase binding;nicotinate-nucleotide …	actin cytoskeleton;cell leading edge;cell part;cytoplasm;cytoplasmic part;cytoskeleton;cytosol;extrinsic to internal side of plasma membrane;extrinsic to membrane;extrinsic to plasma membrane;intracellular membrane-bounded organelle;intracellular non-membrane-bounded organelle;intracellular organelle;intracellular organelle part;intracellular part;membrane;membrane part;membrane-bounded organelle…	F_actin_bind;Pkinase_Tyr;SH2;SH3_1	43	34	49.5	44.4	124.95	0	323.31	14822000000	0.845573	1.48801	1.03672	1.1502	3.76509	3.70481	3.13687	3.53605	3.18996	3.10654	3.14965	3.36565	2.91514	3.40863	3.9023	3.47048	3.43377	3.07863	3.44687	3.26883	1.61854	1.83061	3.50995	3.57394	3.66809	2.94995	3.00751	2.89275	4.02855	3.03579	3.12506	3.20134	2.30134	2.68539
P42684-6;P42684-7;P42684-8	P42684-6;P42684-7;P42684-8	Abelson tyrosine-protein kinase 2	ABL2	actin cytoskeleton organization;actin filament bundle assembly;actin filament organization;actin filament-based process;alpha-beta T cell activation;alpha-beta T cell differentiation;anatomical structure morphogenesis;associative learning;astrocyte differentiation;axon guidance;behavior;Bergmann glial cell differentiation;biological regulation;calcium ion homeostasis;cation homeostasis;cell activ…	actin binding;actin filament binding;actin monomer binding;adenyl nucleotide binding;adenyl ribonucleotide binding;ATP binding;binding;catalytic activity;cation binding;cytoskeletal protein binding;ion binding;kinase activity;magnesium ion binding;manganese ion binding;metal ion binding;non-membrane spanning protein tyrosine kinase activity;nucleotide binding;phosphotransferase activity, alcohol …	actin cytoskeleton;cell part;cell projection;cell projection part;cytoplasmic part;cytoskeleton;cytosol;dendritic spine;extrinsic to internal side of plasma membrane;extrinsic to membrane;extrinsic to plasma membrane;intracellular non-membrane-bounded organelle;intracellular organelle;intracellular part;lamellipodium;membrane part;neuron projection;neuron spine;non-membrane-bounded organelle;orga…	F_actin_bind;Pkinase_Tyr;SH2;SH3_1	62	1	61.6	2.8	126.22	0	323.31	63954000000	3.94525	4.27293	3.37689	4.26618	5.16306	5.49319	5.38648	5.17017	4.95835	5.48141	4.70888	5.47487	4.88768	5.15511	5.44253	5.61869	5.20169	5.1261	5.05557	5.13798	4.55119	4.3204	5.19589	5.25874	5.05093	5.32231	4.60402	5.67997	5.19483	5.33683	5.02474	5.27778	3.09584	4.32369
Q04771;C9JHJ7;C9J1R3;F5GY91;E7EN07;G3V1W8;P37023;F8W0N2	Q04771	Activin receptor type-1	ACVR1	activin receptor signaling pathway;acute inflammatory response;ameboidal cell migration;anatomical structure development;anatomical structure formation involved in morphogenesis;anatomical structure maturation;anatomical structure morphogenesis;angiogenesis;artery development;atrial septum morphogenesis;atrial septum primum morphogenesis;biological regulation;blood circulation;blood vessel develo…	activin binding;activin receptor activity, type I;activin-activated receptor activity;adenyl nucleotide binding;adenyl ribonucleotide binding;ATP binding;binding;catalytic activity;cation binding;cytokine binding;enzyme binding;growth factor binding;hormone binding;identical protein binding;ion binding;kinase activity;kinase binding;metal ion binding;molecular transducer activity;nucleotide bindi…	activin receptor complex;apical part of cell;cell body;cell part;cell projection;cell surface;dendrite;integral to membrane;integral to plasma membrane;intrinsic to membrane;intrinsic to plasma membrane;macromolecular complex;membrane;membrane part;neuron projection;neuronal cell body;plasma membrane part;protein complex;receptor complex	Activin_recp;Pkinase;TGF_beta_GS	24	23	57.2	55.8	57.152	0	191.75	26587000000	1.04566	1.37466	-2.80947	NaN	4.72323	4.99369	0.395718	0.172907	4.50583	4.79692	4.6209	4.76124	-1.12051	0.426655	0.158752	-0.926191	0.661552	0.122322	1.18781	-0.826809	-3.81343	-4.11076	-0.683525	-0.857628	1.43419	2.87106	2.79526	1.90027	3.23506	2.79772	3.17515	3.03642	-1.25148	-1.55545
P36896-5;P36896;P36896-4;P36896-2;P36896-3;F5H5Q2	P36896-5;P36896;P36896-4;P36896-2;P36896-3	Activin receptor type-1B	ACVR1B	activin receptor signaling pathway;anatomical structure development;biological regulation;cell cycle process;cell surface receptor linked signaling pathway;cellular macromolecule metabolic process;cellular metabolic process;cellular process;cellular protein metabolic process;cellular response to stimulus;central nervous system development;chordate embryonic development;development of primary fema…	activin receptor activity, type I;activin-activated receptor activity;adenyl nucleotide binding;adenyl ribonucleotide binding;ATP binding;binding;catalytic activity;cation binding;enzyme binding;inhibin binding;ion binding;kinase activity;metal ion binding;molecular transducer activity;nucleotide binding;phosphotransferase activity, alcohol group as acceptor;protein binding;protein kinase activit…	activin receptor complex;cell part;cell surface;extracellular membrane-bounded organelle;extracellular organelle;extracellular region part;extracellular vesicular exosome;integral to membrane;integral to plasma membrane;intrinsic to membrane;intrinsic to plasma membrane;macromolecular complex;membrane;membrane part;membrane-bounded organelle;membrane-bounded vesicle;organelle;plasma membrane;plas…	Activin_recp;Pkinase;TGF_beta_GS	20	14	44.6	36.9	51.724	0	308.55	10972000000	1.16785	1.83445	-0.563606	0.436554	3.53636	3.42861	1.69321	0.637699	3.52702	3.47749	3.45817	3.42924	-2.07494	-1.10702	0.846973	-0.267157	0.854565	0.198538	-3.60014	-1.74044	-1.39624	-1.19317	-1.07266	-0.612236	2.05291	2.14129	1.66482	1.81273	2.65116	0.831596	2.08861	2.46049	-1.57961	-2.16118
G3V426;Q86TW2-2;Q86TW2;F8W9Q8;G3V3J2;Q86TW2-3	G3V426;Q86TW2-2;Q86TW2;F8W9Q8	Uncharacterized aarF domain-containing protein kinase 1	ADCK1		adenyl nucleotide binding;adenyl ribonucleotide binding;ATP binding;binding;catalytic activity;kinase activity;nucleotide binding;phosphotransferase activity, alcohol group as acceptor;protein kinase activity;protein serine/threonine kinase activity;purine nucleotide binding;purine ribonucleoside triphosphate binding;purine ribonucleotide binding;ribonucleotide binding;transferase activity;transf…	cell part;cytoplasmic part;extracellular region;intracellular membrane-bounded organelle;intracellular organelle;intracellular part;membrane-bounded organelle;mitochondrion;organelle	ABC1	3	3	21.8	21.8	30.159	0.0018762	4.7826	274530000	NaN	NaN	NaN	NaN	-1.51945	-1.24485	NaN	NaN	-1.96986	-0.993166	-1.48728	-1.86529	NaN	NaN	NaN	NaN	-3.23847	NaN	-3.09405	NaN	NaN	NaN	-2.13809	-3.44525	-2.67492	NaN	NaN	NaN	-2.81166	NaN	-3.60191	NaN	-2.63419	-3.06348
P31749;P31749-2;A0A087WY56;G3V2I6;G3V4I6;G3V3X1;G3V3K5;Q9Y243-2;Q9Y243;J3KTC6;F8VS91	P31749;P31749-2	RAC-alpha serine/threonine-protein kinase	AKT1	activation-induced cell death of T cells;aging;alcohol metabolic process;amine metabolic process;aminoglycan metabolic process;anatomical structure development;apoptosis;apoptotic mitochondrial changes;biological regulation;biosynthetic process;blood coagulation;blood vessel development;carbohydrate biosynthetic process;carbohydrate homeostasis;carbohydrate metabolic process;carbohydrate transpor…	14-3-3 protein binding;adenyl nucleotide binding;adenyl ribonucleotide binding;ATP binding;binding;catalytic activity;enzyme binding;enzyme regulator activity;identical protein binding;kinase activity;lipid binding;nitric-oxide synthase regulator activity;nucleotide binding;phosphatidylinositol binding;phosphatidylinositol-3,4,5-trisphosphate binding;phosphatidylinositol-3,4-bisphosphate binding;…	cell junction;cell part;cell-cell junction;cytoplasm;cytoplasmic part;cytoskeletal part;cytoskeleton;cytosol;Golgi apparatus;intracellular membrane-bounded organelle;intracellular non-membrane-bounded organelle;intracellular organelle;intracellular organelle part;intracellular part;membrane;membrane-bounded organelle;microtubule cytoskeleton;mitochondrion;non-membrane-bounded organelle;nuclear pa…	PH;Pkinase;Pkinase_C	23	18	62.7	50.6	55.686	0	323.31	20315000000	2.10777	2.1225	1.39069	2.22871	3.7263	3.50019	3.75947	3.29016	3.30534	3.3624	3.43366	3.29269	3.35139	3.3563	3.97846	3.92581	3.7616	3.46656	3.68718	4.34798	3.27876	3.21137	3.73132	3.72686	3.89648	3.84737	3.09116	3.44526	4.28859	4.19724	3.66679	3.73911	3.36481	3.76
P31751;P31751-2;M0R0P9;J3QKW1;J3QLS6;C9JHS6;C9JIJ1;J3KRI8;A8MX96;E7EVP8;M0QZK3;C9JC83;A0A0A0MRF1;C9J258;J3KSY8;J3QL45;C9JIF6;M0R283;J3KTP4;M0QZW8;M0R275	P31751;P31751-2;M0R0P9	RAC-beta serine/threonine-protein kinase	AKT2	alcohol metabolic process;apoptosis;biological regulation;biosynthetic process;carbohydrate biosynthetic process;carbohydrate metabolic process;carbohydrate transport;cell death;cell differentiation;cell surface receptor linked signaling pathway;cellular biosynthetic process;cellular carbohydrate biosynthetic process;cellular carbohydrate metabolic process;cellular component organization;cellular…	adenyl nucleotide binding;adenyl ribonucleotide binding;ATP binding;binding;catalytic activity;kinase activity;nucleotide binding;phosphotransferase activity, alcohol group as acceptor;protein kinase activity;protein serine/threonine kinase activity;purine nucleotide binding;purine ribonucleoside triphosphate binding;purine ribonucleotide binding;ribonucleotide binding;transferase activity;transf…	cell cortex;cell part;cell projection membrane;cell projection part;cytoplasmic part;cytosol;intracellular membrane-bounded organelle;intracellular organelle;intracellular organelle part;intracellular part;leading edge membrane;membrane;membrane part;membrane-bounded organelle;nuclear part;nucleoplasm;nucleus;organelle;organelle part;plasma membrane;plasma membrane part;ruffle membrane	PH;Pkinase;Pkinase_C	20	15	49.5	35.8	55.768	0	61.113	4202200000	-1.18674	-1.27986	-2.05029	-1.51894	1.73376	2.20703	1.51776	1.35837	1.34094	1.80251	0.828106	1.45838	0.263195	0.378788	1.1661	0.651024	1.03371	1.28435	0.963255	1.44484	0.861101	0.386053	0.777411	1.01743	0.904045	1.10256	-0.553764	-0.177347	1.13053	1.20593	0.276207	1.36591	1.11076	2.432
O14965;A3KFJ0;Q5QPD4;A3KFJ1;Q5QPD2;Q5QPD1;A3KFJ2;B4DXA6	O14965;A3KFJ0;Q5QPD4	Aurora kinase A	AURKA	anaphase-promoting complex-dependent proteasomal ubiquitin-dependent protein catabolic process;anatomical structure development;anterior/posterior axis specification;axis specification;biological regulation;catabolic process;cell cycle;cell cycle phase;cell cycle process;cell development;cell division;cellular catabolic process;cellular component assembly;cellular component assembly at cellular l…	adenyl nucleotide binding;adenyl ribonucleotide binding;ATP binding;binding;catalytic activity;enzyme binding;histone kinase activity;histone serine kinase activity;kinase activity;kinase binding;nucleotide binding;phosphotransferase activity, alcohol group as acceptor;protein binding;protein kinase activity;protein kinase binding;protein serine/threonine kinase activity;protein serine/threonine/…	axon hillock;axon part;cell part;cell projection part;centrosome;chromosomal part;chromosome passenger complex;chromosome, centromeric region;condensed chromosome, centromeric region;condensed nuclear chromosome, centromeric region;cytoplasmic part;cytoskeletal part;cytoskeleton;cytosol;female germ cell nucleus;germ cell nucleus;germinal vesicle;intracellular membrane-bounded organelle;intracellu…	Pkinase	44	40	90.6	87.6	45.809	0	323.31	323150000000	6.06733	6.00012	5.24715	6.00898	8.13269	8.12192	7.31295	7.39618	7.85319	8.17049	7.78238	7.90558	7.28599	7.58564	7.60178	7.60838	7.20838	7.38421	7.10646	7.68983	6.7196	6.31209	7.37065	7.50444	6.98375	7.62997	7.20055	7.46712	7.56516	7.5179	7.07629	7.51618	6.65669	7.03112
Q96GD4;Q96GD4-5;J3KTD6;Q96GD4-2;J3KT86;Q96GD4-3;J3KRF8;A0A0A0MSY3;Q5Y191;Q9UQB9-2;Q9UQB9-3;Q9UQB9;M0QYK8	Q96GD4;Q96GD4-5;J3KTD6;Q96GD4-2;J3KT86	Aurora kinase B	AURKB	abscission;aging;anaphase-promoting complex-dependent proteasomal ubiquitin-dependent protein catabolic process;anatomical structure development;attachment of spindle microtubules to chromosome;attachment of spindle microtubules to kinetochore;biological regulation;catabolic process;cell cycle;cell cycle checkpoint;cell cycle phase;cell cycle process;cell development;cell proliferation;cellular c…	adenyl nucleotide binding;adenyl ribonucleotide binding;ATP binding;binding;catalytic activity;cation binding;histone kinase activity;histone serine kinase activity;ion binding;kinase activity;metal ion binding;nucleotide binding;phosphotransferase activity, alcohol group as acceptor;protein kinase activity;protein serine/threonine kinase activity;protein serine/threonine/tyrosine kinase activity…	cell part;centrosome;chromocenter;chromosomal part;chromosome;chromosome passenger complex;chromosome, centromeric region;condensed chromosome;condensed chromosome, centromeric region;condensed nuclear chromosome, centromeric region;cytoplasm;cytoplasmic part;cytoskeletal part;cytosol;intracellular membrane-bounded organelle;intracellular non-membrane-bounded organelle;intracellular organelle;int…	Pkinase	41	7	85.5	11.6	39.31	0	323.31	29686000000	1.94062	1.91538	1.78146	2.00656	4.38742	4.18646	4.68007	4.11462	4.2599	4.26511	4.41399	4.05935	3.87727	4.20694	4.40369	4.2635	4.3296	4.1068	4.45469	4.41094	3.69898	3.36557	4.31308	4.26963	4.30794	4.35689	3.66605	3.93324	4.76776	4.26009	4.19127	4.25894	3.97545	3.9991
M0R0W6;P30530-2;P30530	M0R0W6;P30530-2;P30530	Tyrosine-protein kinase receptor UFO	AXL	anatomical structure development;anatomical structure morphogenesis;apoptotic cell clearance;biological adhesion;biological regulation;blood vessel remodeling;cell activation;cell adhesion;cell communication;cell differentiation;cell maturation;cell migration;cell morphogenesis;cell morphogenesis involved in differentiation;cell motility;cell surface receptor linked signaling pathway;cell-substra…	adenyl nucleotide binding;adenyl ribonucleotide binding;ATP binding;binding;catalytic activity;kinase activity;lipid binding;molecular transducer activity;nucleotide binding;phosphatidylserine binding;phospholipid binding;phosphotransferase activity, alcohol group as acceptor;protein kinase activity;protein tyrosine kinase activity;purine nucleotide binding;purine ribonucleoside triphosphate bind…	cell part;cell surface;extracellular membrane-bounded organelle;extracellular organelle;extracellular region part;extracellular space;extracellular vesicular exosome;host cell part;host cell surface;integral to membrane;integral to plasma membrane;intrinsic to membrane;intrinsic to plasma membrane;membrane;membrane part;membrane-bounded organelle;membrane-bounded vesicle;organelle;other organism …	fn3;Pkinase_Tyr;V-set	8	6	21.9	19.5	69.23	0	50.295	1346100000	-4.27552	NaN	-3.98988	NaN	-1.80871	-1.38479	-0.434217	-0.650028	NaN	-1.08353	NaN	0.286892	0.385115	0.575867	0.513987	0.674057	0.808891	0.391068	0.951122	0.689333	0.207481	0.222977	0.992847	0.387083	0.387209	0.28508	0.247087	-0.958838	0.741331	0.754538	0.609693	0.842279	NaN	-0.94153
Q9UIG0-2;Q9UIG0	Q9UIG0-2;Q9UIG0	Tyrosine-protein kinase BAZ1B	BAZ1B	anatomical structure morphogenesis;biological regulation;biosynthetic process;cellular biosynthetic process;cellular component organization;cellular component organization at cellular level;cellular component organization or biogenesis;cellular component organization or biogenesis at cellular level;cellular macromolecule biosynthetic process;cellular macromolecule metabolic process;cellular metab…	acetylcholine receptor regulator activity;adenyl nucleotide binding;adenyl ribonucleotide binding;ATP binding;binding;catalytic activity;cation binding;chromatin binding;histone acetyl-lysine binding;histone binding;histone kinase activity;ion binding;kinase activity;metal ion binding;non-membrane spanning protein tyrosine kinase activity;nucleotide binding;phosphotransferase activity, alcohol gr…	cell part;centromeric heterochromatin;chromatin;chromosomal part;chromosome;condensed chromosome;heterochromatin;intracellular membrane-bounded organelle;intracellular non-membrane-bounded organelle;intracellular organelle;intracellular organelle part;intracellular part;membrane-bounded organelle;non-membrane-bounded organelle;nucleus;organelle;organelle part	Bromodomain;PHD;WAC_Acf1_DNA_bd;WHIM1;WHIM2;WHIM3	12	12	9.3	9.3	170.45	0	21.644	1756900000	-1.10357	-0.058506	1.31694	0.215876	-0.104816	0.183422	-2.36912	-1.19354	0.0190105	0.047987	0.00660515	0.0625725	-0.389381	0.484869	0.368774	0.282166	-1.02622	-0.536774	-1.25594	-0.28775	-0.946945	-0.224728	-1.00218	-0.320759	-1.04168	-0.221926	-0.992851	-0.213045	-1.02649	-0.356525	-1.12271	-0.438704	-0.346531	-0.0229111
Q9NSY1;Q9NSY1-2;Q9NSY1-3;K4DI97;H0Y9P1	Q9NSY1;Q9NSY1-2;Q9NSY1-3;K4DI97	BMP-2-inducible protein kinase	BMP2K	biological regulation;regulation of biological process;regulation of biomineral tissue development;regulation of bone mineralization;regulation of developmental process;regulation of multicellular organismal development;regulation of multicellular organismal process;regulation of ossification	adenyl nucleotide binding;adenyl ribonucleotide binding;ATP binding;binding;catalytic activity;enzyme regulator activity;kinase activity;nucleotide binding;phosphatase regulator activity;phosphotransferase activity, alcohol group as acceptor;protein kinase activity;protein serine/threonine kinase activity;purine nucleotide binding;purine ribonucleoside triphosphate binding;purine ribonucleotide b…	cell part;intracellular organelle part;intracellular part;nuclear part;nucleoplasm;organelle part	BMP2K_C;Pkinase	49	44	48.8	47.4	129.17	0	323.31	74363000000	3.47937	4.13091	2.92537	3.85766	5.55249	5.593	5.80272	5.23743	5.39005	5.58199	5.44245	5.29648	4.92315	5.33186	5.55683	5.24235	5.67737	5.22125	5.79131	5.49074	4.80468	4.14393	5.47733	5.4157	5.49068	5.30996	4.65676	4.77452	6.00986	5.34571	5.45711	5.33625	5.19721	5.58299
P36894	P36894	Bone morphogenetic protein receptor type-1A	BMPR1A	anatomical structure arrangement;anatomical structure development;anatomical structure formation involved in morphogenesis;anatomical structure morphogenesis;anatomical structure regression;anterior/posterior pattern specification;appendage morphogenesis;axis specification;biological regulation;BMP signaling pathway;cartilage development;cell development;cell surface receptor linked signaling pat…	adenyl nucleotide binding;adenyl ribonucleotide binding;ATP binding;binding;catalytic activity;cation binding;identical protein binding;ion binding;kinase activity;metal ion binding;molecular transducer activity;nucleic acid binding transcription factor activity;nucleotide binding;phosphotransferase activity, alcohol group as acceptor;protein binding;protein dimerization activity;protein homodime…	cell body;cell part;cell projection;dendrite;external side of plasma membrane;integral to membrane;intrinsic to membrane;membrane;membrane part;neuron projection;neuronal cell body;plasma membrane;plasma membrane part	Activin_recp;Pkinase;TGF_beta_GS	9	8	23.9	22.6	60.197	0	165.78	1485900000	NaN	NaN	NaN	NaN	0.763592	1.51892	NaN	NaN	-0.668562	1.50748	0.127594	-0.378866	-4.8856	NaN	NaN	NaN	NaN	NaN	NaN	NaN	NaN	NaN	NaN	NaN	-2.43469	-1.61866	-4.00024	-2.78192	-2.4161	-3.35024	-1.45678	-2.00841	-4.06236	-5.94996
Q8IWQ3-3;Q8IWQ3;Q8IWQ3-5;Q8IWQ3-2;Q8IWQ3-4;Q8IWQ3-6;H0YES6;K7EN26;E9PRY3;E9PPI2	Q8IWQ3-3;Q8IWQ3;Q8IWQ3-5;Q8IWQ3-2;Q8IWQ3-4;Q8IWQ3-6	Serine/threonine-protein kinase BRSK2	BRSK2	actin cytoskeleton organization;actin cytoskeleton reorganization;actin filament-based process;anatomical structure morphogenesis;apoptosis;apoptosis in response to endoplasmic reticulum stress;axonogenesis;biological regulation;cell cycle phase;cell cycle process;cell death;cell differentiation;cell division;cell part morphogenesis;cell projection morphogenesis;cell projection organization;cellu…	adenyl nucleotide binding;adenyl ribonucleotide binding;ATP binding;binding;catalytic activity;cation binding;ion binding;kinase activity;magnesium ion binding;metal ion binding;nucleotide binding;phosphotransferase activity, alcohol group as acceptor;protein kinase activity;protein serine/threonine kinase activity;purine nucleotide binding;purine ribonucleoside triphosphate binding;purine ribonu…	cell part;centrosome;cytoplasm;cytoplasmic part;cytoskeletal part;endoplasmic reticulum;intracellular membrane-bounded organelle;intracellular non-membrane-bounded organelle;intracellular organelle;intracellular organelle part;intracellular part;membrane-bounded organelle;microtubule organizing center;non-membrane-bounded organelle;nucleus;organelle;organelle part;perinuclear region of cytoplasm	Pkinase	10	9	22.3	21	74.74	0	182.87	2201500000	-1.58981	-0.946283	-4.72808	-1.27072	0.686626	0.775166	-1.20482	-1.08583	0.50609	0.510788	0.300266	0.385363	-1.50705	-2.6036	-1.24372	-1.87303	-2.48937	-2.09808	-1.82548	-1.32548	-1.57745	-1.80373	-1.27085	-0.182095	-1.59533	-1.30708	-0.360916	-0.839239	-0.384506	-0.627848	-0.659895	-1.10261	-2.32594	-1.46015
O43683-2;O43683-3;O43683	O43683-2;O43683-3;O43683	Mitotic checkpoint serine/threonine-protein kinase BUB1	BUB1	apoptosis;biological regulation;cell cycle;cell cycle checkpoint;cell cycle phase;cell cycle process;cell death;cell division;cell proliferation;cellular component organization;cellular component organization at cellular level;cellular component organization or biogenesis;cellular component organization or biogenesis at cellular level;cellular process;cellular response to stimulus;chromosome segr…	adenyl nucleotide binding;adenyl ribonucleotide binding;ATP binding;binding;catalytic activity;kinase activity;nucleotide binding;phosphotransferase activity, alcohol group as acceptor;protein kinase activity;protein serine/threonine kinase activity;purine nucleotide binding;purine ribonucleoside triphosphate binding;purine ribonucleotide binding;ribonucleotide binding;transferase activity;transf…	cell part;chromosomal part;condensed chromosome kinetochore;condensed chromosome outer kinetochore;condensed nuclear chromosome outer kinetochore;cytoplasm;cytoplasmic part;cytosol;intracellular non-membrane-bounded organelle;intracellular organelle;intracellular organelle part;intracellular part;kinetochore;macromolecular complex;membrane;non-membrane-bounded organelle;nuclear chromosome part;nu…	Mad3_BUB1_I;Pkinase	5	5	9.8	9.8	115.84	0.00076104	12.136	624260000	NaN	NaN	NaN	NaN	-1.40473	-3.06809	NaN	-0.809265	NaN	NaN	-2.53272	-2.68259	-0.779751	-0.231506	-0.500645	NaN	-0.978108	-0.837069	-0.963928	-0.0571156	0.381245	-2.51932	-1.17363	-0.256859	-1.07726	-1.60465	NaN	-0.271738	-1.69338	-0.739359	-0.825426	-0.601818	NaN	-3.90208
Q14012;C9JES6;H7C071;F8W6S9	Q14012	Calcium/calmodulin-dependent protein kinase type 1	CAMK1	biological regulation;cell cycle;cellular macromolecule metabolic process;cellular metabolic process;cellular process;cellular protein metabolic process;cellular response to stimulus;establishment of localization;establishment of localization in cell;intracellular transport;macromolecule metabolic process;macromolecule modification;metabolic process;negative regulation of binding;negative regulat…	adenyl nucleotide binding;adenyl ribonucleotide binding;ATP binding;binding;calmodulin-dependent protein kinase activity;catalytic activity;kinase activity;nucleotide binding;phosphotransferase activity, alcohol group as acceptor;protein kinase activity;protein serine/threonine kinase activity;purine nucleotide binding;purine ribonucleoside triphosphate binding;purine ribonucleotide binding;ribon…	cell part;cytoplasm;intracellular membrane-bounded organelle;intracellular organelle;intracellular part;membrane-bounded organelle;nucleus;organelle	Pkinase	21	18	68.1	60.8	41.337	0	88.655	6654600000	0.562239	0.265398	-0.295113	0.956011	1.98503	2.604	1.52098	1.44684	1.99461	2.21888	2.00921	2.09511	1.75797	1.90534	2.48879	1.63319	1.66319	1.44855	1.76055	1.49891	1.62651	1.30569	1.44744	1.39447	1.74161	1.43281	0.883425	0.85084	2.59989	1.82182	1.58111	1.51623	1.74166	2.21206
Q8IU85-2;Q8IU85;A0A087WUR6	Q8IU85-2;Q8IU85;A0A087WUR6	Calcium/calmodulin-dependent protein kinase type 1D	CAMK1D	biological regulation;defense response;inflammatory response;negative regulation of apoptosis;negative regulation of biological process;negative regulation of cell death;negative regulation of cellular process;negative regulation of programmed cell death;positive regulation of apoptosis;positive regulation of behavior;positive regulation of biological process;positive regulation of cell death;pos…	adenyl nucleotide binding;adenyl ribonucleotide binding;ATP binding;binding;calmodulin-dependent protein kinase activity;catalytic activity;kinase activity;nucleotide binding;phosphotransferase activity, alcohol group as acceptor;protein kinase activity;protein serine/threonine kinase activity;purine nucleotide binding;purine ribonucleoside triphosphate binding;purine ribonucleotide binding;ribon…	cell part;cytoplasm;intracellular membrane-bounded organelle;intracellular organelle;intracellular part;membrane-bounded organelle;nucleus;organelle	Pkinase	16	13	55.2	50.4	40.189	0	92.219	4125800000	-0.536812	0.285519	-1.59191	0.107782	1.14455	2.54932	1.05624	0.449852	0.84244	1.12429	1.51053	1.24617	0.52459	0.238504	1.04267	0.226212	1.29296	0.501224	0.578255	0.432251	0.284063	-0.14757	0.625172	1.18192	-0.547203	-0.0989361	0.754431	0.427038	1.43131	1.21067	0.975248	0.293598	1.48329	1.05463
Q9UQM7;Q9UQM7-2	Q9UQM7;Q9UQM7-2	Calcium/calmodulin-dependent protein kinase type II subunit alpha	CAMK2A	biological regulation;calcium ion transport;cation transport;cell communication;cell cycle process;cell surface receptor linked signaling pathway;cell-cell signaling;cellular macromolecule metabolic process;cellular metabolic process;cellular process;cellular protein metabolic process;cellular response to chemical stimulus;cellular response to cytokine stimulus;cellular response to heat;cellular …	adenyl nucleotide binding;adenyl ribonucleotide binding;ATP binding;binding;calmodulin binding;calmodulin-dependent protein kinase activity;catalytic activity;glutamate receptor binding;identical protein binding;kinase activity;nucleotide binding;phosphotransferase activity, alcohol group as acceptor;protein binding;protein dimerization activity;protein homodimerization activity;protein kinase ac…	cell junction;cell part;cytoplasmic part;cytoplasmic vesicle membrane;cytoplasmic vesicle part;cytosol;endocytic vesicle membrane;intracellular membrane-bounded organelle;intracellular organelle;intracellular organelle part;intracellular part;membrane;membrane-bounded organelle;mitochondrion;nuclear part;nucleoplasm;nucleus;organelle;organelle membrane;organelle part;plasma membrane;presynaptic m…	CaMKII_AD;Pkinase	19	1	36.8	7.1	54.087	0	31.215	13201000	NaN	NaN	NaN	NaN	NaN	NaN	NaN	NaN	NaN	NaN	NaN	NaN	NaN	NaN	NaN	NaN	NaN	NaN	NaN	NaN	NaN	NaN	NaN	NaN	NaN	NaN	NaN	NaN	NaN	NaN	NaN	NaN	NaN	NaN
Q13554-4;Q13554-3;Q13554-5;Q13554-8;Q13554-2;Q13554-7;Q13554;Q13554-6;H7BXS4;H7C394;E9PBE8;E7ETC9;E7EQE4;E7ERS6;H7BZC6	Q13554-4;Q13554-3;Q13554-5;Q13554-8;Q13554-2;Q13554-7;Q13554;Q13554-6;H7BXS4	Calcium/calmodulin-dependent protein kinase type II subunit beta	CAMK2B	activation of meiosis involved in egg activation;biological regulation;calcium ion transport;cation transport;cell communication;cell cycle process;cell surface receptor linked signaling pathway;cell-cell signaling;cellular macromolecule metabolic process;cellular metabolic process;cellular process;cellular protein metabolic process;cellular response to chemical stimulus;cellular response to cyto…	adenyl nucleotide binding;adenyl ribonucleotide binding;ATP binding;binding;calmodulin-dependent protein kinase activity;catalytic activity;identical protein binding;kinase activity;nucleotide binding;phosphotransferase activity, alcohol group as acceptor;protein binding;protein dimerization activity;protein homodimerization activity;protein kinase activity;protein serine/threonine kinase activit…	cell part;cytoplasmic part;cytoplasmic vesicle membrane;cytoplasmic vesicle part;cytoskeletal part;cytosol;endocytic vesicle membrane;endoplasmic reticulum membrane;endoplasmic reticulum part;intracellular organelle part;intracellular part;membrane;membrane part;microtubule organizing center;nuclear part;nucleoplasm;organelle membrane;organelle part;plasma membrane;sarcoplasmic reticulum membrane…	CaMKII_AD;Pkinase	34	6	71	15.9	54.073	0	99.27	4648300000	-1.63019	0.0183868	-0.390108	0.11096	1.53734	1.77028	0.892237	0.562315	1.23252	1.44132	1.13624	1.41162	0.419128	1.07173	0.971239	0.913795	0.618122	0.862732	0.492769	0.390474	0.162664	-0.0506954	0.654102	-0.0875244	0.592575	0.589386	-0.175728	0.531527	1.63646	1.05398	-0.0273457	-0.033287	0.734564	1.54209
Q13557;D6R938;Q13557-8;H0Y9J2	Q13557;D6R938;Q13557-8	Calcium/calmodulin-dependent protein kinase type II subunit delta	CAMK2D	biological regulation;calcium ion homeostasis;calcium ion transport;calcium-mediated signaling;cation homeostasis;cation transport;cell communication;cell cycle process;cell growth;cell growth involved in cardiac muscle cell development;cell surface receptor linked signaling pathway;cell-cell signaling;cellular calcium ion homeostasis;cellular cation homeostasis;cellular chemical homeostasis;cell…	adenyl nucleotide binding;adenyl ribonucleotide binding;ATP binding;binding;calmodulin binding;calmodulin-dependent protein kinase activity;catalytic activity;channel inhibitor activity;channel regulator activity;cytoskeletal protein binding;identical protein binding;ion channel binding;ion channel inhibitor activity;kinase activity;nucleotide binding;phosphotransferase activity, alcohol group as…	axon part;calcium channel complex;cation channel complex;cell body;cell junction;cell part;cell projection part;cell-cell contact zone;cell-cell junction;cytoplasm;cytoplasmic part;cytoplasmic vesicle membrane;cytoplasmic vesicle part;cytosol;endocytic vesicle membrane;endoplasmic reticulum membrane;endoplasmic reticulum part;initial segment;intercalated disc;intracellular membrane-bounded organe…	CaMKII_AD;Pkinase	64	0	89	0	56.369	0	323.31	2297700000000	9.84477	9.97658	9.38785	10.0244	10.4857	10.7941	10.0476	9.83298	10.4139	10.6971	10.3944	10.3259	9.8651	10.1002	10.1926	9.99155	9.93273	9.86694	10.2761	10.2607	9.5516	9.09854	10.0517	10.0876	10.1228	10.266	9.87866	9.60806	10.1678	10.03	9.85736	10.0485	10.3887	10.4535
Q13555-6;Q13555-8;A0A0A0MT11;Q13555-2;Q13555;H0Y6G2	Q13555-6;Q13555-8;A0A0A0MT11;Q13555-2;Q13555;H0Y6G2	Calcium/calmodulin-dependent protein kinase type II subunit gamma	CAMK2G	anatomical structure development;biological regulation;calcium ion transport;cation transport;cell communication;cell cycle process;cell differentiation;cell surface receptor linked signaling pathway;cell-cell signaling;cellular component assembly;cellular component organization;cellular component organization or biogenesis;cellular developmental process;cellular macromolecule metabolic process;c…	adenyl nucleotide binding;adenyl ribonucleotide binding;ATP binding;binding;calcium-dependent protein serine/threonine phosphatase activity;calmodulin binding;calmodulin-dependent protein kinase activity;catalytic activity;hydrolase activity;hydrolase activity, acting on ester bonds;identical protein binding;kinase activity;nucleotide binding;phosphatase activity;phosphoprotein phosphatase activi…	cell part;cytoplasmic part;cytoplasmic vesicle membrane;cytoplasmic vesicle part;cytosol;endocytic vesicle membrane;endoplasmic reticulum membrane;endoplasmic reticulum part;intracellular organelle part;intracellular part;membrane;membrane part;nuclear part;nucleoplasm;organelle membrane;organelle part;plasma membrane;sarcoplasmic reticulum membrane;vesicle membrane	CaMKII_AD;Pkinase	57	0	90.8	0	65.241	0	323.31	494780000000	7.36387	7.59748	6.8868	7.5009	8.37363	8.65277	7.88906	7.65718	8.29921	8.4981	8.27538	8.43109	7.36107	7.70885	7.65936	7.55865	7.49442	7.3027	7.8181	7.74755	7.0681	6.64834	7.51952	7.62611	7.60113	7.80296	7.27383	7.38661	7.88329	7.65659	7.53809	7.60026	8.36663	8.59892
Q96RR4-3;Q96RR4-2;Q96RR4-7;Q96RR4;Q96RR4-5;Q96RR4-6;Q96RR4-4;F5GZ00;F5H4I7	Q96RR4-3;Q96RR4-2;Q96RR4-7;Q96RR4;Q96RR4-5;Q96RR4-6;Q96RR4-4;F5GZ00	Calcium/calmodulin-dependent protein kinase kinase 2	CAMKK2	biological regulation;calcium-mediated signaling;cellular macromolecule metabolic process;cellular metabolic process;cellular process;cellular protein metabolic process;cellular response to stimulus;intracellular protein kinase cascade;intracellular signal transduction;macromolecule metabolic process;macromolecule modification;MAPKKK cascade;metabolic process;peptidyl-amino acid modification;pept…	adenyl nucleotide binding;adenyl ribonucleotide binding;ATP binding;binding;calcium ion binding;calmodulin binding;calmodulin-dependent protein kinase activity;catalytic activity;cation binding;ion binding;kinase activity;metal ion binding;nucleotide binding;phosphotransferase activity, alcohol group as acceptor;protein binding;protein kinase activity;protein serine/threonine kinase activity;prot…	cell part;cell projection;cytoplasm;intracellular;intracellular membrane-bounded organelle;intracellular organelle;intracellular part;membrane-bounded organelle;nucleus;organelle	Pkinase	27	27	59	59	59.601	0	323.31	28950000000	-2.06747	NaN	NaN	-2.14926	-0.801632	-0.486984	5.68338	5.36399	-2.06865	-1.28795	-1.01295	-0.806959	5.03731	5.3504	5.59353	5.52131	5.38066	5.3163	5.24829	5.37546	4.71876	4.41608	5.19558	5.43379	5.39603	5.49687	5.06815	5.16135	5.59086	5.47083	5.48959	5.47138	-1.79279	-0.709894
Q9Y5S2;H0YLY0;H0Y6V3;Q6DT37	Q9Y5S2;H0YLY0	Serine/threonine-protein kinase MRCK beta	CDC42BPB	actin cytoskeleton organization;actin cytoskeleton reorganization;actin filament-based process;actomyosin structure organization;biological regulation;cell migration;cell motility;cellular component movement;cellular component organization;cellular component organization at cellular level;cellular component organization or biogenesis;cellular component organization or biogenesis at cellular level…	adenyl nucleotide binding;adenyl ribonucleotide binding;ATP binding;binding;catalytic activity;cation binding;ion binding;kinase activity;magnesium ion binding;metal ion binding;nucleotide binding;phosphotransferase activity, alcohol group as acceptor;protein kinase activity;protein serine/threonine kinase activity;purine nucleotide binding;purine ribonucleoside triphosphate binding;purine ribonu…	actomyosin;cell junction;cell leading edge;cell part;cell-cell junction;cytoplasm;cytoskeletal part;cytoskeleton;extracellular membrane-bounded organelle;extracellular organelle;extracellular region part;extracellular vesicular exosome;intracellular non-membrane-bounded organelle;intracellular organelle;intracellular organelle part;intracellular part;membrane;membrane-bounded organelle;membrane-b…	C1_1;CNH;DMPK_coil;PH;Pkinase;Pkinase_C	44	37	36.1	32.3	194.31	0	323.31	7521400000	-0.192074	0.742344	-0.581665	0.188122	2.89192	3.10552	-0.197655	-2.16602	3.42422	2.79175	2.68368	2.94294	-0.912815	-0.719383	-0.106009	-1.45956	-1.0452	-1.32751	0.317385	-0.432009	0.158808	-1.48951	-0.710192	-0.719284	-1.57819	-1.17881	-0.476561	-2.639	-0.241314	-1.43577	-2.00607	-1.60081	2.83571	3.19161
A0A024QZP7;P06493;P06493-2;A0A087WZZ9;E5RIU6	A0A024QZP7;P06493;P06493-2;A0A087WZZ9;E5RIU6	Cyclin-dependent kinase 1	CDK1	activation of immune response;activation of innate immune response;activation of MAPK activity;activation of MAPKK activity;activation of protein kinase activity;aging;anaphase-promoting complex-dependent proteasomal ubiquitin-dependent protein catabolic process;anatomical structure development;anatomical structure morphogenesis;apoptosis;axon guidance;biological regulation;biosynthetic process;c…	adenyl nucleotide binding;adenyl ribonucleotide binding;ATP binding;binding;catalytic activity;cyclin-dependent protein kinase activity;histone kinase activity;kinase activity;nucleotide binding;phosphotransferase activity, alcohol group as acceptor;protein kinase activity;protein serine/threonine kinase activity;purine nucleotide binding;purine ribonucleoside triphosphate binding;purine ribonucl…	cell part;centrosome;cytoplasm;cytoplasmic part;cytoskeletal part;cytosol;extracellular membrane-bounded organelle;extracellular organelle;extracellular region part;extracellular vesicular exosome;intracellular membrane-bounded organelle;intracellular non-membrane-bounded organelle;intracellular organelle;intracellular organelle part;intracellular part;macromolecular complex;membrane;membrane-bou…	Pkinase	33	30	89.9	82.2	34.081	0	323.31	60983000000	0.854492	1.27458	2.15871	2.14621	5.82898	6.05245	4.80274	4.70509	6.07651	5.92623	5.86842	5.80442	4.12176	4.45961	5.10245	4.90863	4.52625	4.66532	4.39269	4.01188	4.33901	3.80068	4.13768	4.22729	4.76043	4.96177	4.22043	4.47539	4.78705	5.03013	4.39883	4.6791	3.75186	3.67172
Q15131;F8W872;Q15131-5;Q15131-3;Q15131-2;H3BT74;Q15131-6;Q15131-4;Q15131-7;Q9UHL7;D6RA59;D6RHH3;D6REZ2	Q15131;F8W872;Q15131-5;Q15131-3;Q15131-2	Cyclin-dependent kinase 10	CDK10	biological regulation;negative regulation of biological process;negative regulation of cell proliferation;negative regulation of cellular process;positive regulation of biological process;positive regulation of cell communication;positive regulation of cellular process;positive regulation of intracellular protein kinase cascade;positive regulation of MAPKKK cascade;positive regulation of response…	adenyl nucleotide binding;adenyl ribonucleotide binding;ATP binding;binding;catalytic activity;cyclin-dependent protein kinase activity;kinase activity;nucleotide binding;phosphotransferase activity, alcohol group as acceptor;protein kinase activity;protein serine/threonine kinase activity;purine nucleotide binding;purine ribonucleoside triphosphate binding;purine ribonucleotide binding;ribonucle…		Pkinase	8	8	20	20	41.038	0	22.637	1172200000	-2.88678	NaN	-3.01064	-2.16985	-1.08911	-0.207636	-0.154293	-0.28442	-0.0643825	0.244638	-0.829065	-1.0177	-0.777517	-0.728521	-0.59277	0	-0.857788	-1.1959	-2.05515	-0.847574	-1.06094	-1.05316	-1.14378	-0.0471764	-0.118137	0.308432	-0.757959	-0.107132	-0.0628204	0.392466	0.0212994	0.0195713	-4.15806	-3.8653
A0A0D9SEI3;J3QKR5;B7ZVY7;A0A0D9SER5;A0A0D9SEN2;J3QR44;P21127-8;P21127-3;P21127-2;P21127;J3QR29;P21127-12;P21127-4;P21127-5;P21127-10;P21127-6;P21127-9;Q5QPR3;Q9UQ88-4;Q9UQ88-3;Q9UQ88-2;Q9UQ88;Q5QPR4;Q9UQ88-10;Q9UQ88-5;Q9UQ88-9;Q9UQ88-8;Q5QPQ9;E9PFJ2;A0A087WYI9;A0A087X1I0;J3KS35;E7ESP2	A0A0D9SEI3;J3QKR5;B7ZVY7;A0A0D9SER5;A0A0D9SEN2;J3QR44;P21127-8;P21127-3;P21127-2;P21127;J3QR29;P21127-12;P21127-4;P21127-5;P21127-10;P21127-6;P21127-9;Q5QPR3;Q9UQ88-4;Q9UQ88-3;Q9UQ88-2;Q9UQ88;Q5QPR4;Q9UQ88-10;Q9UQ88-5;Q9UQ88-9	Cyclin-dependent kinase 11B;Cyclin-dependent kinase 11A	CDK11A/B	apoptosis;biological regulation;cell cycle phase;cell cycle process;cell death;cell division;cell proliferation;cellular component organization;cellular component organization at cellular level;cellular component organization or biogenesis;cellular component organization or biogenesis at cellular level;cellular macromolecule metabolic process;cellular metabolic process;cellular process;cellular p…	adenyl nucleotide binding;adenyl ribonucleotide binding;ATP binding;binding;catalytic activity;cyclin-dependent protein kinase activity;kinase activity;nucleotide binding;phosphotransferase activity, alcohol group as acceptor;protein kinase activity;protein serine/threonine kinase activity;purine nucleotide binding;purine ribonucleoside triphosphate binding;purine ribonucleotide binding;ribonucle…	cell part;cytoplasm;intracellular membrane-bounded organelle;intracellular organelle;intracellular organelle part;intracellular part;membrane-bounded organelle;nuclear part;nucleoplasm;nucleus;organelle;organelle part	Pkinase	13	12	23.6	22.5	89.437	0	73.451	1657100000	-1.62193	-3.59642	3.27439	NaN	0.0610924	0.459686	-2.68707	-2.66082	-0.179415	-0.394552	1.15547	-0.630621	-4.3557	-2.51548	-4.05736	-1.57453	-4.12504	-0.854302	-2.39992	NaN	-1.39804	-2.29087	-2.93467	-1.63261	-1.63617	-1.87806	-1.31999	-0.192244	-1.94488	-2.0767	-3.92259	-4.11891	-0.841135	-0.101496
Q9NYV4-2;Q9NYV4;J3QSD7;Q9NYV4-3;A0A087X209;Q14004-2;Q14004;Q9BVE2;H0YLT2	Q9NYV4-2;Q9NYV4;J3QSD7;Q9NYV4-3	Cyclin-dependent kinase 12	CDK12	alternative nuclear mRNA splicing, via spliceosome;anatomical structure development;biological regulation;cellular macromolecule metabolic process;cellular metabolic process;cellular nitrogen compound metabolic process;cellular process;cellular protein metabolic process;developmental process;hemopoiesis;hemopoietic or lymphoid organ development;macromolecule metabolic process;macromolecule modifi…	adenyl nucleotide binding;adenyl ribonucleotide binding;ATP binding;binding;catalytic activity;cyclin binding;cyclin-dependent protein kinase activity;kinase activity;nucleotide binding;phosphotransferase activity, alcohol group as acceptor;protein binding;protein kinase activity;protein serine/threonine kinase activity;purine nucleotide binding;purine ribonucleoside triphosphate binding;purine r…	cell part;cyclin-dependent protein kinase holoenzyme complex;cytoplasm;cytoplasmic part;extracellular region part;extracellular space;Golgi apparatus;intracellular membrane-bounded organelle;intracellular non-membrane-bounded organelle;intracellular organelle;intracellular organelle part;intracellular part;macromolecular complex;membrane-bounded organelle;non-membrane-bounded organelle;nuclear bo…	Pkinase	19	18	21.1	20.6	163.23	0	78.119	2363200000	-3.16236	-1.41116	-3.55366	-1.79204	0.128315	0.977779	0.391947	0.0214882	0.0520515	0.902617	0.546648	1.1012	-0.493841	0.435711	-0.211624	0.107817	-1.53572	0.479176	-0.943771	-1.03043	-0.0594921	-0.747856	-0.193163	-0.31521	0.444557	0.151092	-0.0833759	0.453615	-0.686527	0.355108	-1.25191	-0.639692	0.122015	1.01173
Q00536-3;A0A087WZU2;Q00536;E5RGN0;H0YAZ9;H0YBX5;E5RJM2;E5RIY8;E5RIU4;E7EUK8;O94921-3;O94921-2;O94921;Q07002;Q07002-2;Q07002-3;E5RGV7;H0YC36;H0YC60;D6RA44;A0A0A0MSJ6	Q00536-3;A0A087WZU2;Q00536;E5RGN0	Cyclin-dependent kinase 16	CDK16	biological regulation;cell cycle process;cell division;cell projection organization;cell surface receptor linked signaling pathway;cellular component organization;cellular component organization at cellular level;cellular component organization or biogenesis;cellular component organization or biogenesis at cellular level;cellular macromolecule metabolic process;cellular metabolic process;cellular…	adenyl nucleotide binding;adenyl ribonucleotide binding;ATP binding;binding;catalytic activity;cyclin binding;cyclin-dependent protein kinase activity;kinase activity;nucleotide binding;phosphotransferase activity, alcohol group as acceptor;protein binding;protein kinase activity;protein serine/threonine kinase activity;purine nucleotide binding;purine ribonucleoside triphosphate binding;purine r…	cell junction;cell part;cell projection;clathrin-coated vesicle;coated vesicle;cyclin-dependent protein kinase holoenzyme complex;cytoplasm;cytoplasmic cyclin-dependent protein kinase holoenzyme complex;cytoplasmic membrane-bounded vesicle;cytoplasmic part;cytoplasmic vesicle;cytoskeleton;cytosol;extrinsic to internal side of plasma membrane;extrinsic to membrane;extrinsic to plasma membrane;intr…	Pkinase	11	1	27.3	2	56.375	0	23.021	821000000	NaN	NaN	NaN	NaN	NaN	NaN	-1.81966	-0.97497	-1.83808	-4.52963	NaN	-4.47544	-3.05062	-1.2387	-1.7391	-0.953724	-1.52682	-1.84865	-2.91857	-3.38489	-0.837193	-0.729487	-1.27748	-2.54787	-0.255568	-1.74137	-1.34923	0.654732	1.46232	-0.181335	-1.79363	-0.946241	-1.74847	NaN
P24941;G3V5T9;P24941-2;G3V317	P24941;G3V5T9;P24941-2	Cyclin-dependent kinase 2	CDK2	anaphase-promoting complex-dependent proteasomal ubiquitin-dependent protein catabolic process;biological regulation;biosynthetic process;blood coagulation;catabolic process;cation transport;cell cycle;cell cycle checkpoint;cell cycle phase;cell cycle process;cell division;cellular biosynthetic process;cellular catabolic process;cellular component organization;cellular component organization at c…	adenyl nucleotide binding;adenyl ribonucleotide binding;ATP binding;binding;catalytic activity;cation binding;cyclin binding;cyclin-dependent protein kinase activity;ion binding;kinase activity;metal ion binding;nucleotide binding;phosphotransferase activity, alcohol group as acceptor;protein binding;protein kinase activity;protein serine/threonine kinase activity;purine nucleotide binding;purine…	Cajal body;cell part;centrosome;chromosomal part;chromosome;chromosome, telomeric region;condensed chromosome;cyclin-dependent protein kinase holoenzyme complex;cytoplasm;cytoplasmic part;cytoskeletal part;cytosol;endosome;intracellular membrane-bounded organelle;intracellular non-membrane-bounded organelle;intracellular organelle;intracellular organelle part;intracellular part;macromolecular com…	Pkinase	52	15	100	35.6	33.929	0	323.31	352700000000	3.36088	4.15727	2.9941	4.07035	6.01146	6.15651	7.61395	7.77438	7.35713	7.39252	7.46403	7.4016	7.1768	7.39403	8.38482	8.33094	7.75689	7.63241	6.68605	6.77574	7.06344	6.75645	7.81519	7.81771	7.90395	8.06848	8.00344	8.20303	8.2063	8.39464	7.73663	7.93206	4.27141	4.12287
Q00526;K7ELV5;K7EJ83	Q00526;K7ELV5;K7EJ83	Cyclin-dependent kinase 3	CDK3	biological regulation;cell cycle phase;cell cycle process;cell division;cell proliferation;cellular component organization;cellular component organization at cellular level;cellular component organization or biogenesis;cellular component organization or biogenesis at cellular level;cellular process;G0 to G1 transition;G1/S transition of mitotic cell cycle;mitosis;nuclear division;organelle fissio…	adenyl nucleotide binding;adenyl ribonucleotide binding;ATP binding;binding;catalytic activity;cyclin-dependent protein kinase activity;kinase activity;nucleotide binding;phosphotransferase activity, alcohol group as acceptor;protein kinase activity;protein serine/threonine kinase activity;purine nucleotide binding;purine ribonucleoside triphosphate binding;purine ribonucleotide binding;ribonucle…		Pkinase	7	2	24.3	8.5	35.045	0.0061247	2.7499	6257100000	-0.132322	0.710531	-0.258541	0.700643	1.01653	2.27256	1.25373	1.59836	0.70042	1.97686	1.51952	2.07566	1.49612	2.34573	1.8291	1.79821	1.59221	1.38147	1.17058	2.11409	1.09412	-0.0438137	1.21492	1.88739	1.67153	2.42317	1.61086	1.35841	1.48139	2.08408	1.61776	1.65883	1.22386	2.73651
F8VZ51;P11802-2;P11802	F8VZ51;P11802-2;P11802	Cyclin-dependent kinase 4	CDK4	anatomical structure development;anatomical structure morphogenesis;biological regulation;cell cycle;cell cycle process;cell division;cellular component organization;cellular component organization at cellular level;cellular component organization or biogenesis;cellular component organization or biogenesis at cellular level;cellular macromolecule metabolic process;cellular metabolic process;cellu…	adenyl nucleotide binding;adenyl ribonucleotide binding;ATP binding;binding;catalytic activity;cyclin binding;cyclin-dependent protein kinase activity;cyclin-dependent protein kinase regulator activity;enzyme regulator activity;kinase activity;kinase regulator activity;nucleotide binding;phosphotransferase activity, alcohol group as acceptor;protein binding;protein kinase activity;protein kinase …	cell junction;cell part;cell-cell junction;chromatin;chromosomal part;cyclin-dependent protein kinase holoenzyme complex;cytoplasmic part;cytosol;intracellular membrane-bounded organelle;intracellular non-membrane-bounded organelle;intracellular organelle;intracellular organelle part;intracellular part;macromolecular complex;membrane;membrane-bounded organelle;non-membrane-bounded organelle;nucle…	Pkinase	2	1	21.2	17.3	23.455	0.0040816	3.3427	4293300	NaN	NaN	NaN	NaN	NaN	NaN	NaN	NaN	NaN	NaN	NaN	NaN	NaN	-4.54038	NaN	-4.12336	NaN	NaN	NaN	NaN	NaN	NaN	NaN	NaN	NaN	NaN	NaN	NaN	NaN	NaN	NaN	NaN	NaN	NaN
Q00535;Q00535-2;F8VXD2;F8VYH9;F8VZZ0;F8VTV8;F8VWX7;Q00534;Q96Q40-2;Q96Q40-4;Q96Q40-3;Q96Q40-5;Q96Q40	Q00535;Q00535-2	Cyclin-dependent-like kinase 5	CDK5	actin cytoskeleton organization;actin filament-based process;adult behavior;anatomical structure development;anatomical structure formation involved in morphogenesis;anatomical structure morphogenesis;apoptosis;associative learning;astrocyte development;axon extension;axon guidance;behavior;behavioral response to cocaine;biological adhesion;biological regulation;blood coagulation;calcium ion impo…	acetylcholine receptor activator activity;acetylcholine receptor regulator activity;adenyl nucleotide binding;adenyl ribonucleotide binding;ATP binding;binding;catalytic activity;cation binding;cyclin binding;cyclin-dependent protein kinase activity;ErbB-2 class receptor binding;ErbB-3 class receptor binding;ion binding;kinase activity;metal ion binding;nucleotide binding;phosphotransferase activ…	axon;cell body;cell junction;cell part;cell projection;cell projection part;centrosome;cyclin-dependent protein kinase 5 holoenzyme complex;cyclin-dependent protein kinase holoenzyme complex;cytoplasm;cytoplasmic part;cytoskeletal part;cytoskeleton;cytosol;dendrite;filopodium;growth cone;intracellular membrane-bounded organelle;intracellular non-membrane-bounded organelle;intracellular organelle;…	Pkinase	42	41	98.3	98.3	33.304	0	323.31	509170000000	4.97372	5.31265	4.99081	5.75178	6.53606	6.59611	8.85137	8.6377	7.64116	7.77298	7.62906	7.73771	8.39862	8.60714	9.00639	9.10466	8.92319	8.6716	8.59648	8.34982	8.03624	7.60018	8.83865	8.67627	8.8593	8.85634	8.76594	8.63632	9.05091	9.02118	8.75083	8.84923	5.4986	5.94591
P50613;D6R9G1;D6RAD4;D6REC6;D6RFL0;D6RGG9;D6RI01;D6R9Z2;D6RF14;D6RIG9;A0A0D9SFW9;Q9C098	P50613;D6R9G1;D6RAD4	Cyclin-dependent kinase 7	CDK7	androgen receptor signaling pathway;biological regulation;biosynthetic process;catabolic process;cell cycle;cell cycle arrest;cell cycle process;cell division;cell proliferation;cellular biosynthetic process;cellular catabolic process;cellular macromolecule biosynthetic process;cellular macromolecule catabolic process;cellular macromolecule metabolic process;cellular metabolic process;cellular ni…	adenyl nucleotide binding;adenyl ribonucleotide binding;androgen receptor binding;ATP binding;ATPase activity;ATPase activity, coupled;binding;catalytic activity;cyclin-dependent protein kinase activity;DNA-dependent ATPase activity;hormone receptor binding;hydrolase activity;hydrolase activity, acting on acid anhydrides;hydrolase activity, acting on acid anhydrides, in phosphorus-containing anhy…	cell part;cytoplasm;cytoplasmic part;holo TFIIH complex;intracellular membrane-bounded organelle;intracellular organelle;intracellular organelle part;intracellular part;macromolecular complex;membrane-bounded organelle;mitochondrion;nuclear part;nucleoplasm;nucleoplasm part;nucleus;organelle;organelle part;perinuclear region of cytoplasm;protein complex;transcription factor complex	Pkinase	7	7	31.8	31.8	39.038	0	84.747	5452600000	NaN	NaN	-2.8004	-2.87834	2.01746	2.08801	0.682133	0.528393	1.061	1.24712	0.717943	0.706146	-0.366861	0.522535	1.2543	0.538826	0.299007	1.08563	-0.95504	-0.215801	1.18977	1.12099	-0.277725	0.727362	1.19223	1.78147	-0.262442	1.33069	1.51075	2.01541	0.833592	1.07974	-1.0018	-0.384195
P50750;P50750-2;X6RE90	P50750;P50750-2	Cyclin-dependent kinase 9	CDK9	biological regulation;biosynthetic process;cell proliferation;cell surface receptor linked signaling pathway;cellular biosynthetic process;cellular macromolecule biosynthetic process;cellular macromolecule metabolic process;cellular metabolic process;cellular nitrogen compound metabolic process;cellular process;cellular protein metabolic process;cellular response to chemical stimulus;cellular res…	adenyl nucleotide binding;adenyl ribonucleotide binding;ATP binding;binding;catalytic activity;chromatin binding;cyclin-dependent protein kinase activity;DNA binding;kinase activity;nucleic acid binding;nucleotide binding;phosphotransferase activity, alcohol group as acceptor;protein kinase activity;protein serine/threonine kinase activity;purine nucleotide binding;purine ribonucleoside triphosph…	carboxy-terminal domain protein kinase complex;cell part;cytoplasm;intracellular membrane-bounded organelle;intracellular organelle;intracellular organelle part;intracellular part;macromolecular complex;membrane;membrane-bounded organelle;nuclear body;nuclear part;nucleoplasm;nucleoplasm part;organelle;organelle part;PML body;positive transcription elongation factor complex b;protein complex;tran…	Pkinase	17	16	59.4	57.3	42.777	0	178.15	10232000000	NaN	-0.313515	-4.05986	-3.14296	1.03455	1.76694	3.7523	3.66695	1.19857	1.56691	1.17431	1.59074	2.71516	3.57449	3.63549	3.80655	3.43074	3.2521	2.54927	3.03066	2.97095	2.9241	2.67262	3.05894	3.35031	4.02835	3.45544	3.45839	3.93156	3.97047	2.81036	3.1869	1.04433	1.42467
E7EPP6;O14757-2;O14757;J3KN87;O14757-3;E9PPA5;A0A087WY91;E9PKQ3	E7EPP6;O14757-2;O14757;J3KN87;O14757-3	Serine/threonine-protein kinase Chk1	CHEK1	aging;biological regulation;biosynthetic process;cell aging;cell cycle checkpoint;cell cycle process;cellular biosynthetic process;cellular component organization;cellular component organization at cellular level;cellular component organization or biogenesis;cellular component organization or biogenesis at cellular level;cellular macromolecule biosynthetic process;cellular macromolecule metabolic…	adenyl nucleotide binding;adenyl ribonucleotide binding;ATP binding;binding;catalytic activity;histone kinase activity;histone kinase activity (H3-T11 specific);histone threonine kinase activity;kinase activity;nucleotide binding;phosphotransferase activity, alcohol group as acceptor;protein kinase activity;protein serine/threonine kinase activity;purine nucleotide binding;purine ribonucleoside t…	cell part;centrosome;chromatin;chromosomal part;chromosome;condensed chromosome;condensed nuclear chromosome;cytoplasmic part;cytoskeletal part;cytosol;extracellular region part;extracellular space;intracellular membrane-bounded organelle;intracellular non-membrane-bounded organelle;intracellular organelle;intracellular organelle part;intracellular part;membrane-bounded organelle;microtubule orga…	Pkinase	10	10	28.3	28.3	55.517	0	85.393	2586000000	-2.58343	-1.74495	-2.59778	-5.44156	1.59112	1.37607	-0.411852	0.170311	1.08473	1.68503	0.804125	1.44879	-0.979445	-0.421217	-0.0697632	-0.395214	-1.01971	-0.305372	-1.77389	-0.537399	-1.64085	-1.44304	-1.519	-2.02411	-1.26213	-1.51851	-1.02951	-0.973494	-0.854504	0.0885563	-2.79414	-1.04589	1.22081	1.35048
O96017;O96017-9;O96017-13;O96017-4;H0Y820;B7ZBF6	O96017;O96017-9;O96017-13;O96017-4;H0Y820	Serine/threonine-protein kinase Chk2	CHEK2	aging;biological regulation;biosynthetic process;catabolic process;cell aging;cell cycle checkpoint;cell cycle process;cell division;cellular biosynthetic process;cellular catabolic process;cellular component assembly;cellular component assembly at cellular level;cellular component organization;cellular component organization at cellular level;cellular component organization or biogenesis;cellula…	adenyl nucleotide binding;adenyl ribonucleotide binding;ATP binding;binding;catalytic activity;cation binding;enzyme binding;identical protein binding;ion binding;kinase activity;kinase binding;metal ion binding;nucleotide binding;phosphotransferase activity, alcohol group as acceptor;protein binding;protein dimerization activity;protein homodimerization activity;protein kinase activity;protein k…	cell part;cytoplasmic part;Golgi apparatus;intracellular membrane-bounded organelle;intracellular organelle;intracellular organelle part;intracellular part;membrane-bounded organelle;nuclear body;nuclear part;nucleoplasm;nucleoplasm part;organelle;organelle part;PML body	FHA;Pkinase	14	1	36.3	3.5	60.914	0	234.87	4474100000	0.823738	1.22929	-0.746418	0.713963	1.24419	1.21094	1.19545	0.994465	1.08073	1.48364	0.743729	0.940167	0.953901	1.55173	1.25711	1.17637	1.2454	0.541142	0.961992	0.784256	0.83938	0.328222	0.740494	0.251263	1.31343	-0.0685368	0.476303	0.803154	1.69146	1.27445	0.711559	0.797947	1.31255	1.69063
P49759;P49759-3;A0A087WVK0;B8ZZR0;F8WBF5;P49759-2	P49759;P49759-3;A0A087WVK0;B8ZZR0	Dual specificity protein kinase CLK1	CLK1	biological regulation;cell proliferation;cellular macromolecule metabolic process;cellular metabolic process;cellular process;cellular protein metabolic process;macromolecule metabolic process;macromolecule modification;metabolic process;peptidyl-amino acid modification;peptidyl-serine modification;peptidyl-serine phosphorylation;peptidyl-threonine modification;peptidyl-threonine phosphorylation;…	adenyl nucleotide binding;adenyl ribonucleotide binding;ATP binding;binding;catalytic activity;kinase activity;non-membrane spanning protein tyrosine kinase activity;nucleotide binding;phosphotransferase activity, alcohol group as acceptor;protein kinase activity;protein serine/threonine kinase activity;protein serine/threonine/tyrosine kinase activity;protein tyrosine kinase activity;purine nucl…	cell part;cytoplasm;intracellular membrane-bounded organelle;intracellular organelle;intracellular part;membrane-bounded organelle;nucleus;organelle	Pkinase	21	19	38.6	37	57.29	0	160.78	16194000000	0.729221	1.21545	-0.0779343	0.737928	3.55163	3.97531	2.03643	2.31504	3.56768	3.78334	3.37624	3.45228	0.594492	1.98898	2.28795	2.83255	1.8874	2.55573	2.73075	2.55462	2.36809	1.92941	2.69949	2.73152	3.09198	3.04045	2.08921	2.29404	3.22648	2.96174	2.34845	2.72014	2.37336	3.11588
B1AVT0;P49760-3;P49760;P49760-2	B1AVT0;P49760-3;P49760	Dual specificity protein kinase CLK2	CLK2	biological regulation;cellular macromolecule metabolic process;cellular metabolic process;cellular process;cellular protein metabolic process;macromolecule metabolic process;macromolecule modification;metabolic process;negative regulation of biological process;negative regulation of biosynthetic process;negative regulation of carbohydrate metabolic process;negative regulation of cellular biosynth…	adenyl nucleotide binding;adenyl ribonucleotide binding;ATP binding;binding;catalytic activity;kinase activity;nucleotide binding;phosphotransferase activity, alcohol group as acceptor;protein kinase activity;protein serine/threonine kinase activity;protein serine/threonine/tyrosine kinase activity;protein tyrosine kinase activity;purine nucleotide binding;purine ribonucleoside triphosphate bindi…	cell part;intracellular membrane-bounded organelle;intracellular organelle;intracellular organelle part;intracellular part;membrane-bounded organelle;nuclear body;nuclear part;nuclear speck;nucleoplasm;nucleoplasm part;nucleus;organelle;organelle part	Pkinase	19	18	40.6	39	59.874	0	239.41	26172000000	1.38068	2.28416	1.1139	1.54649	4.15904	4.14503	2.99117	2.97974	3.83174	3.97298	3.78619	3.96576	2.03471	2.30975	4.31743	3.89137	2.92158	3.35051	3.3498	3.22952	2.36643	2.15653	3.17594	3.42687	4.40233	4.39635	3.60303	3.95048	4.49203	4.19022	3.40086	3.32916	2.68002	2.75769
P49761-1;P49761;P49761-3;H3BQG1;H3BRE4;H3BUL5;H3BVF8;H3BNC8;H3BNQ5;H3BRW2	P49761-1;P49761;P49761-3	Dual specificity protein kinase CLK3	CLK3	biological regulation;cellular macromolecule metabolic process;cellular metabolic process;cellular process;cellular protein metabolic process;macromolecule metabolic process;macromolecule modification;metabolic process;phosphate-containing compound metabolic process;phosphorus metabolic process;phosphorylation;primary metabolic process;protein autophosphorylation;protein metabolic process;protein…	adenyl nucleotide binding;adenyl ribonucleotide binding;ATP binding;binding;catalytic activity;kinase activity;nucleotide binding;phosphotransferase activity, alcohol group as acceptor;protein kinase activity;protein serine/threonine kinase activity;protein serine/threonine/tyrosine kinase activity;protein tyrosine kinase activity;purine nucleotide binding;purine ribonucleoside triphosphate bindi…	acrosomal vesicle;cell part;cytoplasmic membrane-bounded vesicle;cytoplasmic part;cytoplasmic vesicle;cytoskeleton;intermediate filament cytoskeleton;intracellular membrane-bounded organelle;intracellular non-membrane-bounded organelle;intracellular organelle;intracellular organelle part;intracellular part;membrane;membrane-bounded organelle;membrane-bounded vesicle;non-membrane-bounded organelle…	Pkinase	19	19	40.4	40.4	58.588	0	206	13875000000	1.34451	1.95896	1.14093	1.94623	2.83278	3.05577	3.13789	2.77024	2.85661	3.02185	2.90191	2.71719	2.19777	2.90284	3.02841	3.3576	2.80229	3.35017	2.39874	3.03011	2.00224	2.30841	2.30657	2.23057	2.87415	3.35467	2.25786	2.58244	3.44149	3.35476	2.50212	3.05023	1.76529	1.44965
Q9HAZ1;B7ZL31;A0A087WX74	Q9HAZ1;B7ZL31;A0A087WX74	Dual specificity protein kinase CLK4	CLK4	biological regulation;cellular macromolecule metabolic process;cellular metabolic process;cellular process;cellular protein metabolic process;macromolecule metabolic process;macromolecule modification;metabolic process;phosphate-containing compound metabolic process;phosphorus metabolic process;phosphorylation;primary metabolic process;protein autophosphorylation;protein metabolic process;protein…	adenyl nucleotide binding;adenyl ribonucleotide binding;ATP binding;binding;catalytic activity;kinase activity;nucleotide binding;phosphotransferase activity, alcohol group as acceptor;protein kinase activity;protein serine/threonine kinase activity;protein serine/threonine/tyrosine kinase activity;protein tyrosine kinase activity;purine nucleotide binding;purine ribonucleoside triphosphate bindi…	cell part;intracellular membrane-bounded organelle;intracellular organelle;intracellular part;membrane-bounded organelle;nucleus;organelle	Pkinase	3	1	7.9	3.3	57.491	0.0019355	5.6352	239060000	-3.85768	NaN	NaN	NaN	-2.30572	-2.26064	-3.06363	NaN	-2.02266	-2.53737	NaN	-1.86582	-3.84958	NaN	NaN	NaN	-3.0959	-3.42718	-2.90008	-2.90201	-3.13703	NaN	-2.50518	-2.87304	-1.96027	-2.21163	-2.4147	NaN	-2.18015	NaN	-3.41213	-3.03615	NaN	-2.39432
P41240;H3BUM9;H3BN15;K7ENL8;K7ES68;K7EQY5;A0A087WUR1;P42679-3;P42679;P42679-2	P41240	Tyrosine-protein kinase CSK	CSK	activation of immune response;adherens junction organization;anatomical structure development;anatomical structure morphogenesis;antigen receptor-mediated signaling pathway;biological regulation;blood coagulation;brain development;cell activation;cell differentiation;cell junction organization;cell migration;cell motility;cell proliferation;cell surface receptor linked signaling pathway;cell-cell…	adenyl nucleotide binding;adenyl ribonucleotide binding;ATP binding;binding;catalytic activity;identical protein binding;kinase activity;non-membrane spanning protein tyrosine kinase activity;nucleotide binding;phosphotransferase activity, alcohol group as acceptor;protein binding;protein C-terminus binding;protein kinase activity;protein tyrosine kinase activity;purine nucleotide binding;purine …	cell junction;cell part;cell-cell junction;cytoplasm;cytoplasmic part;cytosol;extracellular membrane-bounded organelle;extracellular organelle;extracellular region part;extracellular vesicular exosome;extrinsic to internal side of plasma membrane;extrinsic to membrane;extrinsic to plasma membrane;intracellular part;membrane;membrane part;membrane raft;membrane-bounded organelle;membrane-bounded v…	Pkinase_Tyr;SH2;SH3_1	82	71	98.4	90.4	50.704	0	323.31	2027800000000	9.12692	9.16851	8.66869	9.18282	10.0757	10.269	10.4596	10.1333	10.0803	10.3674	9.96316	10.0734	10.1715	10.3653	10.3583	10.4528	10.4961	10.1528	10.3173	10.3894	9.7595	9.66608	10.2939	10.3644	10.2309	10.4256	10.072	10.0027	10.5239	10.4448	10.1817	10.3391	9.87385	10.1013
P48729-3;P48729;P48729-2;E5RG27;D6RGE5;H0Y9X2;U3KQK7;Q8N752;U3KPX3;U3KQ83	P48729-3;P48729;P48729-2	Casein kinase I isoform alpha	CSNK1A1	anatomical structure morphogenesis;biological regulation;cell cycle phase;cell cycle process;cell division;cell morphogenesis;cell surface receptor linked signaling pathway;cellular component morphogenesis;cellular component organization;cellular component organization at cellular level;cellular component organization or biogenesis;cellular component organization or biogenesis at cellular level;c…	adenyl nucleotide binding;adenyl ribonucleotide binding;ATP binding;binding;catalytic activity;kinase activity;nucleotide binding;phosphotransferase activity, alcohol group as acceptor;protein kinase activity;protein serine/threonine kinase activity;purine nucleotide binding;purine ribonucleoside triphosphate binding;purine ribonucleotide binding;ribonucleotide binding;transferase activity;transf…	cell part;cell projection;centrosome;chromosomal part;cilium;condensed chromosome kinetochore;cytoplasm;cytoplasmic part;cytoskeletal part;cytosol;intracellular membrane-bounded organelle;intracellular non-membrane-bounded organelle;intracellular organelle;intracellular organelle part;intracellular part;kinetochore;macromolecular complex;membrane;membrane-bounded organelle;microtubule organizing …	Pkinase	18	8	56.6	28.6	37.567	0	202.42	15250000000	2.23176	2.34366	0.657537	1.37353	2.43643	2.5952	2.33987	3.09893	3.17266	2.10705	2.56782	2.78431	2.73381	2.96644	3.29228	3.3344	2.99164	3.0935	2.84967	2.82958	2.51216	2.08283	2.45139	2.34419	2.79987	3.11919	2.41609	2.74782	2.76154	3.48888	2.74217	3.07375	3.26919	3.10642
H7BYT1;P48730-2;P48730;J3QQI9;B4DLF1;H0Y2N6;J3KRM8	H7BYT1;P48730-2;P48730	Casein kinase I isoform delta	CSNK1D	biological regulation;cell cycle;cell cycle process;cell surface receptor linked signaling pathway;cellular component assembly;cellular component assembly at cellular level;cellular component organization;cellular component organization at cellular level;cellular component organization or biogenesis;cellular component organization or biogenesis at cellular level;cellular macromolecule metabolic p…	adenyl nucleotide binding;adenyl ribonucleotide binding;ATP binding;binding;catalytic activity;kinase activity;nucleotide binding;peptide binding;phosphotransferase activity, alcohol group as acceptor;protein kinase activity;protein serine/threonine kinase activity;purine nucleotide binding;purine ribonucleoside triphosphate binding;purine ribonucleotide binding;ribonucleotide binding;tau-protein…	cell part;centrosome;cytoplasmic part;cytoskeletal part;cytosol;Golgi apparatus;intracellular membrane-bounded organelle;intracellular non-membrane-bounded organelle;intracellular organelle;intracellular organelle part;intracellular part;macromolecular complex;membrane;membrane-bounded organelle;microtubule;microtubule organizing center;non-membrane-bounded organelle;nucleus;organelle;organelle p…	Pkinase	14	4	55.5	17.3	49.064	0	147.84	1764600000	-2.62688	-2.10125	-2.64585	-3.7662	-1.27291	-0.76652	1.26539	0.71118	-1.52612	-0.201963	-0.548069	-0.411262	0.040987	0.396723	0.925058	0.822788	0.83164	1.0269	0.578844	0.846964	0.929369	0.324047	0.516901	0.777376	0.598383	0.721914	-0.124826	-0.0539036	1.36997	1.00698	0.207953	1.48504	-0.767214	-0.417696
P49674;B0QY35;B0QY34;H0Y645;B0QY36;H0Y682;H0Y5S9	P49674;B0QY35;B0QY34;H0Y645;B0QY36	Casein kinase I isoform epsilon	CSNK1E	biological regulation;cell cycle;cell cycle process;cell surface receptor linked signaling pathway;cellular component organization;cellular component organization at cellular level;cellular component organization or biogenesis;cellular component organization or biogenesis at cellular level;cellular localization;cellular macromolecule localization;cellular macromolecule metabolic process;cellular …	adenyl nucleotide binding;adenyl ribonucleotide binding;ATP binding;binding;catalytic activity;kinase activity;nucleotide binding;phosphotransferase activity, alcohol group as acceptor;protein kinase activity;protein serine/threonine kinase activity;purine nucleotide binding;purine ribonucleoside triphosphate binding;purine ribonucleotide binding;ribonucleotide binding;transferase activity;transf…	cell part;cytoplasm;cytoplasmic part;cytosol;intracellular membrane-bounded organelle;intracellular organelle;intracellular part;macromolecular complex;membrane-bounded organelle;nucleus;organelle;ribonucleoprotein complex	Pkinase	13	3	49.3	10.1	47.315	0.0041104	3.4134	98726000	NaN	NaN	-1.99385	-2.36879	NaN	NaN	-2.92331	-3.09362	-3.01039	NaN	NaN	NaN	-3.7111	NaN	-2.9007	-3.14662	NaN	-2.89016	NaN	NaN	-3.1647	-3.06227	NaN	-2.92636	-3.16291	NaN	-3.50437	-4.13462	-2.67582	-2.61493	NaN	NaN	NaN	NaN
A0A087WW97;A0A087WZK4;H0YBN6;Q9Y6M4-6;Q9Y6M4-4;P78368	A0A087WW97;A0A087WZK4;H0YBN6;Q9Y6M4-6;Q9Y6M4-4;P78368	Casein kinase I isoform gamma-2	CSNK1G2/3	biological regulation;biosynthetic process;cell surface receptor linked signaling pathway;cellular biosynthetic process;cellular component organization;cellular component organization or biogenesis;cellular lipid metabolic process;cellular macromolecule metabolic process;cellular membrane organization;cellular metabolic process;cellular process;cellular protein metabolic process;cellular response…	adenyl nucleotide binding;adenyl ribonucleotide binding;ATP binding;binding;catalytic activity;cation binding;ion binding;kinase activity;magnesium ion binding;metal ion binding;nucleotide binding;peptide binding;phosphotransferase activity, alcohol group as acceptor;protein kinase activity;protein serine/threonine kinase activity;purine nucleotide binding;purine ribonucleoside triphosphate bindi…	cell part;cytoplasm;cytoplasmic part;cytosol;intracellular membrane-bounded organelle;intracellular organelle;intracellular part;membrane;membrane-bounded organelle;nucleus;organelle	CK1gamma_C;Pkinase	1	1	20.8	20.8	11.83	0	51.608	235930000	NaN	NaN	NaN	NaN	-2.31864	-2.45009	NaN	NaN	NaN	-2.49558	-2.49138	NaN	NaN	NaN	NaN	NaN	-3.04624	NaN	NaN	NaN	NaN	NaN	NaN	NaN	NaN	NaN	NaN	NaN	NaN	NaN	NaN	NaN	-2.7969	-1.96926
E7EU96;Q5U5J2;P68400;Q8NEV1;P68400-2;V9GY80;V9GYA2;V9GYW6;REV__E7EP72	E7EU96;Q5U5J2;P68400;Q8NEV1;P68400-2	Casein kinase II subunit alpha;Casein kinase II subunit alpha 3	CSNK2A1/3	axon guidance;biological regulation;biosynthetic process;cell cycle;cell cycle checkpoint;cell surface receptor linked signaling pathway;cellular biosynthetic process;cellular macromolecule biosynthetic process;cellular macromolecule metabolic process;cellular metabolic process;cellular nitrogen compound metabolic process;cellular process;cellular protein metabolic process;cellular response to st…	adenyl nucleotide binding;adenyl ribonucleotide binding;ATP binding;binding;catalytic activity;heat shock protein binding;Hsp90 protein binding;kinase activity;nucleotide binding;phosphotransferase activity, alcohol group as acceptor;protein binding;protein kinase activity;protein N-terminus binding;protein serine/threonine kinase activity;purine nucleotide binding;purine ribonucleoside triphosph…	cell part;chromatin remodeling complex;chromosomal part;cytoplasmic part;cytosol;histone deacetylase complex;intracellular membrane-bounded organelle;intracellular organelle;intracellular organelle part;intracellular part;macromolecular complex;membrane;membrane-bounded organelle;nuclear chromosome part;nuclear part;nucleoplasm part;nucleus;NuRD complex;organelle;organelle part;plasma membrane;pr…	Pkinase	64	41	84.2	67.3	45.31	0	323.31	1132400000000	8.54704	8.41657	6.71522	7.05518	9.7459	9.89598	7.6079	7.08034	8.61315	8.76922	9.09118	9.12045	7.19928	7.21794	8.45589	8.07473	6.98593	6.90369	6.23852	5.91242	7.13699	6.61814	8.02204	8.1816	8.54625	8.43479	8.86213	8.86947	7.55072	7.12859	6.53602	6.87589	8.50562	8.68169
P19784;H3BSA1;H3BV19;H3BNI9	P19784;H3BSA1	Casein kinase II subunit alpha	CSNK2A2	apoptosis;axon guidance;biological regulation;biosynthetic process;cell cycle;cell cycle checkpoint;cell death;cell surface receptor linked signaling pathway;cellular biosynthetic process;cellular macromolecule biosynthetic process;cellular macromolecule metabolic process;cellular metabolic process;cellular nitrogen compound metabolic process;cellular process;cellular response to stimulus;chemota…	adenyl nucleotide binding;adenyl ribonucleotide binding;ATP binding;binding;catalytic activity;kinase activity;nucleotide binding;phosphotransferase activity, alcohol group as acceptor;protein binding;protein kinase activity;protein N-terminus binding;protein serine/threonine kinase activity;purine nucleotide binding;purine ribonucleoside triphosphate binding;purine ribonucleotide binding;ribonuc…	cell part;cytoplasmic part;cytosol;intracellular membrane-bounded organelle;intracellular organelle;intracellular part;membrane-bounded organelle;nucleus;organelle	Pkinase	63	59	95.1	93.1	41.213	0	323.31	1192100000000	8.19634	8.46317	6.73346	7.27654	9.84178	10.0888	8.19411	7.94781	9.11815	9.25956	9.55958	9.39096	7.37682	7.76665	8.63914	8.59914	7.46065	7.22331	6.56219	6.74168	6.66402	6.34105	8.30257	8.33089	8.73592	9.15882	8.77477	9.20411	8.19455	8.14651	6.97408	7.29822	9.05586	9.14404
Q08345;Q08345-2;Q08345-6;Q08345-5;A0A0G2JNZ7;A0A0A0MSX3;A0A0G2JI85;A2ABL2;A0A0G2JIZ7;E7EQ30;E7EPH4;Q08345-4;A0A0G2JIA2;E7EPN2;E7EUP7;H0Y9F4;A2ABM8;E7ERI6;E7ETI3;H0Y717;E7EVT1;E7ES06;E7ETX3;E7EUD5;E7EVW6;E7ERN0;A0A0G2JHK4;E7ESR9;A2ABL0;E7EN94;H0YAH6;E7ENJ2;A0A0G2JJA0;E7EQ23;E7EX99;E7EXB0;D6R9C4;D6RB35;D6RB82;D6RBU7;D6RGW5	Q08345;Q08345-2;Q08345-6;Q08345-5;A0A0G2JNZ7;A0A0A0MSX3;A0A0G2JI85	Epithelial discoidin domain-containing receptor 1	DDR1	anatomical structure development;anatomical structure morphogenesis;biological adhesion;biological regulation;body fluid secretion;branching involved in mammary gland duct morphogenesis;branching morphogenesis of a tube;cell adhesion;cell migration;cell motility;cell-matrix adhesion;cell-substrate adhesion;cellular component movement;cellular component organization;cellular component organization…	adenyl nucleotide binding;adenyl ribonucleotide binding;ATP binding;binding;catalytic activity;cation binding;collagen binding;ion binding;kinase activity;metal ion binding;molecular transducer activity;nucleotide binding;phosphotransferase activity, alcohol group as acceptor;protein binding;protein kinase activity;protein tyrosine kinase activity;purine nucleotide binding;purine ribonucleoside t…	cell part;extracellular membrane-bounded organelle;extracellular organelle;extracellular region part;extracellular space;extracellular vesicular exosome;integral to membrane;integral to plasma membrane;intrinsic to membrane;intrinsic to plasma membrane;macromolecular complex;membrane;membrane part;membrane-bounded organelle;membrane-bounded vesicle;organelle;plasma membrane;plasma membrane part;p…	F5_F8_type_C;Pkinase_Tyr	40	38	46.1	44.4	101.13	0	323.31	78293000000	3.90736	3.98832	3.27164	4.30762	5.70175	5.68353	5.78688	5.56463	5.36296	5.63079	5.32535	5.39625	5.24756	5.32282	5.95189	5.6613	5.70081	5.77014	5.73852	5.41237	4.49489	4.21353	5.47685	5.38556	5.81481	5.92625	5.39047	5.50312	5.82063	5.57599	5.56379	5.72032	0.361498	1.44626
Q16832;Q5T245;Q5T244	Q16832	Discoidin domain-containing receptor 2	DDR2	anatomical structure development;biological adhesion;biological regulation;biomineral tissue development;cell adhesion;cell proliferation;cellular component organization;cellular component organization at cellular level;cellular component organization or biogenesis;cellular component organization or biogenesis at cellular level;cellular macromolecule metabolic process;cellular metabolic process;c…	adenyl nucleotide binding;adenyl ribonucleotide binding;ATP binding;binding;catalytic activity;collagen binding;kinase activity;molecular transducer activity;nucleotide binding;phosphotransferase activity, alcohol group as acceptor;protein binding;protein kinase activity;protein tyrosine kinase activity;purine nucleotide binding;purine ribonucleoside triphosphate binding;purine ribonucleotide bin…	adherens junction;anchoring junction;apical plasma membrane;cell junction;cell part;cell-substrate adherens junction;cell-substrate junction;extracellular membrane-bounded organelle;extracellular organelle;extracellular region part;extracellular vesicular exosome;focal adhesion;integral to membrane;integral to plasma membrane;intrinsic to membrane;intrinsic to plasma membrane;membrane;membrane pa…	F5_F8_type_C;Pkinase_Tyr	27	25	37	35.1	96.735	0	323.31	14089000000	0.747135	0.720749	0.225975	1.04842	3.31977	3.61092	3.45659	3.30132	3.14561	3.65299	2.9791	3.25232	2.61661	2.95252	3.52453	2.98281	3.21153	3.03208	2.91578	3.04305	2.36961	2.20918	2.73385	2.89663	2.88331	2.96735	2.59823	2.47225	3.31621	3.47773	2.87387	3.25844	-1.21158	-0.289522
Q13627-3;Q13627-4;Q13627-5;Q13627-2;Q13627;Q9Y463-2;Q9Y463-3;Q9Y463;E7EMI5;M0R2X3;M0R131	Q13627-3;Q13627-4;Q13627-5;Q13627-2;Q13627	Dual specificity tyrosine-phosphorylation-regulated kinase 1A	DYRK1A	adipose tissue development;anatomical structure development;anatomical structure formation involved in morphogenesis;biological regulation;cell cycle;cellular macromolecule metabolic process;cellular metabolic process;cellular process;cellular protein metabolic process;circadian rhythm;developmental process;macromolecule metabolic process;macromolecule modification;metabolic process;mitotic cell …	adenyl nucleotide binding;adenyl ribonucleotide binding;ATP binding;binding;catalytic activity;cytoskeletal protein binding;kinase activity;non-membrane spanning protein tyrosine kinase activity;nucleotide binding;phosphotransferase activity, alcohol group as acceptor;protein binding;protein binding transcription factor activity;protein kinase activity;protein self-association;protein serine/thre…	cell part;intracellular membrane-bounded organelle;intracellular organelle;intracellular organelle part;intracellular part;macromolecular complex;membrane-bounded organelle;nuclear body;nuclear part;nuclear speck;nucleoplasm;nucleoplasm part;nucleus;organelle;organelle part;ribonucleoprotein complex	Pkinase	9	9	25.5	25.5	60.329	0	74.231	782840000	NaN	-4.64741	-4.8381	NaN	-0.463581	-0.712133	-1.51263	-3.17923	-0.159578	-0.261904	-1.42847	-0.504601	-2.52148	-2.35293	-2.15091	-2.58172	-2.72553	-1.86959	-3.23008	-3.1356	-2.71579	-3.4928	-3.45386	-3.69861	-2.28123	-2.5387	-3.18364	-2.05242	-1.75283	-1.31488	-4.05871	-3.0091	-0.109842	0.126263
P00533;E9PFD7;Q504U8;A0A0B4J1Y5;P00533-4;P00533-3;P00533-2;C9JYS6;H3BLT0;P04626-6	P00533;E9PFD7;Q504U8;A0A0B4J1Y5;P00533-4;P00533-3	Epidermal growth factor receptor	EGFR	activation of phospholipase A2 activity;activation of phospholipase A2 activity by calcium-mediated signaling;activation of phospholipase C activity;alkanesulfonate metabolic process;anatomical structure development;anatomical structure morphogenesis;astrocyte activation;axon ensheathment;axon guidance;behavior;biological adhesion;biological regulation;biosynthetic process;calcium-mediated signal…	actin binding;actin filament binding;adenyl nucleotide binding;adenyl ribonucleotide binding;ATP binding;binding;catalytic activity;chromatin binding;cytoskeletal protein binding;DNA binding;double-stranded DNA binding;enzyme binding;epidermal growth factor-activated receptor activity;ErbB-3 class receptor binding;identical protein binding;kinase activity;MAP kinase kinase kinase activity;molecul…	adherens junction;anchoring junction;apical plasma membrane;basolateral plasma membrane;cell junction;cell part;cell surface;cell-substrate adherens junction;cell-substrate junction;cytoplasm;cytoplasmic membrane-bounded vesicle;cytoplasmic part;cytoplasmic vesicle;early endosome membrane;endocytic vesicle;endoplasmic reticulum membrane;endoplasmic reticulum part;endosomal part;endosome;endosome …	Furin-like;Pkinase_Tyr;Recep_L_domain	75	71	63.8	59.4	134.28	0	323.31	201310000000	5.86854	6.20064	5.5577	6.23255	6.69658	6.90662	6.91013	6.59773	6.57615	6.86739	6.89846	6.83836	6.17304	6.8049	6.64396	6.75319	6.5913	6.48848	6.67524	6.59372	6.00092	5.77251	6.40613	6.61349	6.57145	6.78948	5.90318	6.15986	6.78302	6.69908	6.59517	6.59266	6.48428	6.87326
Q9BQI3-2;Q9BQI3;F8WCM0;C9J7U7	Q9BQI3-2;Q9BQI3	Eukaryotic translation initiation factor 2-alpha kinase 1	EIF2AK1	biological regulation;cellular aromatic compound metabolic process;cellular macromolecule metabolic process;cellular metabolic process;cellular process;cellular protein metabolic process;cellular response to stimulus;cellular response to stress;cofactor metabolic process;heterocycle metabolic process;macromolecule metabolic process;macromolecule modification;metabolic process;negative regulation …	adenyl nucleotide binding;adenyl ribonucleotide binding;ATP binding;binding;catalytic activity;cation binding;eukaryotic translation initiation factor 2alpha kinase activity;heme binding;identical protein binding;ion binding;iron ion binding;kinase activity;metal ion binding;nucleotide binding;phosphotransferase activity, alcohol group as acceptor;protein binding;protein dimerization activity;pro…	cell part;cytoplasm;intracellular part	Pkinase	4	4	9.7	9.7	71.035	0.0024722	4.5481	167170000	NaN	NaN	NaN	NaN	NaN	NaN	NaN	NaN	NaN	-2.83449	-3.1385	NaN	NaN	NaN	-3.73016	NaN	NaN	NaN	NaN	NaN	NaN	NaN	NaN	NaN	NaN	NaN	NaN	NaN	NaN	NaN	NaN	NaN	NaN	-3.2953
P19525;P19525-2;C9JZT2;F8WBH4	P19525;P19525-2	Interferon-induced, double-stranded RNA-activated protein kinase	EIF2AK2	activation of MAPKK activity;activation of protein kinase activity;avoidance of defenses of other organism involved in symbiotic interaction;avoidance of host defenses;biological regulation;biosynthetic process;cellular biosynthetic process;cellular macromolecule biosynthetic process;cellular macromolecule metabolic process;cellular metabolic process;cellular nitrogen compound metabolic process;c…	adenyl nucleotide binding;adenyl ribonucleotide binding;ATP binding;binding;catalytic activity;double-stranded RNA binding;enzyme regulator activity;eukaryotic translation initiation factor 2alpha kinase activity;kinase activity;non-membrane spanning protein tyrosine kinase activity;nucleic acid binding;nucleotide binding;phosphatase regulator activity;phosphotransferase activity, alcohol group a…	cell part;cytoplasm;cytoplasmic part;cytosol;intracellular membrane-bounded organelle;intracellular non-membrane-bounded organelle;intracellular organelle;intracellular part;macromolecular complex;membrane;membrane-bounded organelle;non-membrane-bounded organelle;nucleus;organelle;perinuclear region of cytoplasm;ribonucleoprotein complex;ribosome	dsrm;Pkinase	12	12	32.5	32.5	62.094	0	323.01	3086300000	-0.225992	-0.174582	0.0827942	0.0722523	1.03974	1.41002	0.480772	0.978699	0.888805	0.876875	0.47374	0.959818	0.35848	0.806387	0.91963	0.420048	1.28589	0.634749	1.32281	0.903402	0.574692	0.486582	0.971233	0.599506	0.976358	0.641895	0.215595	0.267103	1.03542	1.17921	0.715485	1.01867	0.912891	1.46542
H0YME5;Q9P2K8-2;Q9P2K8	H0YME5;Q9P2K8-2;Q9P2K8	Eukaryotic translation initiation factor 2-alpha kinase 4	EIF2AK4	biological regulation;cell communication;cellular macromolecule metabolic process;cellular metabolic process;cellular process;cellular protein metabolic process;cellular response to chemical stimulus;cellular response to external stimulus;cellular response to extracellular stimulus;cellular response to nutrient levels;cellular response to organic substance;cellular response to starvation;cellular…	adenyl nucleotide binding;adenyl ribonucleotide binding;ATP binding;binding;catalytic activity;eukaryotic translation initiation factor 2alpha kinase activity;kinase activity;nucleotide binding;phosphotransferase activity, alcohol group as acceptor;protein kinase activity;protein serine/threonine kinase activity;purine nucleotide binding;purine ribonucleoside triphosphate binding;purine ribonucle…	cell part;cytoplasmic part;cytosolic part;cytosolic ribosome;intracellular non-membrane-bounded organelle;intracellular organelle;intracellular part;macromolecular complex;non-membrane-bounded organelle;organelle;ribonucleoprotein complex;ribosome	HGTP_anticodon2;Pkinase;RWD	2	2	2.7	2.7	161.12	0.004611	3.1769	14757000	NaN	NaN	NaN	NaN	NaN	-4.88847	NaN	NaN	NaN	NaN	NaN	NaN	NaN	NaN	NaN	NaN	NaN	NaN	NaN	NaN	NaN	NaN	NaN	NaN	NaN	NaN	NaN	NaN	NaN	NaN	NaN	NaN	NaN	NaN
P21709;P21709-3;P21709-2	P21709	Ephrin type-A receptor 1	EPHA1	anatomical structure formation involved in morphogenesis;anatomical structure morphogenesis;angiogenesis;axon guidance;biological adhesion;biological regulation;cell adhesion;cell morphogenesis;cell morphogenesis involved in differentiation;cell surface receptor linked signaling pathway;cell-substrate adhesion;cellular component morphogenesis;cellular component organization;cellular component org…	adenyl nucleotide binding;adenyl ribonucleotide binding;ATP binding;binding;catalytic activity;enzyme binding;ephrin receptor activity;kinase activity;kinase binding;molecular transducer activity;nucleotide binding;phosphotransferase activity, alcohol group as acceptor;protein binding;protein kinase activity;protein kinase binding;protein tyrosine kinase activity;purine nucleotide binding;purine …	cell part;integral to membrane;integral to plasma membrane;intrinsic to membrane;intrinsic to plasma membrane;membrane;membrane part;plasma membrane;plasma membrane part	EphA2_TM;Ephrin_lbd;fn3;Pkinase_Tyr;SAM_1	44	44	53.3	53.3	108.13	0	323.31	28421000000	2.89774	2.97417	1.92964	2.42205	4.59129	4.76411	4.13649	3.6673	4.22985	4.45274	4.25094	3.96287	2.51627	3.37801	3.71992	3.90523	3.38897	3.65908	3.25211	2.80622	1.67676	1.46257	2.88586	2.899	3.36049	3.71662	2.85782	2.58526	3.78523	3.60765	3.19568	3.67019	2.30346	2.43835
P29317;P29317-2;Q5JY90;U3NG26;Q06187	P29317	Ephrin type-A receptor 2	EPHA2	activation of immune response;activation of innate immune response;adaptive immune response;amine transport;anatomical structure development;anatomical structure formation involved in morphogenesis;anatomical structure morphogenesis;angiogenesis;antigen receptor-mediated signaling pathway;axial mesoderm formation;axon guidance;B cell activation;B cell receptor signaling pathway;biological adhesio…	adenyl nucleotide binding;adenyl ribonucleotide binding;ATP binding;binding;catalytic activity;cation binding;ephrin receptor activity;identical protein binding;ion binding;kinase activity;lipid binding;metal ion binding;molecular transducer activity;non-membrane spanning protein tyrosine kinase activity;nucleotide binding;phosphatidylinositol binding;phosphatidylinositol-3,4,5-trisphosphate bind…	adherens junction;anchoring junction;cell junction;cell part;cell projection membrane;cell projection part;cell surface;cell-substrate adherens junction;cell-substrate junction;cytoplasm;cytoplasmic part;cytoplasmic vesicle;cytosol;extrinsic to internal side of plasma membrane;extrinsic to membrane;extrinsic to plasma membrane;focal adhesion;integral to membrane;integral to plasma membrane;intrac…	BTK;EphA2_TM;Ephrin_lbd;fn3;PH;Pkinase_Tyr;SAM_1;SH2;SH3_1	93	90	87	85	108.27	0	323.31	481990000000	6.6242	7.04272	6.18088	6.78971	8.18738	8.46839	8.3977	8.34254	8.01647	8.14594	7.99757	8.1647	7.83161	7.93455	8.43746	8.36178	8.53188	8.0492	8.20225	7.96687	7.12909	6.58808	8.24025	8.02941	8.24541	8.19623	7.89421	7.89999	8.56154	8.33197	8.12735	8.27813	6.82153	7.03969
P54764;P54764-2;E9PG71;C9JEM6;F5GZZ5;C9JIX8;C9JFX5;H7C1N8	P54764;P54764-2;E9PG71	Ephrin type-A receptor 4	EPHA4	adult behavior;adult locomotory behavior;adult walking behavior;anatomical structure morphogenesis;axon guidance;axonal fasciculation;axonogenesis;behavior;biological adhesion;biological regulation;cell adhesion;cell migration;cell motility;cell part morphogenesis;cell projection morphogenesis;cell projection organization;cell recognition;cell surface receptor linked signaling pathway;cellular co…	adenyl nucleotide binding;adenyl ribonucleotide binding;ATP binding;binding;catalytic activity;ephrin receptor activity;GPI-linked ephrin receptor activity;kinase activity;molecular transducer activity;nucleotide binding;PH domain binding;phosphotransferase activity, alcohol group as acceptor;protein binding;protein domain specific binding;protein kinase activity;protein tyrosine kinase activity;…	axon;axon part;axon terminus;axonal growth cone;cell junction;cell part;cell projection;cell projection part;cell surface;cytoplasm;cytoplasmic part;cytoskeletal part;dendrite;dendritic spine;early endosome membrane;endoplasmic reticulum;endosomal part;endosome membrane;filopodium;Golgi apparatus;growth cone;integral to membrane;integral to plasma membrane;intracellular membrane-bounded organelle…	EphA2_TM;Ephrin_lbd;fn3;Pkinase_Tyr;SAM_2	33	29	54.9	46.9	109.86	0	323.31	13221000000	0.929306	1.82157	-0.0362339	1.33043	3.11936	2.89843	3.65183	3.18018	2.48313	2.97718	2.38954	2.30316	2.43243	3.22449	3.41267	3.42975	3.27206	3.31172	2.62003	2.98409	1.65359	1.13659	3.15992	3.22026	3.4316	3.72273	2.95353	2.8173	3.89829	3.55735	3.13954	3.26259	1.13455	1.22028
Q15375-4;Q15375;Q15375-2;Q15375-3;Q15375-5;J3KR66;Q9UF33-2;Q9UF33-3;J3KQG3;Q5JZY3-2;Q5JZY3-3;Q5JZY3	Q15375-4;Q15375;Q15375-2	Ephrin type-A receptor 7	EPHA7	anatomical structure development;anatomical structure morphogenesis;axon guidance;biological regulation;brain development;branching morphogenesis of a nerve;cell surface receptor linked signaling pathway;cellular macromolecule metabolic process;cellular metabolic process;cellular process;cellular protein metabolic process;cellular response to stimulus;chemotaxis;developmental process;enzyme linke…	adenyl nucleotide binding;adenyl ribonucleotide binding;ATP binding;axon guidance receptor activity;binding;catalytic activity;chemorepellent activity;ephrin receptor activity;GPI-linked ephrin receptor activity;kinase activity;molecular transducer activity;nucleotide binding;phosphotransferase activity, alcohol group as acceptor;protein kinase activity;protein tyrosine kinase activity;purine nuc…	cell body;cell part;cell projection;dendrite;extracellular membrane-bounded organelle;extracellular organelle;extracellular region part;extracellular vesicular exosome;integral to membrane;integral to plasma membrane;intracellular organelle part;intracellular part;intrinsic to membrane;intrinsic to plasma membrane;membrane;membrane part;membrane-bounded organelle;membrane-bounded vesicle;neuromus…	EphA2_TM;Ephrin_lbd;fn3;GCC2_GCC3;Pkinase_Tyr;SAM_1;SAM_2	34	26	50.8	40.5	111.62	0	323.31	12724000000	1.47136	2.09047	0.295179	1.51699	3.34496	3.47091	3.35586	2.77011	2.99612	3.37705	2.69389	2.75593	2.34519	2.50356	2.82473	2.89777	2.64854	2.6311	1.82855	1.28354	-1.88417	-1.41386	2.03161	1.59041	2.70872	2.86344	1.98486	2.49842	2.93606	2.67648	2.6017	2.51749	1.40808	2.83008
P54762-5;P54762;P29322	P54762-5;P54762	Ephrin type-B receptor 1	EPHB1	anatomical structure development;anatomical structure formation involved in morphogenesis;anatomical structure morphogenesis;angiogenesis;axon guidance;axonogenesis;biological adhesion;biological regulation;camera-type eye morphogenesis;cell adhesion;cell chemotaxis;cell differentiation;cell maturation;cell migration;cell motility;cell part morphogenesis;cell projection morphogenesis;cell project…	adenyl nucleotide binding;adenyl ribonucleotide binding;ATP binding;axon guidance receptor activity;binding;catalytic activity;ephrin receptor activity;GPI-linked ephrin receptor activity;kinase activity;molecular transducer activity;nucleotide binding;phosphotransferase activity, alcohol group as acceptor;protein kinase activity;protein tyrosine kinase activity;purine nucleotide binding;purine r…	axon;cell part;cell projection;cytoplasmic part;cytosol;dendrite;early endosome membrane;endosomal part;endosome membrane;extracellular membrane-bounded organelle;extracellular organelle;extracellular region;extracellular region part;extracellular vesicular exosome;integral to membrane;integral to plasma membrane;intracellular organelle part;intracellular part;intrinsic to membrane;intrinsic to p…	EphA2_TM;Ephrin_lbd;fn3;Pkinase_Tyr;SAM_1	13	4	29.2	12.7	61.401	0	26.872	241500000	NaN	NaN	NaN	NaN	-5.17101	-3.61631	-2.60671	-1.93593	-4.16965	-3.0738	-3.29625	-2.69042	NaN	-3.15975	NaN	-3.9601	NaN	-3.01829	-3.06802	-3.39914	NaN	NaN	NaN	-1.59265	-2.83478	-1.12154	NaN	-2.04901	NaN	-3.18206	NaN	-3.0553	NaN	NaN
P29323-2;P29323-3;P29323;B1AKC9;Q6NVW1	P29323-2;P29323-3;P29323;B1AKC9	Ephrin type-B receptor 2	EPHB2	anatomical structure development;anatomical structure formation involved in morphogenesis;anatomical structure morphogenesis;angiogenesis;axon guidance;axonal fasciculation;axonogenesis;behavior;biological regulation;camera-type eye morphogenesis;cell part morphogenesis;cell projection morphogenesis;cell projection organization;cell recognition;cell surface receptor linked signaling pathway;cellu…	adenyl nucleotide binding;adenyl ribonucleotide binding;ATP binding;axon guidance receptor activity;binding;catalytic activity;ephrin receptor activity;kinase activity;molecular transducer activity;nucleotide binding;phosphotransferase activity, alcohol group as acceptor;protein kinase activity;protein tyrosine kinase activity;purine nucleotide binding;purine ribonucleoside triphosphate binding;p…	axon;cell body;cell part;cell projection;cytoplasmic part;cytosol;dendrite;extracellular region;integral to membrane;integral to plasma membrane;intracellular part;intrinsic to membrane;intrinsic to plasma membrane;membrane;membrane part;neuron projection;neuronal cell body;plasma membrane;plasma membrane part	EphA2_TM;Ephrin_lbd;fn3;GCC2_GCC3;Pkinase_Tyr;SAM_1	52	43	63.9	56.7	109.87	0	323.31	40325000000	2.78415	3.17754	2.03166	2.86	4.43006	4.63121	5.29437	4.95927	4.02522	4.34189	4.20038	4.31622	4.39586	4.811	4.93183	5.02043	4.84461	4.84362	4.28184	4.16536	3.53436	3.06719	4.53258	4.63913	4.61059	4.90767	4.40979	4.42175	5.13176	4.99721	4.73666	5.05482	2.71685	3.30282
P54760;Q96L35;P54760-2;P54760-4;P54760-3	P54760;Q96L35;P54760-2	Ephrin type-B receptor 4	EPHB4	anatomical structure formation involved in morphogenesis;anatomical structure morphogenesis;angiogenesis;axon guidance;biological adhesion;biological regulation;blood vessel endothelial cell migration;cell adhesion;cell migration;cell migration involved in sprouting angiogenesis;cell motility;cell surface receptor linked signaling pathway;cellular component movement;cellular macromolecule metabol…	adenyl nucleotide binding;adenyl ribonucleotide binding;ATP binding;binding;catalytic activity;ephrin receptor activity;kinase activity;molecular transducer activity;nucleotide binding;phosphotransferase activity, alcohol group as acceptor;protein kinase activity;protein tyrosine kinase activity;purine nucleotide binding;purine ribonucleoside triphosphate binding;purine ribonucleotide binding;rec…	cell part;cytoplasmic part;cytosol;extracellular membrane-bounded organelle;extracellular organelle;extracellular region;extracellular region part;extracellular vesicular exosome;integral to membrane;integral to plasma membrane;intracellular part;intrinsic to membrane;intrinsic to plasma membrane;membrane;membrane part;membrane-bounded organelle;membrane-bounded vesicle;organelle;plasma membrane;…	EphA2_TM;Ephrin_lbd;fn3;GCC2_GCC3;Pkinase_Tyr;SAM_1	48	38	56.3	50.4	108.27	0	320.4	38637000000	2.95863	3.05288	2.38306	3.17944	4.67145	4.55588	4.94067	4.57559	3.99252	3.85946	3.99742	4.29162	4.51612	4.79946	5.08956	5.22023	4.8574	4.76368	4.49196	4.12929	3.18017	3.36326	4.64107	4.47045	4.86562	4.98574	4.52855	4.80775	5.35126	5.06194	4.86443	4.85573	2.01197	1.61326
F8WCM8;A0A0G2JNH7;O15197;J3KQU5;A0A0G2JNC5;O15197-3;O15197-2	F8WCM8;A0A0G2JNH7;O15197;J3KQU5;A0A0G2JNC5;O15197-3;O15197-2	Ephrin type-B receptor 6	EPHB6	axon guidance;biological regulation;calcium ion homeostasis;cation homeostasis;cell surface receptor linked signaling pathway;cellular process;cellular response to stimulus;chemical homeostasis;chemotaxis;divalent inorganic cation homeostasis;endocrine hormone secretion;enzyme linked receptor protein signaling pathway;ephrin receptor signaling pathway;establishment of localization;establishment o…	adenyl nucleotide binding;adenyl ribonucleotide binding;ATP binding;binding;catalytic activity;ephrin receptor activity;kinase activity;molecular transducer activity;nucleotide binding;phosphotransferase activity, alcohol group as acceptor;protein kinase activity;protein tyrosine kinase activity;purine nucleotide binding;purine ribonucleoside triphosphate binding;purine ribonucleotide binding;rec…	cell part;cytoplasmic part;cytosol;extracellular region;integral to membrane;integral to plasma membrane;intracellular part;intrinsic to membrane;intrinsic to plasma membrane;membrane;membrane part;plasma membrane;plasma membrane part	EphA2_TM;Ephrin_lbd;fn3;GCC2_GCC3;Pkinase_Tyr;SAM_2	3	3	7.1	7.1	110.77	0.00074516	10.941	635600000	NaN	NaN	NaN	NaN	-1.49537	-0.408796	NaN	NaN	0.0821877	-0.301485	-0.969154	-0.358444	NaN	NaN	NaN	NaN	NaN	NaN	NaN	NaN	-1.14596	-1.74039	NaN	NaN	NaN	NaN	-0.620594	NaN	-0.472511	NaN	NaN	NaN	-0.425857	NaN
P16591;P16591-2;A0A0D9SEV4;D6RAF9	P16591;P16591-2	Tyrosine-protein kinase Fer	FER	actin cytoskeleton organization;actin cytoskeleton reorganization;actin filament-based process;anatomical structure morphogenesis;biological adhesion;biological regulation;cell adhesion;cell adhesion mediated by integrin;cell communication;cell cycle;cell differentiation;cell migration;cell morphogenesis;cell morphogenesis involved in differentiation;cell motility;cell proliferation;cell surface …	adenyl nucleotide binding;adenyl ribonucleotide binding;ATP binding;binding;catalytic activity;epidermal growth factor receptor binding;growth factor receptor binding;kinase activity;lipid binding;non-membrane spanning protein tyrosine kinase activity;nucleotide binding;phosphotransferase activity, alcohol group as acceptor;protein binding;protein kinase activity;protein tyrosine kinase activity;…	cell cortex;cell junction;cell part;cell projection;cytoplasm;cytoplasmic part;cytoskeleton;cytosol;extrinsic to internal side of plasma membrane;extrinsic to membrane;extrinsic to plasma membrane;intracellular membrane-bounded organelle;intracellular non-membrane-bounded organelle;intracellular organelle;intracellular part;membrane part;membrane-bounded organelle;non-membrane-bounded organelle;n…	FCH;Pkinase_Tyr;SH2	106	39	88.7	42	94.637	0	323.31	1120400000000	8.20872	8.39226	7.56689	8.35504	9.13764	9.35427	9.15796	9.22667	9.21211	9.32962	9.20873	9.31033	9.35608	9.48626	9.51543	9.45212	9.34458	9.18209	9.32669	9.35599	8.99813	8.67734	9.09698	9.29126	9.28635	9.36736	9.19917	9.25965	9.76148	9.42338	9.17548	9.3142	9.00065	9.35177
E7EU09;P11362-6;P11362-5;P11362-4;P11362-14;P11362-3;P11362-20;P11362-7;P11362-2;P11362-19;P11362;P11362-21;P11362-13;P11362-12;P11362-11;P11362-10;P11362-9;P11362-8;E9PN14;B5A958;E9PNM3;C1KBH7;P11362-18;P11362-16	E7EU09;P11362-6;P11362-5;P11362-4;P11362-14;P11362-3;P11362-20;P11362-7;P11362-2;P11362-19;P11362;P11362-21;P11362-13;P11362-12;P11362-11;P11362-10;P11362-9;P11362-8	Fibroblast growth factor receptor;Fibroblast growth factor receptor 1	FGFR1	anatomical structure development;anatomical structure formation involved in morphogenesis;anatomical structure morphogenesis;angiogenesis;appendage morphogenesis;auditory receptor cell development;axon guidance;biological regulation;biosynthetic process;branching involved in salivary gland morphogenesis;cell communication;cell development;cell differentiation;cell division;cell maturation;cell mi…	adenyl nucleotide binding;adenyl ribonucleotide binding;ATP binding;binding;carbohydrate binding;catalytic activity;fibroblast growth factor binding;fibroblast growth factor-activated receptor activity;glycosaminoglycan binding;growth factor binding;heparin binding;identical protein binding;kinase activity;molecular transducer activity;nucleotide binding;pattern binding;phosphotransferase activit…	cell part;cytoplasmic membrane-bounded vesicle;cytoplasmic part;cytoplasmic vesicle;cytosol;extracellular region;integral to membrane;integral to plasma membrane;intracellular membrane-bounded organelle;intracellular organelle;intracellular part;intrinsic to membrane;intrinsic to plasma membrane;macromolecular complex;membrane;membrane part;membrane-bounded organelle;membrane-bounded vesicle;nucl…	I-set;Pkinase_Tyr	8	4	18.1	10	82.042	0	36.517	696840000	NaN	NaN	NaN	NaN	-0.41107	0.744822	-1.81549	-1.95652	-0.294758	0.0979309	-0.699585	-1.51818	-3.76174	-0.405239	-2.93814	-2.99845	-3.73337	-2.4479	NaN	-1.80062	-3.72991	-2.08317	-1.24116	-1.79897	-2.11793	-2.02256	-3.67329	-3.78037	-1.78967	-0.822773	-2.0958	-1.89512	-1.87504	-3.02093
A0A0A0MR25;P21802-15;P21802-8;P21802-2;P21802-13;P21802-17;P21802-12;P21802-6;P21802-7;P21802-9;P21802-5;P21802-10;P21802-18;P21802;P21802-3;P21802-16;P21802-11;H7BXU9;E7EVR7;D2CGD1;P21802-22;P21802-4;P21802-20;P21802-21;P21802-23;S4R381;H7C265;P21802-19;S4R3B2;P21802-14;A0A087WY21	A0A0A0MR25;P21802-15;P21802-8;P21802-2;P21802-13;P21802-17;P21802-12;P21802-6;P21802-7;P21802-9;P21802-5;P21802-10;P21802-18;P21802;P21802-3;P21802-16;P21802-11;H7BXU9;E7EVR7;D2CGD1;P21802-22;P21802-4;P21802-20;P21802-21;P21802-23;S4R381;H7C265	Fibroblast growth factor receptor 2;Fibroblast growth factor receptor	FGFR2	anatomical structure development;anatomical structure formation involved in morphogenesis;anatomical structure morphogenesis;angiogenesis;apoptosis;axis elongation;axonogenesis;biological regulation;biomineral tissue development;bone development;bone mineralization;bone morphogenesis;branch elongation involved in salivary gland morphogenesis;branch elongation of an epithelium;branching involved i…	adenyl nucleotide binding;adenyl ribonucleotide binding;ATP binding;binding;carbohydrate binding;catalytic activity;fibroblast growth factor binding;fibroblast growth factor-activated receptor activity;glycosaminoglycan binding;growth factor binding;heparin binding;identical protein binding;kinase activity;molecular transducer activity;nucleotide binding;pattern binding;phosphotransferase activit…	cell cortex;cell part;cell surface;cytoplasm;cytoplasmic membrane-bounded vesicle;cytoplasmic part;cytoplasmic vesicle;excitatory synapse;extracellular region;Golgi apparatus;integral to membrane;integral to plasma membrane;intracellular membrane-bounded organelle;intracellular organelle;intracellular organelle part;intracellular part;intrinsic to membrane;intrinsic to plasma membrane;membrane;me…	I-set;Pkinase_Tyr	13	10	20.8	17.5	92.07	0	187.86	3855900000	-0.478863	0.72069	-1.67391	0.034153	1.134	1.66012	1.03178	0.507982	1.50417	1.58489	1.58142	1.43917	0.0506764	0.697788	0.854118	0.650751	0.102356	-0.667509	0.673908	0.701794	0.206184	-0.662766	0.625009	0.729109	1.43186	0.950897	0.460136	0.346161	1.57208	1.05046	0.914932	1.57702	-0.164928	-0.633215
F8W9L4;P22607-3;P22607-4;P22607;P22607-2;J3KPQ0;P22455-3;P22455-2;P22455;H0YE20;H0Y9P2;I6LM06	F8W9L4;P22607-3;P22607-4;P22607;P22607-2	Fibroblast growth factor receptor;Fibroblast growth factor receptor 3	FGFR3	alveolar secondary septum development;anatomical structure development;anatomical structure maturation;anatomical structure morphogenesis;anion homeostasis;axon ensheathment;axon ensheathment in central nervous system;axonogenesis;axonogenesis involved in innervation;biological regulation;biomineral tissue development;bone maturation;bone mineralization;bone morphogenesis;carbohydrate homeostasis…	adenyl nucleotide binding;adenyl ribonucleotide binding;ATP binding;binding;carbohydrate binding;catalytic activity;fibroblast growth factor binding;fibroblast growth factor-activated receptor activity;glycosaminoglycan binding;growth factor binding;heparin binding;kinase activity;molecular transducer activity;nucleotide binding;pattern binding;phosphotransferase activity, alcohol group as accept…	cell part;cell surface;cytoplasm;cytoplasmic membrane-bounded vesicle;cytoplasmic part;cytoplasmic vesicle;endoplasmic reticulum;endosome;extracellular region;Golgi apparatus;integral to membrane;integral to plasma membrane;internal side of plasma membrane;intracellular membrane-bounded organelle;intracellular organelle;intracellular organelle part;intracellular part;intrinsic to membrane;intrins…	ig;I-set;Pkinase_Tyr	5	2	9.1	4.7	85.21	0	74.147	601480000	NaN	-1.35819	-3.46009	-1.91166	-2.65074	-0.741911	-3.19384	-2.95033	-0.541185	-3.0724	-3.20882	-3.12534	-1.33987	-0.582077	-0.38246	-0.406654	-0.977463	-3.53116	-2.98869	-3.36923	-3.50086	-1.27575	-2.98295	-3.89315	-0.821123	-0.941275	-1.18867	-0.572893	-0.797495	-3.14571	-3.16538	-3.38676	-2.53504	NaN
P35916;E9PD35;P35916-1;P35916-3;D6RFF2;B5A927	P35916;E9PD35;P35916-1	Vascular endothelial growth factor receptor 3	FLT4	anatomical structure development;anatomical structure formation involved in morphogenesis;anatomical structure morphogenesis;angiogenesis;biological regulation;blood vessel morphogenesis;cell surface receptor linked signaling pathway;cellular macromolecule metabolic process;cellular metabolic process;cellular process;cellular protein metabolic process;cellular response to chemical stimulus;cellul…	adenyl nucleotide binding;adenyl ribonucleotide binding;ATP binding;binding;catalytic activity;enzyme binding;growth factor binding;kinase activity;molecular transducer activity;nucleotide binding;phosphatase binding;phosphotransferase activity, alcohol group as acceptor;protein binding;protein kinase activity;protein phosphatase binding;protein tyrosine kinase activity;purine nucleotide binding;…	cell part;cytoplasm;extracellular region;integral to membrane;integral to plasma membrane;intracellular membrane-bounded organelle;intracellular organelle;intracellular part;intrinsic to membrane;intrinsic to plasma membrane;macromolecular complex;membrane;membrane part;membrane-bounded organelle;nucleus;organelle;plasma membrane;plasma membrane part;protein complex;receptor complex	I-set;Pkinase_Tyr	29	28	27.1	26.3	152.76	0	287.27	13943000000	1.09144	1.75901	0.119389	1.38916	3.39102	3.5491	2.69577	2.55022	3.16845	3.52505	3.33748	3.46405	2.30318	2.66605	2.90069	2.79769	2.47567	2.52836	2.42693	2.21328	1.61478	1.59966	2.43504	2.0739	2.7937	2.88434	2.3916	2.28144	3.24374	2.92841	2.67872	2.43856	2.95265	3.10588
P42685;P42685-2	P42685;P42685-2	Tyrosine-protein kinase FRK	FRK	actin cytoskeleton organization;actin filament-based process;biological regulation;cell differentiation;cell migration;cell motility;cell surface receptor linked signaling pathway;cellular component movement;cellular component organization;cellular component organization at cellular level;cellular component organization or biogenesis;cellular component organization or biogenesis at cellular level…	adenyl nucleotide binding;adenyl ribonucleotide binding;ATP binding;binding;catalytic activity;kinase activity;non-membrane spanning protein tyrosine kinase activity;nucleotide binding;phosphotransferase activity, alcohol group as acceptor;protein binding;protein kinase activity;protein tyrosine kinase activity;purine nucleotide binding;purine ribonucleoside triphosphate binding;purine ribonucleo…	cell part;cytoplasm;extracellular membrane-bounded organelle;extracellular organelle;extracellular region part;extracellular vesicular exosome;extrinsic to internal side of plasma membrane;extrinsic to membrane;extrinsic to plasma membrane;intracellular;intracellular membrane-bounded organelle;intracellular organelle;intracellular part;membrane part;membrane-bounded organelle;membrane-bounded ves…	Pkinase_Tyr;SH2;SH3_1	39	38	83.4	81.8	58.253	0	323.31	31518000000	2.4147	2.87728	0.962656	2.25563	4.23553	4.50535	4.27066	3.84886	4.35256	4.67065	4.22677	4.44459	3.40698	4.03864	4.20668	4.10698	3.90102	3.95158	4.0432	3.76219	3.42611	3.18844	3.80877	4.00797	3.84864	4.21403	3.27319	3.48979	4.20565	4.13299	3.75952	4.13169	4.01494	4.23146
P06241	P06241	Tyrosine-protein kinase Fyn	FYN	activated T cell proliferation;activation of immune response;activation of innate immune response;anatomical structure development;anatomical structure morphogenesis;antigen receptor-mediated signaling pathway;axon guidance;behavior;biological regulation;blood coagulation;calcium ion transport;cation transport;cell activation;cell differentiation;cell migration;cell motility;cell part morphogenes…	adenyl nucleotide binding;adenyl ribonucleotide binding;ATP binding;binding;catalytic activity;cation binding;ephrin receptor binding;glycoprotein binding;growth factor receptor binding;ion binding;kinase activity;metal ion binding;non-membrane spanning protein tyrosine kinase activity;nucleotide binding;phosphotransferase activity, alcohol group as acceptor;protein binding;protein kinase activit…	actin filament;cell part;cytoplasmic part;cytoskeletal part;cytosol;endosome;extrinsic to internal side of plasma membrane;extrinsic to membrane;extrinsic to plasma membrane;intracellular membrane-bounded organelle;intracellular organelle;intracellular organelle part;intracellular part;macromolecular complex;membrane;membrane part;membrane-bounded organelle;mitochondrion;nucleus;organelle;organel…	Pkinase_Tyr;SH2;SH3_1	48	7	74.3	12.3	60.761	0	323.31	61749000000	3.95857	3.93947	3.41169	4.11728	5.43852	5.61101	4.98033	4.64247	5.46522	5.47851	5.4409	5.49284	4.42684	4.41924	4.71568	4.85252	4.73924	4.7978	4.7207	4.72466	4.00391	3.71984	4.67818	4.65614	4.80868	4.85114	4.13922	4.21975	5.03745	4.82455	4.3179	4.59635	4.68033	4.97828
O14976;O14976-2;A0A087X1U9;D6RAW3;D6RC24;D6RE78;D6RAQ7;D6RF16;H0Y9M4;H0YA39	O14976;O14976-2	Cyclin-G-associated kinase	GAK	anatomical structure development;anatomical structure morphogenesis;biological regulation;cell cycle;cell development;cell differentiation;cellular component disassembly;cellular component disassembly at cellular level;cellular component organization;cellular component organization at cellular level;cellular component organization or biogenesis;cellular component organization or biogenesis at cel…	adenyl nucleotide binding;adenyl ribonucleotide binding;ATP binding;binding;catalytic activity;kinase activity;nucleotide binding;phosphotransferase activity, alcohol group as acceptor;protein kinase activity;protein serine/threonine kinase activity;purine nucleotide binding;purine ribonucleoside triphosphate binding;purine ribonucleotide binding;ribonucleotide binding;transferase activity;transf…	adherens junction;anchoring junction;cell junction;cell part;cell-substrate adherens junction;cell-substrate junction;cytoplasmic part;focal adhesion;Golgi apparatus;intracellular membrane-bounded organelle;intracellular organelle;intracellular part;membrane;membrane-bounded organelle;organelle;perinuclear region of cytoplasm	DnaJ;Pkinase;PTEN_C2	123	104	77	64.3	143.19	0	323.31	590690000000	6.83419	7.20559	6.20948	7.07867	8.48481	8.58297	8.41092	8.36413	8.44913	8.47926	8.45033	8.37621	8.04288	8.46348	8.64169	8.69691	8.40225	8.32372	8.43729	8.22093	7.93283	7.55767	8.34642	8.13323	8.41966	8.47451	8.05356	7.96716	8.83888	8.55051	8.25258	8.4589	8.28249	8.32687
P49840;A8MT37;M0QYV0	P49840;A8MT37	Glycogen synthase kinase-3 alpha	GSK3A	anatomical structure development;anatomical structure morphogenesis;biological regulation;carbohydrate metabolic process;cardiac chamber morphogenesis;cardiac left ventricle morphogenesis;cardiac ventricle morphogenesis;catabolic process;cell surface receptor linked signaling pathway;cellular carbohydrate metabolic process;cellular catabolic process;cellular glucan metabolic process;cellular macr…	adenyl nucleotide binding;adenyl ribonucleotide binding;ATP binding;binding;catalytic activity;enzyme binding;kinase activity;kinase binding;nucleotide binding;phosphotransferase activity, alcohol group as acceptor;protein binding;protein kinase A binding;protein kinase A catalytic subunit binding;protein kinase activity;protein kinase binding;protein serine/threonine kinase activity;purine nucle…	beta-catenin destruction complex;cell part;cytoplasmic part;cytosol;intracellular part;macromolecular complex;protein complex	Pkinase	52	32	77.2	64.4	50.98	0	323.31	450110000000	1.51319	1.59734	1.40809	2.31824	5.25233	5.5055	5.31671	5.22739	5.0395	5.0702	4.57356	4.7365	5.25591	5.55769	5.1038	4.58542	6.20146	6.06917	3.01922	2.84028	2.9001	2.14436	3.55751	3.04431	6.30545	6.48408	5.98798	6.21844	7.21529	7.02712	2.55367	2.03537	6.30903	6.29143
P49841-2;P49841	P49841-2;P49841	Glycogen synthase kinase-3 beta	GSK3B	anatomical structure development;anatomical structure formation involved in morphogenesis;anatomical structure morphogenesis;axon guidance;biological regulation;canonical Wnt receptor signaling pathway;canonical Wnt receptor signaling pathway involved in positive regulation of apoptosis;carbohydrate metabolic process;cell cycle process;cell differentiation;cell migration;cell morphogenesis;cell m…	adenyl nucleotide binding;adenyl ribonucleotide binding;ATP binding;beta-catenin binding;binding;catalytic activity;enzyme binding;kinase activity;kinase binding;NF-kappaB binding;nucleotide binding;p53 binding;phosphotransferase activity, alcohol group as acceptor;protein binding;protein kinase A binding;protein kinase A catalytic subunit binding;protein kinase activity;protein kinase binding;pr…	beta-catenin destruction complex;cell body;cell part;cell projection;cell projection part;centrosome;cytoplasm;cytoplasmic part;cytoskeletal part;cytosol;dendritic shaft;dendritic spine;growth cone;intracellular membrane-bounded organelle;intracellular non-membrane-bounded organelle;intracellular organelle;intracellular organelle part;intracellular part;macromolecular complex;membrane;membrane pa…	Pkinase	49	29	82.7	68.4	48.033	0	323.31	224620000000	0.23089	0.6872	0.481287	0.427023	4.31046	4.76828	4.78382	4.52296	5.188	5.41418	5.20013	5.05816	4.24997	5.06749	5.07833	4.90107	5.0999	5.47308	3.10236	2.73286	2.70486	2.45108	3.37647	3.5376	5.19569	5.68838	5.73129	6.09549	6.12017	6.2887	1.75738	2.47486	5.44214	5.85046
H0Y3C5;J3KPD6;P08631-3;P08631-2;P08631-4;P08631;E9PJ92	H0Y3C5;J3KPD6;P08631-3;P08631-2;P08631-4;P08631	Tyrosine-protein kinase HCK	HCK	activation of immune response;activation of innate immune response;anatomical structure development;biological adhesion;biological regulation;cell adhesion;cell differentiation;cell migration;cell motility;cell surface receptor linked signaling pathway;cellular component movement;cellular component organization;cellular component organization or biogenesis;cellular developmental process;cellular …	adenyl nucleotide binding;adenyl ribonucleotide binding;ATP binding;binding;catalytic activity;kinase activity;non-membrane spanning protein tyrosine kinase activity;nucleotide binding;phosphotransferase activity, alcohol group as acceptor;protein binding;protein kinase activity;protein tyrosine kinase activity;purine nucleotide binding;purine ribonucleoside triphosphate binding;purine ribonucleo…	adherens junction;anchoring junction;caveola;cell junction;cell part;cell projection;cell-substrate adherens junction;cell-substrate junction;cytoplasmic membrane-bounded vesicle;cytoplasmic part;cytoplasmic vesicle;cytoskeleton;cytosol;extrinsic to internal side of plasma membrane;extrinsic to membrane;extrinsic to plasma membrane;focal adhesion;Golgi apparatus;intracellular membrane-bounded org…	Pkinase_Tyr;SH2;SH3_1	7	1	8.6	2.1	59.51	0.00071891	9.3288	10120000000	0.445013	2.03481	0.302412	2.16471	3.31692	2.92633	2.65549	2.11266	2.89434	3.81488	2.9065	3.02837	2.04642	2.67226	2.89271	2.05487	1.69247	1.88654	1.77223	2.02151	1.37671	0.327951	2.03427	2.37362	1.77913	2.49251	1.68803	1.7145	2.42107	2.62129	1.85362	1.81135	1.87019	2.84601
H7BXX9;Q9H2X6-2;Q9H2X6-3;Q9H2X6;Q5SQL3;J3KP92;Q86Z02-2;Q86Z02;Q86Z02-4;Q86Z02-3;Q9H422-2;Q9H422	H7BXX9;Q9H2X6-2;Q9H2X6-3;Q9H2X6	Homeodomain-interacting protein kinase 2	HIPK2	adult behavior;adult locomotory behavior;adult walking behavior;anatomical structure development;anatomical structure formation involved in morphogenesis;anatomical structure morphogenesis;anterior/posterior pattern specification;apoptosis;behavior;biological regulation;biosynthetic process;cell communication;cell death;cell differentiation;cell surface receptor linked signaling pathway;cell-cell…	activating transcription factor binding;adenyl nucleotide binding;adenyl ribonucleotide binding;ATP binding;binding;catalytic activity;kinase activity;nucleotide binding;phosphotransferase activity, alcohol group as acceptor;protein binding;protein binding transcription factor activity;protein kinase activity;protein serine/threonine kinase activity;purine nucleotide binding;purine ribonucleoside…	cell part;cytoplasm;intracellular membrane-bounded organelle;intracellular organelle;intracellular organelle part;intracellular part;membrane-bounded organelle;nuclear body;nuclear part;nuclear speck;nucleoplasm part;nucleus;organelle;organelle part;PML body	Pkinase	5	5	10.6	10.6	100.24	0	14.228	140760000	NaN	NaN	NaN	NaN	-2.80771	-1.66091	NaN	NaN	-2.8644	-2.07247	NaN	-4.8771	NaN	NaN	NaN	NaN	NaN	NaN	NaN	NaN	NaN	NaN	NaN	NaN	NaN	NaN	NaN	NaN	NaN	NaN	NaN	NaN	-3.43527	-2.60735
C9J5X1;P08069;H0YNR0;H0YMJ5;H3BSZ8	C9J5X1;P08069	Tyrosine-protein kinase receptor;Insulin-like growth factor 1 receptor;Insulin-like growth factor 1 receptor alpha chain;Insulin-like growth factor 1 receptor beta chain	IGF1R	anatomical structure development;anatomical structure morphogenesis;axonogenesis;biological regulation;brain development;cell part morphogenesis;cell projection morphogenesis;cell projection organization;cell surface receptor linked signaling pathway;cellular component assembly;cellular component morphogenesis;cellular component organization;cellular component organization at cellular level;cellu…	adenyl nucleotide binding;adenyl ribonucleotide binding;ATP binding;binding;catalytic activity;enzyme binding;growth factor binding;hormone binding;identical protein binding;insulin binding;insulin receptor binding;insulin receptor substrate binding;insulin-like growth factor binding;insulin-like growth factor I binding;insulin-like growth factor-activated receptor activity;kinase activity;kinase…	caveola;cell part;cell projection;integral to membrane;integral to plasma membrane;intracellular membrane-bounded organelle;intracellular organelle;intracellular part;intrinsic to membrane;intrinsic to plasma membrane;macromolecular complex;membrane;membrane part;membrane raft;membrane-bounded organelle;neuron projection;organelle;plasma membrane;plasma membrane part;protein complex;receptor comp…	fn3;Furin-like;Pkinase_Tyr;Recep_L_domain	65	55	49.3	46	154.79	0	323.31	66695000000	4.45223	4.54043	3.85131	4.68625	5.33804	5.44913	5.16886	4.75141	5.21026	5.37906	5.1085	5.22731	4.45552	5.06781	5.04805	5.11495	4.91544	4.8869	4.93393	4.98943	4.5012	4.30026	4.74072	4.81043	4.77538	5.10976	4.13241	4.45526	5.3339	5.20765	4.76914	4.88938	5.25387	5.6407
G3V105;O14920-4;O14920-2;O14920;E5RGW5;O14920-3	G3V105;O14920-4;O14920-2;O14920;E5RGW5;O14920-3	Inhibitor of nuclear factor kappa-B kinase subunit beta	IKBKB	activation of immune response;activation of innate immune response;antigen receptor-mediated signaling pathway;B cell homeostasis;biological regulation;cell surface receptor linked signaling pathway;cellular macromolecule metabolic process;cellular metabolic process;cellular process;cellular protein metabolic process;cellular response to chemical stimulus;cellular response to cytokine stimulus;ce…	adenyl nucleotide binding;adenyl ribonucleotide binding;ATP binding;binding;catalytic activity;enzyme binding;identical protein binding;IkappaB kinase activity;kinase activity;kinase binding;nucleotide binding;phosphotransferase activity, alcohol group as acceptor;protein binding;protein dimerization activity;protein heterodimerization activity;protein homodimerization activity;protein kinase act…	CD40 receptor complex;cell part;cytoplasm;cytoplasmic part;cytosol;cytosolic part;IkappaB kinase complex;internal side of plasma membrane;intracellular membrane-bounded organelle;intracellular organelle;intracellular part;macromolecular complex;membrane part;membrane raft;membrane-bounded organelle;nucleus;organelle;plasma membrane part;protein complex;receptor complex	IKKbetaNEMObind;Pkinase	4	4	16	16	63.739	0.0012987	5.8848	70929000	NaN	NaN	-2.93861	NaN	-3.52384	NaN	NaN	NaN	-4.23635	-4.39488	NaN	-3.6142	NaN	NaN	NaN	NaN	NaN	NaN	NaN	NaN	NaN	NaN	NaN	NaN	NaN	NaN	NaN	NaN	NaN	NaN	NaN	NaN	-3.92356	NaN
Q14164;A0A075B7B4;Q14164-2;A0A075B7C7	Q14164;A0A075B7B4;Q14164-2	Inhibitor of nuclear factor kappa-B kinase subunit epsilon	IKBKE	activation of immune response;activation of innate immune response;biological regulation;cellular macromolecule metabolic process;cellular metabolic process;cellular process;cellular protein metabolic process;cellular response to stimulus;cellular response to stress;defense response;DNA damage response, signal transduction resulting in induction of apoptosis;immune response;immune response-activa…	adenyl nucleotide binding;adenyl ribonucleotide binding;ATP binding;binding;catalytic activity;IkappaB kinase activity;kinase activity;molecular transducer activity;NF-kappaB-inducing kinase activity;nucleotide binding;phosphotransferase activity, alcohol group as acceptor;protein kinase activity;protein serine/threonine kinase activity;purine nucleotide binding;purine ribonucleoside triphosphate…	cell part;cytoplasm;cytoplasmic part;cytosol;endosomal part;endosome membrane;intracellular membrane-bounded organelle;intracellular organelle;intracellular organelle part;intracellular part;membrane;membrane-bounded organelle;mitochondrial membrane;mitochondrial part;nuclear body;nuclear part;nucleoplasm;nucleoplasm part;nucleus;organelle;organelle membrane;organelle part;PML body	Pkinase	7	4	15.1	9.2	80.461	0	49.782	499670000	NaN	-1.4741	NaN	NaN	-0.865272	-2.65509	-1.85286	-2.08903	-1.28493	-1.62314	-0.267559	-1.07122	-1.88386	-1.60793	-1.45202	-1.50159	NaN	-2.00337	-2.14224	-2.13917	-4.13008	-2.65639	NaN	-3.03173	-3.48204	-2.0753	-2.10569	-0.956976	-2.56133	-2.23438	NaN	-2.01001	-0.586828	-0.946854
P06213	P06213	Insulin receptor;Insulin receptor subunit alpha;Insulin receptor subunit beta	INSR	activation of MAPK activity;activation of protein kinase activity;activation of protein kinase B activity;anatomical structure development;anatomical structure morphogenesis;biological regulation;carbohydrate homeostasis;carbohydrate metabolic process;cell surface receptor linked signaling pathway;cellular component assembly;cellular component organization;cellular component organization or bioge…	adenyl nucleotide binding;adenyl ribonucleotide binding;ATP binding;binding;catalytic activity;enzyme binding;growth factor binding;GTP binding;guanyl nucleotide binding;guanyl ribonucleotide binding;hormone binding;insulin binding;insulin receptor substrate binding;insulin-activated receptor activity;insulin-like growth factor binding;insulin-like growth factor I binding;insulin-like growth fact…	caveola;cell part;cytoplasmic part;endosomal part;endosome membrane;extracellular membrane-bounded organelle;extracellular organelle;extracellular region part;extracellular vesicular exosome;insulin receptor complex;integral to membrane;integral to plasma membrane;intracellular membrane-bounded organelle;intracellular organelle;intracellular organelle part;intracellular part;intrinsic to membrane…	fn3;Furin-like;Pkinase_Tyr;Recep_L_domain	69	1	51.7	1.1	156.33	0	323.31	91378000000	4.53324	4.97362	4.06508	5.00743	5.70458	5.8667	5.73116	5.67029	5.76987	5.69981	5.52928	5.6023	4.92699	5.48451	5.68006	5.50636	5.73685	5.55039	5.80803	5.59802	5.14611	4.94994	5.74532	5.45012	5.56135	5.76741	4.91054	5.11635	5.8979	6.14254	5.49489	5.70548	5.80494	6.07066
P51617;P51617-2;D3YTB5;P51617-4;P51617-3;H7C224;H7C2I6;F8WAB6;H7C1F0;H7C3C1;H7C3G8	P51617;P51617-2;D3YTB5;P51617-4;P51617-3;H7C224	Interleukin-1 receptor-associated kinase 1	IRAK1	activation of immune response;activation of innate immune response;activation of MAPK activity;activation of NF-kappaB-inducing kinase activity;activation of protein kinase activity;aging;biological regulation;cell surface receptor linked signaling pathway;cellular component assembly;cellular component organization;cellular component organization or biogenesis;cellular macromolecule metabolic pro…	acid-amino acid ligase activity;adenyl nucleotide binding;adenyl ribonucleotide binding;ATP binding;binding;catalytic activity;identical protein binding;kinase activity;ligase activity;ligase activity, forming carbon-nitrogen bonds;molecular transducer activity;NF-kappaB-inducing kinase activity;nucleotide binding;phosphotransferase activity, alcohol group as acceptor;protein binding;protein dime…	cell part;cytoplasm;cytoplasmic part;cytosol;endosomal part;endosome membrane;interleukin-1 receptor complex;intracellular membrane-bounded organelle;intracellular organelle;intracellular organelle part;intracellular part;lipid particle;macromolecular complex;membrane;membrane part;membrane-bounded organelle;nucleus;organelle;organelle membrane;organelle part;plasma membrane;plasma membrane part;…	Death;Pkinase;Pkinase_Tyr	34	33	64	62.9	76.536	0	323.31	19894000000	1.87246	2.32578	1.59381	2.56953	3.24662	3.51042	3.72362	2.93458	3.45534	3.50526	3.62164	3.46049	3.01954	3.56654	3.60663	3.85466	3.52531	3.12008	3.70454	2.97122	3.11452	2.97546	3.23444	3.05559	3.23797	2.90312	2.62604	3.01942	3.78299	3.27891	2.89805	3.17471	3.52616	3.69156
Q9NWZ3;Q9NWZ3-2;F8VR40;F8VW24;F8VVZ1	Q9NWZ3;Q9NWZ3-2	Interleukin-1 receptor-associated kinase 4	IRAK4	activation of immune response;activation of innate immune response;biological regulation;cell surface receptor linked signaling pathway;cellular process;cellular response to chemical stimulus;cellular response to cytokine stimulus;cellular response to organic substance;cellular response to stimulus;cellular response to stress;cytokine production;cytokine-mediated signaling pathway;defense respons…	adenyl nucleotide binding;adenyl ribonucleotide binding;ATP binding;binding;catalytic activity;cation binding;ion binding;kinase activity;magnesium ion binding;metal ion binding;nucleotide binding;phosphotransferase activity, alcohol group as acceptor;protein kinase activity;protein serine/threonine kinase activity;purine nucleotide binding;purine ribonucleoside triphosphate binding;purine ribonu…	cell part;cytoplasm;cytoplasmic part;cytosol;endosomal part;endosome membrane;extracellular region part;extracellular space;intracellular membrane-bounded organelle;intracellular organelle;intracellular organelle part;intracellular part;membrane;membrane-bounded organelle;nucleus;organelle;organelle membrane;organelle part;plasma membrane	Pkinase	40	40	67.2	67.2	51.529	0	323.31	44694000000	3.54563	3.81502	2.93062	3.8095	4.58131	4.67685	4.90888	4.74307	4.31046	4.63959	4.22567	4.72802	4.53709	5.11146	4.865	4.89503	4.59902	4.70046	4.87842	4.87301	4.14474	4.04957	4.7133	4.7978	4.83121	4.91488	4.2614	4.5838	4.61205	4.83467	4.66055	4.88218	4.6418	5.0592
P23458	P23458	Tyrosine-protein kinase JAK1	JAK1	biological regulation;cell differentiation;cell migration;cell motility;cell surface receptor linked signaling pathway;cellular component movement;cellular developmental process;cellular macromolecule metabolic process;cellular metabolic process;cellular process;cellular protein metabolic process;cellular response to chemical stimulus;cellular response to cytokine stimulus;cellular response to in…	adenyl nucleotide binding;adenyl ribonucleotide binding;ATP binding;binding;catalytic activity;cytokine receptor binding;enzyme binding;growth hormone receptor binding;hormone receptor binding;kinase activity;non-membrane spanning protein tyrosine kinase activity;nucleotide binding;phosphatase binding;phosphotransferase activity, alcohol group as acceptor;protein binding;protein kinase activity;p…	adherens junction;anchoring junction;cell junction;cell part;cell-substrate adherens junction;cell-substrate junction;cytoplasm;cytoplasmic part;cytoskeleton;cytosol;endomembrane system;extrinsic to internal side of plasma membrane;extrinsic to membrane;extrinsic to plasma membrane;focal adhesion;intracellular membrane-bounded organelle;intracellular non-membrane-bounded organelle;intracellular o…	Pkinase_Tyr	104	103	80	79.3	133.28	0	323.31	246710000000	6.7486	6.62076	5.91339	6.6876	6.56804	6.54162	7.4135	7.43681	6.49956	6.66139	6.56686	6.49367	7.27273	7.47731	7.48824	7.54126	7.3712	7.24829	7.75587	7.53361	6.88218	6.32817	7.40489	7.37966	7.48935	7.57385	7.01522	7.14454	7.74482	7.53761	7.24968	7.37591	6.45963	6.77047
O60674	O60674	Tyrosine-protein kinase JAK2	JAK2	actin cytoskeleton organization;actin filament organization;actin filament polymerization;actin filament-based process;actin polymerization or depolymerization;activation of caspase activity;activation of JAK2 kinase activity;activation of Janus kinase activity;activation of MAPKK activity;activation of protein kinase activity;anatomical structure development;anatomical structure morphogenesis;ap…	adenyl nucleotide binding;adenyl ribonucleotide binding;ATP binding;binding;catalytic activity;cation binding;cytokine receptor binding;enzyme binding;growth factor receptor binding;growth hormone receptor binding;heme binding;histone binding;histone kinase activity;histone kinase activity (H3-Y41 specific);histone tyrosine kinase activity;hormone receptor binding;interleukin-12 receptor binding;…	caveola;cell part;cytoplasm;cytoplasmic part;cytoskeleton;cytosol;endosomal part;endosome lumen;extrinsic to internal side of plasma membrane;extrinsic to membrane;extrinsic to plasma membrane;intracellular membrane-bounded organelle;intracellular non-membrane-bounded organelle;intracellular organelle;intracellular organelle lumen;intracellular organelle part;intracellular part;membrane part;memb…	Pkinase_Tyr;SH2	6	5	8.7	8	130.67	0.00070522	8.6757	668150000	NaN	-2.73853	NaN	-3.10099	NaN	NaN	-0.172699	0.122278	-2.8731	NaN	-3.26597	-2.19495	-0.847609	-0.738018	-0.620365	-0.989605	-1.1643	-0.582285	-0.178169	-0.471384	-1.93236	-2.24807	0.362057	-0.354799	-0.129898	-0.559133	-0.924295	-1.6904	-0.431452	-1.13211	0	-1.55933	-2.8614	-2.40663
O95835;O95835-2;Q6PJG3;H0YG09	O95835	Serine/threonine-protein kinase LATS1	LATS1	biological regulation;cell cycle phase;cell cycle process;cell differentiation;cell division;cellular component organization;cellular component organization at cellular level;cellular component organization or biogenesis;cellular component organization or biogenesis at cellular level;cellular developmental process;cellular macromolecule metabolic process;cellular metabolic process;cellular proces…	adenyl nucleotide binding;adenyl ribonucleotide binding;ATP binding;binding;catalytic activity;cation binding;enzyme binding;ion binding;kinase activity;kinase binding;magnesium ion binding;metal ion binding;nucleotide binding;phosphotransferase activity, alcohol group as acceptor;protein binding;protein kinase activity;protein kinase binding;protein serine/threonine kinase activity;purine nucleo…	cell part;cytoplasmic part;cytoskeletal part;cytosol;intracellular organelle part;intracellular part;microtubule organizing center;organelle part;spindle pole	Pkinase;UBA	33	31	40	38.2	126.87	0	323.31	47159000000	3.03867	3.56846	2.22983	3.36557	4.59476	4.66601	4.99116	6.24944	4.50939	4.65829	4.39681	4.51626	4.70787	6.19643	5.91854	4.82198	5.28702	4.93229	5.54394	5.5102	4.86064	3.65431	4.46099	6.76106	6.80753	5.31412	6.57659	5.12249	7.24091	5.28431	5.39192	3.52142	5.73064	4.5649
P53667-2;E9PC47;P53667;P53667-4;P53667-3	P53667-2;E9PC47;P53667;P53667-4	LIM domain kinase 1	LIMK1	actin cytoskeleton organization;actin filament-based process;anatomical structure development;axon guidance;biological regulation;cell surface receptor linked signaling pathway;cellular component organization;cellular component organization at cellular level;cellular component organization or biogenesis;cellular component organization or biogenesis at cellular level;cellular macromolecule metabol…	adenyl nucleotide binding;adenyl ribonucleotide binding;ATP binding;binding;catalytic activity;cation binding;heat shock protein binding;ion binding;kinase activity;metal ion binding;nucleotide binding;phosphotransferase activity, alcohol group as acceptor;protein binding;protein kinase activity;protein serine/threonine kinase activity;purine nucleotide binding;purine ribonucleoside triphosphate …	adherens junction;anchoring junction;cell junction;cell part;cell projection;cell-substrate adherens junction;cell-substrate junction;cytoplasm;cytoplasmic part;cytosol;focal adhesion;intracellular organelle part;intracellular part;neuron projection;nuclear part;nucleoplasm;organelle part	LIM;PDZ;Pkinase_Tyr	27	26	56.6	55.5	70.792	0	181.62	12516000000	-0.241596	-0.20454	-0.592032	0.51392	3.80722	4.27782	0.916889	1.26065	3.50536	2.83061	2.46293	2.68872	-0.0111294	0.282206	1.19566	1.43998	-0.857639	-0.792805	-0.15399	-1.00628	0.446566	0.49601	1.82441	1.29755	1.56846	1.07923	1.95233	2.12888	1.37712	1.44655	1.41655	2.06506	-1.7896	-2.53248
P07948;E5RJ37	P07948	Tyrosine-protein kinase Lyn	LYN	activation of immune response;activation of innate immune response;amine transport;anatomical structure development;antigen receptor-mediated signaling pathway;axon guidance;B cell homeostasis;B cell receptor signaling pathway;biological regulation;blood coagulation;cell activation;cell communication;cell development;cell differentiation;cell migration;cell motility;cell surface receptor linked s…	adenyl nucleotide binding;adenyl ribonucleotide binding;ATP binding;binding;catalytic activity;enzyme binding;glycolipid binding;glycosphingolipid binding;ion channel binding;kinase activity;lipid binding;molecular transducer activity;non-membrane spanning protein tyrosine kinase activity;nucleotide binding;phosphotransferase activity, alcohol group as acceptor;protein binding;protein kinase acti…	alpha2-beta1 integrin complex;cell part;cytoplasm;cytoplasmic part;cytoskeletal part;cytosol;extracellular membrane-bounded organelle;extracellular organelle;extracellular region part;extracellular vesicular exosome;extrinsic to internal side of plasma membrane;extrinsic to membrane;extrinsic to plasma membrane;Golgi apparatus;integrin complex;intracellular membrane-bounded organelle;intracellula…	Pkinase_Tyr;SH2;SH3_1	61	4	86.9	9.8	58.573	0	323.31	348950000000	6.79917	6.88009	6.15205	6.86001	8.07344	8.14433	7.0614	7.00631	8.05469	8.32708	8.03155	8.15945	6.88968	7.21994	7.26956	7.04779	6.84368	6.72414	6.93203	6.88032	6.17956	5.78082	6.91598	6.98704	6.87311	7.09772	6.6798	6.79667	7.31528	7.15385	6.7022	6.95997	7.2875	7.60262
Q02750;Q02750-2;H3BRW9	Q02750;Q02750-2	Dual specificity mitogen-activated protein kinase kinase 1	MAP2K1	activation of immune response;activation of innate immune response;activation of MAPK activity;activation of MAPKK activity;activation of protein kinase activity;aging;anatomical structure development;axon guidance;biological regulation;blood vessel development;cell aging;cell cycle arrest;cell cycle phase;cell cycle process;cell differentiation;cell motility;cell proliferation;cell surface recep…	adenyl nucleotide binding;adenyl ribonucleotide binding;ATP binding;binding;catalytic activity;enzyme activator activity;enzyme regulator activity;hydrolase activity;hydrolase activity, acting on ester bonds;kinase activator activity;kinase activity;kinase regulator activity;MAP kinase kinase activity;molecular transducer activity;nucleotide binding;phosphatase activity;phosphoprotein phosphatase…	adherens junction;anchoring junction;axon;cell cortex;cell junction;cell part;cell projection;cell projection cytoplasm;cell projection part;cell-substrate adherens junction;cell-substrate junction;cytoplasm;cytoplasmic part;cytoskeletal part;cytosol;dendrite cytoplasm;early endosome;endoplasmic reticulum;endosome;extracellular membrane-bounded organelle;extracellular organelle;extracellular regi…	Pkinase	36	24	87.8	71.5	43.439	0	323.31	155460000000	6.03171	6.22879	5.57502	6.1774	6.90476	7.01228	5.58225	5.66241	6.74277	7.09055	6.68536	6.65675	4.9916	5.54125	5.56053	5.64566	5.3907	5.57117	5.63582	5.65627	5.0256	4.79968	5.1575	5.46769	5.42293	5.47334	4.7961	5.09242	5.82084	5.90332	5.17855	5.56666	6.88126	7.00833
P36507;G5E9C7;M0R1B6	P36507;G5E9C7	Dual specificity mitogen-activated protein kinase kinase 2	MAP2K2	activation of immune response;activation of innate immune response;activation of MAPK activity;activation of MAPKK activity;activation of protein kinase activity;axon guidance;biological regulation;cell surface receptor linked signaling pathway;cellular macromolecule metabolic process;cellular metabolic process;cellular process;cellular protein metabolic process;cellular response to chemical stim…	adenyl nucleotide binding;adenyl ribonucleotide binding;ATP binding;binding;catalytic activity;enzyme activator activity;enzyme regulator activity;kinase activator activity;kinase activity;kinase regulator activity;MAP kinase kinase activity;nucleotide binding;PDZ domain binding;phosphotransferase activity, alcohol group as acceptor;protein binding;protein domain specific binding;protein kinase a…	adherens junction;anchoring junction;cell cortex;cell junction;cell part;cell-cell junction;cell-substrate adherens junction;cell-substrate junction;cytoplasm;cytoplasmic part;cytoskeletal part;cytosol;early endosome;endoplasmic reticulum;endosome;extracellular region;focal adhesion;Golgi apparatus;internal side of plasma membrane;intracellular membrane-bounded organelle;intracellular organelle;i…	Pkinase	35	23	68.8	52.8	44.424	0	323.31	50533000000	4.53282	4.61889	3.54434	4.71709	5.24048	5.44587	4.00301	3.99792	5.07761	5.23904	4.68685	5.25096	3.84953	4.30844	4.71052	4.20744	4.4632	4.32937	4.57063	4.26306	4.14851	3.25773	4.45472	3.95842	4.41216	4.01564	3.4625	3.72934	4.1172	4.32802	4.3552	4.33715	4.89092	5.22452
P46734;P46734-2;P46734-3;E9PRZ0;J3QR49;X6RB39;J3QL77;E9PMA8;J3KRV4	P46734;P46734-2;P46734-3	Dual specificity mitogen-activated protein kinase kinase 3	MAP2K3	activation of immune response;activation of innate immune response;activation of MAPK activity;biological regulation;cardiac muscle contraction;cellular macromolecule metabolic process;cellular metabolic process;cellular process;cellular protein metabolic process;cellular response to stimulus;cellular response to stress;defense response;immune response;immune response-activating signal transducti…	adenyl nucleotide binding;adenyl ribonucleotide binding;ATP binding;binding;catalytic activity;enzyme binding;kinase activity;kinase binding;MAP kinase kinase activity;nucleotide binding;phosphotransferase activity, alcohol group as acceptor;protein binding;protein kinase activity;protein kinase binding;protein serine/threonine kinase activity;protein serine/threonine/tyrosine kinase activity;pro…	cell part;cytoplasm;cytoplasmic part;cytosol;intracellular organelle part;intracellular part;membrane;nuclear part;nucleoplasm;organelle part	Pkinase	11	7	51.3	37.2	39.318	0	92.406	1410400000	-1.81165	-0.369516	-1.0532	-2.36879	0.572403	-1.31801	-0.967545	-0.763359	0.11627	-1.19409	-0.409008	0.338446	-0.767328	-1.62509	-0.219671	0.00599289	-1.41001	-1.70623	-0.238771	-0.730772	-1.9287	-1.83569	-1.49071	-1.92214	-1.01991	-0.930855	-0.915768	0.15192	-0.734249	-1.54365	-0.347942	-1.57412	-0.595373	-0.770529
P45985;P45985-2;R4GN37	P45985;P45985-2	Dual specificity mitogen-activated protein kinase kinase 4	MAP2K4	activation of immune response;activation of innate immune response;activation of JUN kinase activity;activation of MAPK activity;apoptosis;biological regulation;cell death;cell growth;cell growth involved in cardiac muscle cell development;cellular macromolecule metabolic process;cellular metabolic process;cellular process;cellular protein metabolic process;cellular response to abiotic stimulus;c…	adenyl nucleotide binding;adenyl ribonucleotide binding;ATP binding;binding;catalytic activity;JUN kinase kinase activity;kinase activity;MAP kinase kinase activity;nucleotide binding;phosphotransferase activity, alcohol group as acceptor;protein kinase activity;protein serine/threonine kinase activity;protein serine/threonine/tyrosine kinase activity;protein tyrosine kinase activity;purine nucle…	axon;cell part;cell projection;cell projection cytoplasm;cell projection part;cytoplasmic part;cytosol;dendrite cytoplasm;intracellular;intracellular membrane-bounded organelle;intracellular organelle;intracellular part;membrane-bounded organelle;neuron projection;nucleus;organelle;perikaryon	Pkinase	12	12	49.4	49.4	44.287	0	26.279	1274800000	NaN	NaN	-3.38893	-2.25365	0.0701027	-0.115606	-0.351437	-0.807169	-0.736553	-0.0273228	-0.0429707	-0.235189	-1.8038	-1.23006	-0.605974	-0.0193443	-0.402735	-0.200937	-1.21542	-0.619732	-1.36966	-1.43748	-1.61586	-2.45017	-0.458365	-2.49748	-1.11076	-0.0597324	-2.96158	-0.122797	-1.89637	-0.35824	-0.11352	0.313295
Q13163;Q13163-2;Q13163-3;Q13163-4;A0A087WWX7;A6NK28;H7BZL1	Q13163;Q13163-2;Q13163-3;Q13163-4;A0A087WWX7	Dual specificity mitogen-activated protein kinase kinase 5	MAP2K5	activation of MAPK activity;anatomical structure development;biological regulation;BMK cascade;cell surface receptor linked signaling pathway;cellular macromolecule metabolic process;cellular metabolic process;cellular process;cellular protein metabolic process;cellular response to chemical stimulus;cellular response to fluid shear stress;cellular response to growth factor stimulus;cellular respo…	adenyl nucleotide binding;adenyl ribonucleotide binding;ATP binding;binding;catalytic activity;cation binding;ion binding;kinase activity;MAP kinase kinase activity;metal ion binding;nucleotide binding;phosphotransferase activity, alcohol group as acceptor;protein kinase activity;protein serine/threonine kinase activity;protein serine/threonine/tyrosine kinase activity;protein tyrosine kinase act…	cell part;cytoplasmic part;cytoskeletal part;cytosol;intracellular;intracellular membrane-bounded organelle;intracellular non-membrane-bounded organelle;intracellular organelle;intracellular organelle part;intracellular part;membrane-bounded organelle;non-membrane-bounded organelle;nucleus;organelle;organelle part;spindle	PB1;Pkinase	20	20	65.2	65.2	50.111	0	323.31	26949000000	2.88065	3.12609	2.62029	3.19263	4.38294	4.22904	3.37844	2.88201	3.84543	3.98947	3.74797	4.05	3.14415	3.3155	3.6757	3.7946	3.1858	3.30206	3.30014	3.23124	2.88076	2.51549	3.11363	2.98143	3.02772	2.94771	3.02584	3.00846	3.42042	3.57787	2.33161	3.15097	3.87275	4.15454
P52564;P52564-2;K7EIW3;A0A0A0MRF7;K7ELM6	P52564;P52564-2	Dual specificity mitogen-activated protein kinase kinase 6	MAP2K6	activation of immune response;activation of innate immune response;activation of MAPK activity;apoptosis;biological regulation;biosynthetic process;cardiac muscle contraction;cell cycle arrest;cell cycle process;cell death;cell differentiation;cellular biosynthetic process;cellular developmental process;cellular macromolecule biosynthetic process;cellular macromolecule metabolic process;cellular …	adenyl nucleotide binding;adenyl ribonucleotide binding;ATP binding;binding;catalytic activity;enzyme binding;kinase activity;kinase binding;MAP kinase kinase activity;nucleotide binding;phosphotransferase activity, alcohol group as acceptor;protein binding;protein kinase activity;protein kinase binding;protein serine/threonine kinase activity;protein serine/threonine/tyrosine kinase activity;pro…	cell part;cytoplasm;cytoplasmic part;cytoskeleton;cytosol;intracellular non-membrane-bounded organelle;intracellular organelle;intracellular organelle part;intracellular part;non-membrane-bounded organelle;nuclear part;nucleoplasm;organelle;organelle part	Pkinase	29	25	86.5	74.3	37.492	0	323.31	22563000000	2.86004	3.14051	2.27035	2.87331	4.08043	4.55075	2.40605	2.81636	3.83329	4.0522	3.94629	4.21719	2.64364	2.77266	2.96479	2.67572	2.91004	2.63294	2.62309	2.64252	2.51447	1.96626	2.79844	2.68785	3.01405	2.7868	2.39258	2.47434	3.11854	2.8914	2.54179	2.53885	4.12948	4.17842
Q13233	Q13233	Mitogen-activated protein kinase kinase kinase 1	MAP3K1	activation of immune response;activation of innate immune response;activation of MAPKK activity;activation of protein kinase activity;anatomical structure development;anatomical structure morphogenesis;apoptotic mitochondrial changes;biological regulation;cell morphogenesis;cell morphogenesis involved in differentiation;cell surface receptor linked signaling pathway;cellular component morphogenes…	adenyl nucleotide binding;adenyl ribonucleotide binding;ATP binding;binding;catalytic activity;cation binding;enzyme binding;ion binding;JUN kinase kinase activity;kinase activity;kinase binding;MAP kinase kinase activity;MAP kinase kinase kinase activity;metal ion binding;molecular transducer activity;nucleotide binding;phosphotransferase activity, alcohol group as acceptor;protein binding;prote…	cell part;cytoplasm;cytoplasmic part;cytosol;intracellular part	Pkinase	35	35	37.4	37.4	164.47	0	323.31	10354000000	-0.770378	-1.36309	-0.109615	1.13306	2.60238	2.70422	2.82128	2.40802	2.61947	2.9064	2.65959	3.15505	1.56502	2.06293	2.713	2.6357	2.69835	2.38976	2.36194	2.52001	1.63648	1.17168	2.12676	2.29413	2.50967	2.31057	1.64945	1.86676	3.13144	2.67996	2.34079	2.01171	1.90088	2.34726
Q16584;Q16584-2;E9PID4;E9PLB1;E9PRQ2;H0YCF5	Q16584	Mitogen-activated protein kinase kinase kinase 11	MAP3K11	activation of JUN kinase activity;activation of MAPK activity;biological regulation;cell death;cell proliferation;cellular macromolecule metabolic process;cellular metabolic process;cellular process;cellular protein metabolic process;cellular response to stimulus;cellular response to stress;death;intracellular protein kinase cascade;intracellular signal transduction;JNK cascade;macromolecule meta…	adenyl nucleotide binding;adenyl ribonucleotide binding;ATP binding;binding;catalytic activity;enzyme binding;identical protein binding;JUN kinase kinase kinase activity;kinase activity;kinase binding;MAP kinase kinase kinase activity;mitogen-activated protein kinase kinase kinase binding;molecular transducer activity;nucleotide binding;phosphotransferase activity, alcohol group as acceptor;prote…	cell part;centrosome;cytoplasm;cytoplasmic part;cytoskeletal part;intracellular non-membrane-bounded organelle;intracellular organelle;intracellular organelle part;intracellular part;macromolecular complex;membrane;microtubule;microtubule organizing center;non-membrane-bounded organelle;organelle;organelle part;protein complex	Pkinase_Tyr;SH3_9	27	26	45.3	44.4	92.687	0	323.31	8907900000	0.974203	1.07519	0.423801	0.702883	2.68789	2.79197	2.70439	1.93481	2.28712	2.77062	2.15875	2.70975	1.77173	2.55674	2.27597	2.04678	2.40739	2.08883	2.8784	2.50074	1.87374	1.60449	1.98053	1.73581	2.17511	2.35513	1.86158	2.02272	2.9287	2.2989	1.9062	2.21076	2.06474	2.58095
Q12852;Q12852-2	Q12852;Q12852-2	Mitogen-activated protein kinase kinase kinase 12	MAP3K12	biological regulation;cellular component organization;cellular component organization at cellular level;cellular component organization or biogenesis;cellular component organization or biogenesis at cellular level;cellular macromolecule metabolic process;cellular metabolic process;cellular process;cellular protein metabolic process;cellular response to stimulus;cellular response to stress;chromat…	adenyl nucleotide binding;adenyl ribonucleotide binding;ATP binding;binding;catalytic activity;enzyme binding;identical protein binding;kinase activity;kinase binding;MAP kinase kinase kinase activity;molecular transducer activity;nucleotide binding;phosphotransferase activity, alcohol group as acceptor;protein binding;protein dimerization activity;protein homodimerization activity;protein kinase…	axon;cell part;cell projection;cell projection part;cytoplasm;cytoplasmic part;cytosol;growth cone;intracellular part;membrane;neuron projection;plasma membrane;site of polarized growth	Pkinase_Tyr	2	1	4.9	1.9	93.218	0.0013298	6.7163	62524000	NaN	NaN	NaN	NaN	-2.6056	-2.95966	NaN	NaN	-2.80372	-2.57625	NaN	-3.11417	NaN	NaN	NaN	NaN	NaN	NaN	NaN	NaN	NaN	NaN	NaN	NaN	NaN	NaN	NaN	NaN	NaN	NaN	NaN	NaN	NaN	NaN
Q9Y2U5;F8W6K3;J3QS19	Q9Y2U5	Mitogen-activated protein kinase kinase kinase 2	MAP3K2	activation of JUN kinase activity;activation of MAPK activity;biological regulation;cellular macromolecule metabolic process;cellular metabolic process;cellular process;cellular protein metabolic process;cellular response to abiotic stimulus;cellular response to external stimulus;cellular response to mechanical stimulus;cellular response to stimulus;macromolecule metabolic process;macromolecule m…	adenyl nucleotide binding;adenyl ribonucleotide binding;ATP binding;binding;catalytic activity;cation binding;enzyme binding;ion binding;kinase activity;kinase binding;MAP kinase kinase activity;MAP kinase kinase kinase activity;metal ion binding;molecular transducer activity;nucleotide binding;phosphotransferase activity, alcohol group as acceptor;protein binding;protein kinase activity;protein …	cell part;cytoplasm;cytoplasmic part;cytosol;intracellular organelle part;intracellular part;nuclear part;nucleoplasm;organelle part	PB1;Pkinase	45	38	73.2	68.5	69.74	0	323.31	73272000000	3.96935	4.1049	3.1524	4.04915	5.52422	5.71245	5.08333	5.23027	5.66627	5.88385	5.39984	5.46763	5.07104	5.58619	5.41777	5.45365	5.00726	5.10459	5.32725	5.40183	4.69905	4.25915	5.10967	5.22774	5.21176	5.35202	4.98301	5.02865	4.97051	5.50299	5.22887	5.20579	5.49654	5.5575
J3KRN4;J3QRB6;Q99759;Q99759-2;J3KTC4	J3KRN4;J3QRB6;Q99759;Q99759-2	Mitogen-activated protein kinase kinase kinase 3	MAP3K3	activation of MAPK activity;activation of MAPKK activity;activation of protein kinase activity;anatomical structure development;biological regulation;blood vessel development;cellular macromolecule metabolic process;cellular metabolic process;cellular process;cellular protein metabolic process;cellular response to stimulus;developmental process;intracellular protein kinase cascade;intracellular s…	adenyl nucleotide binding;adenyl ribonucleotide binding;ATP binding;binding;catalytic activity;cation binding;ion binding;kinase activity;MAP kinase kinase activity;MAP kinase kinase kinase activity;metal ion binding;molecular transducer activity;nucleotide binding;phosphotransferase activity, alcohol group as acceptor;protein kinase activity;protein serine/threonine kinase activity;protein serin…	cell part;cytoplasmic part;cytosol;intracellular;intracellular part	PB1;Pkinase	29	22	53.1	46.9	70.467	0	253.97	9833000000	1.68579	0.980843	0.446619	1.19619	1.87196	2.19948	2.68168	2.1773	2.00526	2.03604	1.68535	1.93754	3.23603	2.61769	3.23858	2.98433	2.31776	2.09869	2.68373	2.75829	2.15946	1.39306	2.48071	2.04107	2.62384	2.74342	2.59331	2.38296	2.94448	2.34579	1.95215	2.34875	1.97908	2.33333
F5H4R1;J3KNB8;F5H538;Q9Y6R4-2;Q9Y6R4;F5H1X6	F5H4R1;J3KNB8;F5H538;Q9Y6R4-2;Q9Y6R4;F5H1X6	Mitogen-activated protein kinase kinase kinase 4	MAP3K4	activation of MAPK activity;activation of MAPKK activity;activation of protein kinase activity;anatomical structure development;biological regulation;cell differentiation;cellular developmental process;cellular macromolecule metabolic process;cellular metabolic process;cellular process;cellular protein metabolic process;cellular response to stimulus;chorionic trophoblast cell differentiation;deve…	adenyl nucleotide binding;adenyl ribonucleotide binding;ATP binding;binding;catalytic activity;cation binding;ion binding;kinase activity;MAP kinase kinase activity;MAP kinase kinase kinase activity;metal ion binding;molecular transducer activity;nucleotide binding;phosphotransferase activity, alcohol group as acceptor;protein kinase activity;protein serine/threonine kinase activity;protein serin…	cell part;cytoplasm;cytoplasmic part;intracellular part;perinuclear region of cytoplasm	Pkinase	2	2	1.9	1.9	163.01	0.0013263	6.5628	8330600	NaN	NaN	NaN	NaN	NaN	NaN	NaN	NaN	-5.72517	-5.23594	NaN	-4.88966	NaN	NaN	NaN	NaN	NaN	NaN	NaN	NaN	NaN	NaN	NaN	NaN	NaN	NaN	NaN	NaN	NaN	NaN	NaN	NaN	NaN	NaN
J3KPI6;P80192;P80192-4;G3V4P9;A0A087WW79;G3V347;M0R0A7;M0R1J8	J3KPI6;P80192;P80192-4;G3V4P9;A0A087WW79	Mitogen-activated protein kinase kinase kinase 9	MAP3K9	activation of JNKK activity;activation of JUN kinase activity;activation of MAPK activity;activation of MAPKK activity;activation of protein kinase activity;apoptosis;biological regulation;biosynthetic process;cell death;cellular biosynthetic process;cellular macromolecule biosynthetic process;cellular macromolecule metabolic process;cellular metabolic process;cellular nitrogen compound metabolic…	adenyl nucleotide binding;adenyl ribonucleotide binding;ATP binding;binding;catalytic activity;identical protein binding;JUN kinase kinase kinase activity;kinase activity;MAP kinase kinase activity;MAP kinase kinase kinase activity;molecular transducer activity;nucleotide binding;phosphotransferase activity, alcohol group as acceptor;protein binding;protein dimerization activity;protein homodimer…		Pkinase;Pkinase_Tyr;SH3_9	18	15	25.7	23.1	119.38	0	96.18	1621700000	NaN	-2.07916	NaN	-3.00077	-0.82564	0.645037	-0.0284176	-0.522791	-1.58346	0.378199	-1.06773	0.0447464	-0.552616	1.19228	0.838219	1.6484	0.898909	-2.01612	0.631987	-0.288649	-0.663424	-0.555798	0.352577	-0.504654	0.227144	-0.242886	-0.753586	0.358833	2.2525	1.47377	0.318438	-1.10894	-1.42603	-0.545605
A0A0A6YYA7;Q12851-2;Q12851;C9JCU6;H7C208;F2Z2B3;F8WCP4	A0A0A6YYA7;Q12851-2;Q12851	Mitogen-activated protein kinase kinase kinase kinase 2	MAP4K2	activation of JUN kinase activity;activation of MAPK activity;activation of MAPKKK activity;activation of protein kinase activity;biological regulation;cellular macromolecule metabolic process;cellular metabolic process;cellular process;cellular protein metabolic process;cellular response to stimulus;cellular response to stress;defense response;immune response;immune system process;innate immune …	adenyl nucleotide binding;adenyl ribonucleotide binding;ATP binding;binding;catalytic activity;enzyme binding;kinase activity;kinase binding;MAP kinase kinase kinase kinase activity;mitogen-activated protein kinase kinase kinase binding;molecular transducer activity;nucleotide binding;phosphotransferase activity, alcohol group as acceptor;protein binding;protein kinase activity;protein kinase bin…	basolateral plasma membrane;cell part;cytoplasmic part;Golgi apparatus part;Golgi membrane;intracellular organelle part;intracellular part;membrane;membrane part;organelle membrane;organelle part;plasma membrane part	CNH;Pkinase	46	43	65.1	64	90.808	0	323.31	43607000000	3.06945	3.60453	2.97582	3.70634	4.54126	4.56421	4.66852	4.78095	4.59026	4.56898	4.76448	4.51773	4.02292	4.65551	4.85654	4.74716	4.7114	4.60873	4.9091	4.60598	4.18172	3.62503	4.71916	4.26593	4.53003	4.6264	4.29788	4.14953	5.05039	4.75596	4.29643	4.43764	4.58559	4.64525
Q8IVH8;Q8IVH8-2;F8WAZ1;V9GY95;H7C1A4;F8WBC3	Q8IVH8;Q8IVH8-2	Mitogen-activated protein kinase kinase kinase kinase 3	MAP4K3	activation of MAPKKK activity;activation of protein kinase activity;biological regulation;cellular macromolecule metabolic process;cellular metabolic process;cellular process;cellular protein metabolic process;cellular response to stimulus;cellular response to stress;intracellular protein kinase cascade;intracellular signal transduction;JNK cascade;macromolecule metabolic process;macromolecule mo…	adenyl nucleotide binding;adenyl ribonucleotide binding;ATP binding;binding;catalytic activity;kinase activity;MAP kinase kinase kinase kinase activity;molecular transducer activity;nucleotide binding;phosphotransferase activity, alcohol group as acceptor;protein kinase activity;protein serine/threonine kinase activity;purine nucleotide binding;purine ribonucleoside triphosphate binding;purine ri…	cell part;cytoplasm;intracellular part	CNH;Pkinase	37	2	53.2	5.5	101.31	0	254.37	17866000000	2.70786	3.21003	1.13757	3.14873	3.01882	3.28658	3.06727	4.18063	2.9112	2.6031	2.69622	3.07814	3.99636	4.65078	3.65917	4.41563	4.09899	4.15078	4.07994	3.02891	2.33145	2.10485	3.8369	4.2393	3.95874	3.19957	3.7062	4.24366	4.06025	3.40225	4.01851	2.90841	2.54835	2.69958
E7EN19;E7ESS2;A0A0D9SEY1;O95819-2;O95819;O95819-3;E7ENQ1;G3XAA2;H7C360;G5E948;O95819-4;O95819-5;E7EX83;A0A0D9SG62;C9J840;H7C0P6;E7ETN6	E7EN19;E7ESS2;A0A0D9SEY1;O95819-2;O95819;O95819-3;E7ENQ1;G3XAA2;H7C360;G5E948;O95819-4;O95819-5;E7EX83;A0A0D9SG62;C9J840	Mitogen-activated protein kinase kinase kinase kinase 4	MAP4K4	activation of protein kinase activity;anatomical structure morphogenesis;biological regulation;cell part morphogenesis;cell projection morphogenesis;cell projection organization;cellular component morphogenesis;cellular component organization;cellular component organization at cellular level;cellular component organization or biogenesis;cellular component organization or biogenesis at cellular le…	adenyl nucleotide binding;adenyl ribonucleotide binding;ATP binding;binding;catalytic activity;creatine kinase activity;kinase activity;nucleotide binding;phosphotransferase activity, alcohol group as acceptor;phosphotransferase activity, nitrogenous group as acceptor;protein kinase activity;protein serine/threonine kinase activity;purine nucleotide binding;purine ribonucleoside triphosphate bind…	cell part;cytoplasm;intracellular part	CNH;Pkinase	30	12	27.4	14.9	144.92	0	72.361	1955400000	0.583055	NaN	0.254768	-3.51397	-0.429895	-1.0461	0.244589	1.20975	2.28835	-2.92296	1.81065	-3.1733	0.711189	-1.04488	0.799803	-0.107534	1.38484	0.925144	1.80876	0.997568	0.766348	-2.17113	0.966051	1.08855	1.44662	1.24116	0.823627	-1.77996	1.52792	1.26224	1.12615	0.749146	-1.55841	-1.72927
A0A0A0MQR1	A0A0A0MQR1	Mitogen-activated protein kinase kinase kinase kinase 5	MAP4K5		adenyl nucleotide binding;adenyl ribonucleotide binding;ATP binding;binding;catalytic activity;kinase activity;nucleotide binding;phosphotransferase activity, alcohol group as acceptor;protein kinase activity;protein serine/threonine kinase activity;purine nucleotide binding;purine ribonucleoside triphosphate binding;purine ribonucleotide binding;ribonucleotide binding;transferase activity;transf…		CNH;Pkinase	54	2	74.9	4.5	95.023	0	323.31	56340000000	3.43357	4.02205	3.33036	4.20685	5.35286	5.33389	4.72966	4.82608	4.98237	5.13727	4.93275	5.11088	4.70626	4.83307	5.05949	4.94265	4.69251	4.65689	4.72815	4.89176	4.27254	4.16242	4.64037	4.74469	4.73738	5.02065	4.29399	4.62152	4.8862	4.93914	4.43815	4.69067	4.54169	5.13406
P28482;P28482-2	P28482;P28482-2	Mitogen-activated protein kinase 1	MAPK1	activation of immune response;activation of innate immune response;activation of MAPK activity;activation of MAPKK activity;activation of protein kinase activity;anatomical structure development;anatomical structure morphogenesis;antigen receptor-mediated signaling pathway;apoptosis;axon guidance;B cell receptor signaling pathway;biological regulation;biosynthetic process;blood coagulation;blood …	adenyl nucleotide binding;adenyl ribonucleotide binding;ATP binding;binding;catalytic activity;DNA binding;enzyme binding;kinase activity;MAP kinase activity;molecular transducer activity;nucleic acid binding;nucleotide binding;phosphatase binding;phosphotransferase activity, alcohol group as acceptor;protein binding;protein kinase activity;protein serine/threonine kinase activity;purine nucleoti…	adherens junction;anchoring junction;axon;caveola;cell junction;cell part;cell projection;cell projection cytoplasm;cell projection part;cell-substrate adherens junction;cell-substrate junction;cytoplasm;cytoplasmic part;cytoskeletal part;cytoskeleton;cytosol;dendrite cytoplasm;early endosome;endosome;extracellular membrane-bounded organelle;extracellular organelle;extracellular region part;extra…	Pkinase	58	47	96.9	85.6	41.389	0	323.31	1460200000000	8.68504	8.73078	7.68224	8.16395	9.50713	9.66389	8.7706	8.71901	9.2878	9.55378	9.79774	9.89929	8.63558	8.78873	9.25724	9.05246	9.1093	9.1524	8.53748	8.31672	8.55132	8.24048	9.38197	9.27795	8.3445	8.51979	8.90315	9.01527	9.72643	9.38563	8.58274	8.87397	8.43829	8.51778
Q15759	Q15759	Mitogen-activated protein kinase 11	MAPK11	activation of immune response;activation of innate immune response;activation of MAPK activity;biological regulation;biosynthetic process;cell differentiation;cell surface receptor linked signaling pathway;cellular biosynthetic process;cellular component organization;cellular component organization at cellular level;cellular component organization or biogenesis;cellular component organization or …	adenyl nucleotide binding;adenyl ribonucleotide binding;ATP binding;binding;catalytic activity;kinase activity;MAP kinase activity;molecular transducer activity;nucleotide binding;phosphotransferase activity, alcohol group as acceptor;protein kinase activity;protein serine/threonine kinase activity;purine nucleotide binding;purine ribonucleoside triphosphate binding;purine ribonucleotide binding;…	cell part;cytoplasmic part;cytosol;intracellular organelle part;intracellular part;nuclear part;nucleoplasm;organelle part	Pkinase	4	3	13.2	11.3	41.357	0	33.775	198200000	NaN	NaN	NaN	-2.42412	-3.58292	-3.15628	-1.85787	-1.76758	-3.92379	-3.49692	-3.52869	-3.58296	NaN	-1.97372	-1.67056	-1.67736	NaN	-2.23225	NaN	NaN	NaN	-2.85995	NaN	NaN	-2.08702	-2.26932	-3.6899	-1.66464	-1.30237	-3.26045	NaN	NaN	NaN	NaN
P53778-2;P53778;B5MDL5;A8MY48	P53778-2;P53778;B5MDL5	Mitogen-activated protein kinase 12	MAPK12	anatomical structure development;biological regulation;biosynthetic process;cell cycle arrest;cell cycle process;cell differentiation;cell surface receptor linked signaling pathway;cellular biosynthetic process;cellular component organization;cellular component organization at cellular level;cellular component organization or biogenesis;cellular component organization or biogenesis at cellular le…	adenyl nucleotide binding;adenyl ribonucleotide binding;ATP binding;binding;catalytic activity;cation binding;ion binding;kinase activity;magnesium ion binding;MAP kinase activity;metal ion binding;molecular transducer activity;nucleotide binding;phosphotransferase activity, alcohol group as acceptor;protein kinase activity;protein serine/threonine kinase activity;purine nucleotide binding;purine…	cell part;cytoplasm;cytoplasmic part;cytosol;intracellular membrane-bounded organelle;intracellular organelle;intracellular organelle part;intracellular part;membrane-bounded organelle;mitochondrion;nuclear part;nucleoplasm;organelle;organelle part	Pkinase	6	5	30	25.5	40.807	0	109.29	258590000	NaN	NaN	NaN	NaN	-3.28267	-1.98659	NaN	NaN	-4.14011	-3.09628	-1.29343	-2.39088	-4.04779	NaN	-3.68839	NaN	-1.56289	NaN	-3.12512	-1.47337	-3.76262	NaN	NaN	NaN	-4.13739	NaN	NaN	-2.29754	NaN	NaN	-3.03282	-1.81002	-3.83936	-2.68749
O15264;O15264-2;Q5R3E6	O15264;O15264-2	Mitogen-activated protein kinase 13	MAPK13	biological regulation;biosynthetic process;cell cycle;cell surface receptor linked signaling pathway;cellular biosynthetic process;cellular macromolecule biosynthetic process;cellular macromolecule metabolic process;cellular metabolic process;cellular nitrogen compound metabolic process;cellular process;cellular protein metabolic process;cellular response to chemical stimulus;cellular response to…	adenyl nucleotide binding;adenyl ribonucleotide binding;ATP binding;binding;catalytic activity;kinase activity;MAP kinase activity;molecular transducer activity;nucleotide binding;phosphotransferase activity, alcohol group as acceptor;protein kinase activity;protein serine/threonine kinase activity;purine nucleotide binding;purine ribonucleoside triphosphate binding;purine ribonucleotide binding;…	cell part;cytoplasmic part;cytosol;intracellular part	Pkinase	20	19	67.9	67.9	42.089	0	189.47	4897500000	-0.634718	-1.97289	NaN	NaN	1.85278	1.62313	1.12639	1.40627	1.3363	1.95989	1.75351	1.36709	0.913143	1.33989	1.74378	1.09907	0.913729	1.38201	-0.135895	0.117252	-0.261652	-0.285471	1.39818	1.44464	0.905582	1.11025	-0.3776	1.56414	0.945965	2.26365	1.18106	1.77811	0.381668	0.964415
Q16539;Q16539-3;B4E0K5;Q16539-5;Q16539-4;B5TY33;E7EX54;H7C4E2;F8WDP4	Q16539;Q16539-3;B4E0K5;Q16539-5;Q16539-4;B5TY33	Mitogen-activated protein kinase 14	MAPK14	3'-UTR-mediated mRNA stabilization;activation of immune response;activation of innate immune response;activation of MAPK activity;aging;alcohol metabolic process;anatomical structure development;anatomical structure formation involved in morphogenesis;anatomical structure morphogenesis;angiogenesis;apoptosis;biological adhesion;biological regulation;biosynthetic process;blood coagulation;carbohyd…	adenyl nucleotide binding;adenyl ribonucleotide binding;ATP binding;binding;catalytic activity;kinase activity;MAP kinase activity;MAP kinase kinase activity;molecular transducer activity;NFAT protein binding;nucleotide binding;phosphotransferase activity, alcohol group as acceptor;protein binding;protein kinase activity;protein serine/threonine kinase activity;protein serine/threonine/tyrosine k…	cell part;cytoplasm;cytoplasmic part;cytoskeletal part;cytosol;extracellular membrane-bounded organelle;extracellular organelle;extracellular region part;extracellular vesicular exosome;intracellular membrane-bounded organelle;intracellular organelle;intracellular organelle part;intracellular part;membrane-bounded organelle;membrane-bounded vesicle;mitochondrion;nuclear part;nucleoplasm;nucleus;o…	Pkinase	35	5	86.9	11.9	41.293	0	323.31	275420000000	5.86708	6.38723	5.5739	6.41072	7.43383	7.45983	6.82354	7.04418	6.80877	7.02097	7.14341	7.17704	6.9681	7.32399	7.59267	7.54199	7.12236	6.71982	7.40902	7.23497	3.55314	3.03869	7.03513	7.03442	7.24432	7.39579	7.02909	7.2165	7.63101	7.40456	7.22237	7.21965	6.93861	7.23329
Q8TD08;Q8TD08-2;Q8TD08-3	Q8TD08;Q8TD08-2;Q8TD08-3	Mitogen-activated protein kinase 15	MAPK15	biological regulation;cellular macromolecule metabolic process;cellular metabolic process;cellular process;cellular protein metabolic process;cellular response to stimulus;intracellular protein kinase cascade;intracellular signal transduction;macromolecule metabolic process;macromolecule modification;MAPKKK cascade;metabolic process;negative regulation of biological process;negative regulation of…	adenyl nucleotide binding;adenyl ribonucleotide binding;ATP binding;binding;catalytic activity;kinase activity;MAP kinase activity;molecular transducer activity;nucleotide binding;phosphotransferase activity, alcohol group as acceptor;protein binding;protein domain specific binding;protein kinase activity;protein serine/threonine kinase activity;purine nucleotide binding;purine ribonucleoside tri…	cell part;extracellular region;intracellular;intracellular membrane-bounded organelle;intracellular organelle;intracellular part;membrane-bounded organelle;nucleus;organelle	Pkinase	4	4	5.9	5.9	59.831	0.00067295	7.1461	54106000000	3.33128	3.60185	2.68055	3.28609	4.81928	4.84513	3.62334	4.3813	4.57191	4.85162	4.84899	5.22475	3.75701	3.95943	4.23864	4.37093	4.2961	4.69431	3.11081	3.57301	4.19413	3.82596	4.44401	4.59978	3.15502	3.64087	4.52296	4.39429	5.00698	5.4117	3.90823	4.31618	3.33138	3.34577
P27361;E9PQW4;P27361-2;P27361-3;E9PJF0;E9PBK7;B3KR49;H0YEX6;E9PRH7;H0YDH9	P27361;E9PQW4;P27361-2;P27361-3;E9PJF0;E9PBK7;B3KR49	Mitogen-activated protein kinase 3;Mitogen-activated protein kinase	MAPK3	activation of immune response;activation of innate immune response;activation of MAPK activity;activation of MAPKK activity;activation of protein kinase activity;anatomical structure development;anatomical structure morphogenesis;apoptosis;axon guidance;biological regulation;biosynthetic process;blood coagulation;BMP signaling pathway;cartilage development;caveolin-mediated endocytosis;cell activ…	adenyl nucleotide binding;adenyl ribonucleotide binding;ATP binding;binding;catalytic activity;enzyme binding;kinase activity;MAP kinase activity;molecular transducer activity;nucleotide binding;phosphatase binding;phosphotransferase activity, alcohol group as acceptor;protein binding;protein kinase activity;protein serine/threonine kinase activity;purine nucleotide binding;purine ribonucleoside …	adherens junction;anchoring junction;caveola;cell junction;cell part;cell projection;cell-substrate adherens junction;cell-substrate junction;cytoplasmic part;cytoskeleton;cytosol;early endosome;endosome;envelope;extracellular membrane-bounded organelle;extracellular organelle;extracellular region part;extracellular vesicular exosome;focal adhesion;Golgi apparatus;intracellular membrane-bounded o…	Pkinase	37	26	87.3	69.9	43.135	0	323.31	76881000000	4.09234	4.30941	2.37317	3.08766	5.08171	5.24834	3.53073	3.8137	4.63631	4.75448	5.60595	5.3522	3.09507	4.28783	3.95756	4.51592	4.41474	4.64084	3.74443	2.97798	3.51316	3.40062	4.92909	4.82145	3.17608	2.97082	3.54966	4.55952	4.82179	4.95713	3.62218	4.03393	3.60374	3.37125
Q16659;K7ELV1;P31152;K7EN18	Q16659	Mitogen-activated protein kinase 6	MAPK6	biological regulation;cell cycle;cellular macromolecule metabolic process;cellular metabolic process;cellular process;cellular protein metabolic process;cellular response to stimulus;intracellular protein kinase cascade;intracellular signal transduction;macromolecule metabolic process;macromolecule modification;MAPKKK cascade;metabolic process;phosphate-containing compound metabolic process;phosp…	adenyl nucleotide binding;adenyl ribonucleotide binding;ATP binding;binding;catalytic activity;enzyme binding;identical protein binding;kinase activity;kinase binding;MAP kinase activity;molecular transducer activity;nucleotide binding;phosphotransferase activity, alcohol group as acceptor;protein binding;protein dimerization activity;protein homodimerization activity;protein kinase activity;prot…	cell part;cytoplasm;intracellular membrane-bounded organelle;intracellular organelle;intracellular part;membrane-bounded organelle;nucleus;organelle	Pkinase	22	19	35	34.5	82.68	0	323.31	7267700000	0.703747	1.07537	-0.921169	0.821779	2.30782	2.20923	1.68602	1.44426	1.96909	1.85125	2.3174	1.90827	1.5727	2.09458	2.11703	1.99513	1.63921	1.52696	1.89844	1.66573	1.23447	0.920689	1.72202	1.34226	1.79889	1.78689	1.45806	1.53892	2.10756	1.72997	1.79357	1.58366	1.87232	2.11572
P45983-3;P45983-4;P45983-5;A6NF29;C9J762;D6R9C1;D6RBH2	P45983-3;P45983-4;P45983-5	Mitogen-activated protein kinase 8	MAPK8	activation of immune response;activation of innate immune response;apoptosis;biological regulation;cell death;cell surface receptor linked signaling pathway;cellular macromolecule metabolic process;cellular metabolic process;cellular process;cellular protein metabolic process;cellular response to abiotic stimulus;cellular response to biotic stimulus;cellular response to chemical stimulus;cellular…	adenyl nucleotide binding;adenyl ribonucleotide binding;ATP binding;binding;catalytic activity;enzyme binding;enzyme regulator activity;histone deacetylase binding;histone deacetylase regulator activity;JUN kinase activity;kinase activity;MAP kinase activity;molecular transducer activity;nucleotide binding;phosphotransferase activity, alcohol group as acceptor;protein binding;protein kinase activ…	cell part;cytoplasmic part;cytosol;intracellular membrane-bounded organelle;intracellular organelle;intracellular organelle part;intracellular part;membrane-bounded organelle;mitochondrion;nuclear part;nucleoplasm;nucleus;organelle;organelle part	Pkinase	50	6	96.6	15.9	44.021	0	323.31	526930000000	7.15554	7.25664	5.88243	6.43371	7.67379	7.71758	7.85592	8.04117	8.17473	8.16023	8.37441	8.17803	8.10307	8.20375	8.34858	8.10872	7.83786	7.76501	8.11517	8.19161	7.63394	7.43426	8.30106	8.40668	8.1945	8.40438	8.05712	8.12845	8.43009	8.35066	8.17271	8.41412	8.12816	8.22087
P45984-2;P45984;J3KNK1;P45984-5;D7R525;E5RJ57;D7R528	P45984-2;P45984;J3KNK1	Mitogen-activated protein kinase 9	MAPK9	activation of immune response;activation of innate immune response;anatomical structure development;apoptotic mitochondrial changes;biological regulation;cell projection organization;cellular component organization;cellular component organization at cellular level;cellular component organization or biogenesis;cellular component organization or biogenesis at cellular level;cellular macromolecule m…	adenyl nucleotide binding;adenyl ribonucleotide binding;apoptotic protease activator activity;ATP binding;binding;caspase activator activity;caspase regulator activity;catalytic activity;enzyme activator activity;enzyme regulator activity;JUN kinase activity;kinase activity;MAP kinase activity;molecular transducer activity;nucleotide binding;peptidase activator activity;peptidase regulator activi…	cell part;cytoplasmic part;cytosol;intracellular membrane-bounded organelle;intracellular organelle;intracellular organelle part;intracellular part;membrane-bounded organelle;mitochondrion;nuclear part;nucleoplasm;organelle;organelle part	Pkinase	61	7	99.7	16.2	44.05	0	323.31	919510000000	8.22316	8.42265	7.52334	8.12096	8.44869	8.6233	8.87456	8.86515	8.59075	8.80731	8.6947	8.63393	8.82027	9.11395	9.36821	9.32132	9.11663	8.73353	9.23363	8.79367	8.83986	8.10467	9.26698	9.15395	9.13137	9.45844	8.97957	8.99486	9.87661	9.32715	8.99278	9.3346	8.50202	8.77519
Q8IW41-2;F8VRP2	Q8IW41-2	MAP kinase-activated protein kinase 5	MAPKAPK5	activation of MAPK activity;aging;biological regulation;cell aging;cell surface receptor linked signaling pathway;cellular macromolecule metabolic process;cellular metabolic process;cellular process;cellular protein metabolic process;cellular response to stimulus;cellular response to stress;cellular senescence;developmental process;intracellular protein kinase cascade;intracellular signal transdu…	adenyl nucleotide binding;adenyl ribonucleotide binding;ATP binding;binding;calcium-dependent protein kinase activity;calcium-dependent protein serine/threonine kinase activity;calmodulin binding;calmodulin-dependent protein kinase activity;catalytic activity;enzyme binding;kinase activity;kinase binding;MAP kinase kinase activity;mitogen-activated protein kinase binding;molecular transducer acti…	cell part;cytoplasm;intracellular organelle part;intracellular part;nuclear part;nucleoplasm;organelle part	Pkinase	28	2	68.4	6.4	54.035	0	323.31	54320000000	3.06133	3.33643	2.86307	3.47743	5.03835	5.30933	5.04128	4.56806	4.73918	5.13867	4.80223	5.04246	4.33441	4.84583	4.84551	4.92911	4.59672	4.68349	5.04197	4.52008	4.38159	4.01147	4.51992	4.53053	4.76674	4.85871	4.07372	4.22096	4.57293	4.71358	4.74914	4.61193	4.97666	5.26675
A0A087X0I6;B4DIB3;Q9P0L2;Q9P0L2-3;Q9P0L2-2	A0A087X0I6;B4DIB3;Q9P0L2;Q9P0L2-3;Q9P0L2-2	Serine/threonine-protein kinase MARK1	MARK1	biological regulation;cell migration;cell motility;cell surface receptor linked signaling pathway;cellular component movement;cellular component organization;cellular component organization at cellular level;cellular component organization or biogenesis;cellular component organization or biogenesis at cellular level;cellular macromolecule metabolic process;cellular metabolic process;cellular proc…	adenyl nucleotide binding;adenyl ribonucleotide binding;ATP binding;binding;catalytic activity;cation binding;ion binding;kinase activity;lipid binding;magnesium ion binding;metal ion binding;nucleotide binding;phosphatidic acid binding;phosphatidylinositol binding;phosphatidylinositol-4,5-bisphosphate binding;phosphatidylserine binding;phospholipid binding;phosphotransferase activity, alcohol gr…	cell part;cytoplasm;cytoskeleton;intracellular non-membrane-bounded organelle;intracellular organelle;intracellular part;membrane;microtubule cytoskeleton;non-membrane-bounded organelle;organelle;plasma membrane	KA1;Pkinase	26	14	46.6	28.6	89.089	0	47.737	3825000000	-1.30112	-4.86431	NaN	NaN	0.675522	1.51205	2.29211	2.38944	-0.848288	1.62914	0.723484	-0.837347	1.28685	1.91464	1.60567	1.08794	1.94734	1.72159	1.92581	2.26448	0.54948	0.22809	1.9212	2.1023	2.01958	2.04056	1.18013	1.50916	1.54502	1.85063	2.06797	2.30607	-0.367918	0.252173
E9PC69;Q7KZI7-16;Q7KZI7-15;Q7KZI7-14;E7ETY4;Q7KZI7-13;F5H4F6;F5H6N2	E9PC69;Q7KZI7-16;Q7KZI7-15;Q7KZI7-14;E7ETY4;Q7KZI7-13	Serine/threonine-protein kinase MARK2	MARK2	activation of protein kinase activity;autophagy;biological regulation;catabolic process;cell migration;cell motility;cell surface receptor linked signaling pathway;cellular catabolic process;cellular component movement;cellular localization;cellular macromolecule metabolic process;cellular metabolic process;cellular process;cellular protein metabolic process;cellular response to stimulus;establis…	adenyl nucleotide binding;adenyl ribonucleotide binding;ATP binding;binding;catalytic activity;cation binding;enzyme activator activity;enzyme regulator activity;ion binding;kinase activator activity;kinase activity;kinase regulator activity;lipid binding;magnesium ion binding;metal ion binding;nucleotide binding;phosphotransferase activity, alcohol group as acceptor;protein kinase activator acti…	actin filament;basal cortex;cell cortex part;cell part;cytoplasmic part;cytoskeletal part;intracellular membrane-bounded organelle;intracellular organelle;intracellular organelle part;intracellular part;lateral plasma membrane;macromolecular complex;membrane;membrane part;membrane-bounded organelle;mitochondrion;nucleus;organelle;organelle part;plasma membrane;plasma membrane part;protein complex	KA1;Pkinase	44	2	65.7	2.3	86.69	0	323.31	89754000000	4.01317	3.94577	2.01011	3.05902	5.47352	5.53192	5.97889	6.0752	5.49423	5.72363	5.53411	5.35187	5.46116	5.55161	5.75625	5.86072	5.75156	5.64504	5.84403	5.68786	5.11374	4.36495	5.7139	5.68801	5.94696	6.20824	5.4655	5.48705	5.85028	5.82921	5.76217	6.25037	4.05693	4.27892
A0A0A0MT23;P27448-3;P27448-4;P27448;A0A0A0MSZ1;J3KNR0;P27448-2;A0A0A0MQR8;P27448-6;P27448-7;A0A0A0MST9;P27448-8;H0YIY6;H0YKP9;A2SY06;H0YNV4;H0YKJ3	A0A0A0MT23;P27448-3;P27448-4;P27448;A0A0A0MSZ1;J3KNR0;P27448-2;A0A0A0MQR8;P27448-6;P27448-7;A0A0A0MST9;P27448-8;H0YIY6	MAP/microtubule affinity-regulating kinase 3	MARK3		adenyl nucleotide binding;adenyl ribonucleotide binding;ATP binding;binding;catalytic activity;kinase activity;nucleotide binding;phosphotransferase activity, alcohol group as acceptor;protein kinase activity;protein serine/threonine kinase activity;purine nucleotide binding;purine ribonucleoside triphosphate binding;purine ribonucleotide binding;ribonucleotide binding;transferase activity;transf…	cell part;extracellular membrane-bounded organelle;extracellular organelle;extracellular region part;extracellular vesicular exosome;membrane;membrane-bounded organelle;membrane-bounded vesicle;organelle;plasma membrane;vesicle	KA1;Pkinase	29	15	54.1	33.3	84.428	0	323.31	14220000000	0.546516	0.770101	-1.92323	-1.41735	2.35429	2.77823	3.85381	3.84168	1.9405	2.60522	2.74909	2.77272	2.92273	3.65938	3.36722	3.36827	2.83506	3.43446	3.23497	3.48674	2.79028	2.29836	3.07598	3.78154	3.52973	4.1589	3.54536	3.3933	3.81722	3.70157	3.08738	3.81485	0.831295	1.83474
Q96L34-2;Q96L34;K7EK17;K7EKG8	Q96L34-2;Q96L34;K7EK17;K7EKG8	MAP/microtubule affinity-regulating kinase 4	MARK4	anatomical structure development;biological regulation;cellular component organization;cellular component organization at cellular level;cellular component organization or biogenesis;cellular component organization or biogenesis at cellular level;cellular macromolecule metabolic process;cellular metabolic process;cellular process;cellular protein metabolic process;cytoskeleton organization;develo…	adenyl nucleotide binding;adenyl ribonucleotide binding;ATP binding;binding;catalytic activity;cytoskeletal protein binding;gamma-tubulin binding;kinase activity;microtubule binding;nucleotide binding;phosphotransferase activity, alcohol group as acceptor;protein binding;protein kinase activity;protein serine/threonine kinase activity;purine nucleotide binding;purine ribonucleoside triphosphate b…	cell part;cell projection;centrosome;cytoplasmic part;cytoskeletal part;cytoskeleton;cytosol;intracellular non-membrane-bounded organelle;intracellular organelle;intracellular organelle part;intracellular part;microtubule cytoskeleton;microtubule organizing center;neuron projection;non-membrane-bounded organelle;organelle;organelle part	KA1;Pkinase;UBA	3	1	6.2	3.3	75.32	0.0013115	6.2408	14532000	NaN	NaN	NaN	NaN	NaN	NaN	NaN	NaN	NaN	NaN	NaN	NaN	NaN	NaN	NaN	NaN	NaN	NaN	-3.95289	NaN	NaN	NaN	NaN	NaN	NaN	NaN	NaN	NaN	-3.38584	-4.18863	NaN	NaN	NaN	NaN
O60307	O60307	Microtubule-associated serine/threonine-protein kinase 3	MAST3		adenyl nucleotide binding;adenyl ribonucleotide binding;ATP binding;binding;catalytic activity;cation binding;ion binding;kinase activity;magnesium ion binding;metal ion binding;nucleotide binding;phosphotransferase activity, alcohol group as acceptor;protein kinase activity;protein serine/threonine kinase activity;purine nucleotide binding;purine ribonucleoside triphosphate binding;purine ribonu…		DUF1908;PDZ;Pkinase	6	5	8.6	7.9	143.14	0.0046003	3.1477	10270000000	1.06863	2.20623	1.99585	1.83733	2.23856	1.79936	0.0528259	1.11572	1.08709	1.27587	2.11303	0.45513	0.785778	0.497559	0.694822	2.14297	1.10654	0.816803	2.66595	2.11196	-2.80136	-0.402407	0.605722	-4.23741	0.727224	0.377291	2.59897	1.34641	1.29344	-3.08726	2.22635	1.44324	2.15513	1.9528
Q96GX5-2;Q96GX5-3;Q96GX5;A0A087WUU7	Q96GX5-2;Q96GX5-3;Q96GX5;A0A087WUU7	Serine/threonine-protein kinase greatwall	MASTL	biological regulation;cell cycle;cell cycle phase;cell cycle process;cell division;cellular component organization;cellular component organization at cellular level;cellular component organization or biogenesis;cellular component organization or biogenesis at cellular level;cellular process;cellular response to stimulus;cellular response to stress;G2/M transition of mitotic cell cycle;mitosis;mit…	adenyl nucleotide binding;adenyl ribonucleotide binding;ATP binding;binding;catalytic activity;enzyme binding;kinase activity;nucleotide binding;phosphatase binding;phosphotransferase activity, alcohol group as acceptor;protein binding;protein kinase activity;protein phosphatase 2A binding;protein phosphatase binding;protein serine/threonine kinase activity;purine nucleotide binding;purine ribonu…	cell division site part;cell part;centrosome;cleavage furrow;cytoplasm;cytoplasmic part;cytoskeletal part;intracellular membrane-bounded organelle;intracellular non-membrane-bounded organelle;intracellular organelle;intracellular organelle part;intracellular part;membrane-bounded organelle;microtubule organizing center;non-membrane-bounded organelle;nuclear part;nucleoplasm;nucleus;organelle;orga…	Pkinase	15	14	33.8	32.9	92.86	0	282.08	1334000000	-2.97012	-1.63211	NaN	-4.27521	0.643454	0.187359	-1.61114	NaN	-0.509706	0.443787	-0.0482712	0.0248146	NaN	NaN	-4.08227	NaN	NaN	NaN	-2.30966	NaN	NaN	-2.58028	NaN	NaN	-2.05225	NaN	NaN	NaN	NaN	NaN	NaN	NaN	0.0669079	-0.374651
Q14680-2;Q14680-8;Q14680;Q14680-7;Q14680-4;Q14680-6;Q14680-3;A0A0D9SGI4;A0A0D9SFF9;A0A0D9SFL8;A0A0D9SFB9	Q14680-2;Q14680-8;Q14680;Q14680-7;Q14680-4;Q14680-6;Q14680-3	Maternal embryonic leucine zipper kinase	MELK	anatomical structure development;apoptosis;biological regulation;cell cycle process;cell death;cell proliferation;cellular macromolecule metabolic process;cellular metabolic process;cellular process;cellular protein metabolic process;cellular response to stimulus;death;developmental process;G2/M transition of mitotic cell cycle;hemopoiesis;hemopoietic or lymphoid organ development;induction of ap…	adenyl nucleotide binding;adenyl ribonucleotide binding;ATP binding;binding;calcium ion binding;catalytic activity;cation binding;ion binding;kinase activity;lipid binding;metal ion binding;non-membrane spanning protein tyrosine kinase activity;nucleotide binding;phosphotransferase activity, alcohol group as acceptor;protein kinase activity;protein serine/threonine kinase activity;protein tyrosin…	cell cortex;cell part;cytoplasmic part;intracellular membrane-bounded organelle;intracellular organelle;intracellular part;membrane;membrane-bounded organelle;nucleus;organelle;plasma membrane	KA1;Pkinase	7	2	21	5	66.398	0	129.87	967580000	NaN	-3.06662	NaN	NaN	-1.28562	-0.860193	-0.571161	-0.964167	-0.964512	-0.443975	-0.642836	-1.07997	NaN	-0.185621	-1.6504	0.181375	-0.422655	-0.761663	-2.15291	-2.69157	-1.84789	-1.03969	-2.05006	-1.57113	-2.18288	-0.554073	-2.3818	-0.0276871	-1.07182	0.135002	-1.29496	-1.23943	-0.806362	-1.7856
Q12866;E9PHX8;A0A087WZQ5;H7C3L9	Q12866;E9PHX8;A0A087WZQ5	Tyrosine-protein kinase Mer	MERTK	anatomical structure development;anatomical structure morphogenesis;apoptotic cell clearance;biological adhesion;biological regulation;blood coagulation;cell activation;cell adhesion;cell communication;cell differentiation;cell migration;cell morphogenesis;cell morphogenesis involved in differentiation;cell motility;cell surface receptor linked signaling pathway;cell-cell signaling;cell-substrate…	adenyl nucleotide binding;adenyl ribonucleotide binding;ATP binding;binding;catalytic activity;kinase activity;molecular transducer activity;nucleotide binding;phosphotransferase activity, alcohol group as acceptor;protein kinase activity;protein tyrosine kinase activity;purine nucleotide binding;purine ribonucleoside triphosphate binding;purine ribonucleotide binding;receptor activity;ribonucleo…	cell part;cell projection;cilium;cytoplasm;extracellular region part;extracellular space;integral to membrane;integral to plasma membrane;intracellular part;intrinsic to membrane;intrinsic to plasma membrane;membrane;membrane part;nonmotile primary cilium;photoreceptor outer segment;plasma membrane;plasma membrane part;primary cilium;rhabdomere	fn3;I-set;Pkinase_Tyr	31	28	40.9	38.5	110.25	0	323.31	15475000000	1.08428	0.977535	1.14142	1.35015	3.64174	3.5979	3.11949	2.85903	3.14471	2.97706	2.9586	3.17185	2.25693	2.60722	3.39559	3.05673	3.1828	3.13963	2.76048	2.73492	1.89505	1.71086	2.76751	2.63971	2.72052	3.20274	2.24094	2.45657	3.27435	3.2594	2.46949	2.88056	2.88755	3.26889
P08581;P08581-2;P08581-3;H7C174;C9JKM5;H7C130;Q9H3Y6	P08581;P08581-2;P08581-3	Hepatocyte growth factor receptor	MET	actin cytoskeleton organization;actin filament-based process;activation of MAPK activity;adult behavior;anatomical structure development;anatomical structure morphogenesis;axon guidance;behavior;biological regulation;brain development;branching morphogenesis of a tube;carbohydrate homeostasis;cell communication;cell differentiation;cell migration;cell morphogenesis;cell morphogenesis involved in …	adenyl nucleotide binding;adenyl ribonucleotide binding;ATP binding;binding;catalytic activity;enzyme binding;hepatocyte growth factor-activated receptor activity;kinase activity;molecular transducer activity;non-membrane spanning protein tyrosine kinase activity;nucleotide binding;phosphatase binding;phosphotransferase activity, alcohol group as acceptor;protein binding;protein kinase activity;p…	basal plasma membrane;cell part;cell surface;cytoplasm;extracellular region;extrinsic to internal side of plasma membrane;extrinsic to membrane;extrinsic to plasma membrane;integral to membrane;integral to plasma membrane;intracellular part;intrinsic to membrane;intrinsic to plasma membrane;membrane;membrane part;plasma membrane;plasma membrane part	Pkinase_Tyr;PSI;Sema;SH2;SH3_9;TIG	121	118	75.6	74.9	155.54	0	323.31	685900000000	7.61674	7.81847	7.26211	7.88088	8.81146	8.8779	8.45248	8.42144	8.57927	8.92567	8.60514	8.69171	7.92516	8.30424	8.57466	8.4573	8.50661	8.30156	8.59293	8.48029	7.89684	7.54211	8.33933	8.26379	8.30814	8.56421	7.83207	7.92304	8.66336	8.44626	8.17132	8.36057	8.64016	8.79865
Q9BUB5-2;Q9BUB5;Q9BUB5-3;E9PPI6;E9PJH1;E9PIA0;Q7Z319;E9PN34;E9PSE0;E9PLE7;E9PMF1;E9PMM8	Q9BUB5-2;Q9BUB5;Q9BUB5-3;E9PPI6;E9PJH1;E9PIA0;Q7Z319	MAP kinase-interacting serine/threonine-protein kinase 1	MKNK1	biological regulation;cell surface receptor linked signaling pathway;cellular macromolecule metabolic process;cellular metabolic process;cellular process;cellular protein metabolic process;cellular response to chemical stimulus;cellular response to fibroblast growth factor stimulus;cellular response to growth factor stimulus;cellular response to organic substance;cellular response to stimulus;enz…	adenyl nucleotide binding;adenyl ribonucleotide binding;ATP binding;binding;calcium-dependent protein kinase activity;calcium-dependent protein serine/threonine kinase activity;calmodulin binding;calmodulin-dependent protein kinase activity;catalytic activity;kinase activity;nucleotide binding;phosphotransferase activity, alcohol group as acceptor;protein binding;protein kinase activity;protein s…	cell part;cytoplasm;cytoplasmic part;cytosol;intracellular membrane-bounded organelle;intracellular organelle;intracellular part;membrane-bounded organelle;nucleus;organelle	Pkinase	6	6	19.1	19.1	47.402	0	28.111	744130000	NaN	-2.60701	NaN	-2.6882	-0.148666	-1.22929	-0.388456	-0.72378	-0.953796	-1.33702	-2.70998	-2.6362	-1.69539	-1.01788	-0.873812	-0.567059	-0.605768	-1.82882	-1.03884	-0.461418	-1.13467	-4.33709	-0.598206	-1.16108	-0.779289	-0.821425	-2.95852	-0.643848	0.00390434	-0.479527	-0.685202	-0.819902	-0.63825	-1.51383
Q5TCX8;Q5TCX8-2;X6R610;Q5TCX8-3	Q5TCX8;Q5TCX8-2	Mitogen-activated protein kinase kinase kinase MLK4	MLK4	activation of JUN kinase activity;activation of MAPK activity;biological regulation;cellular macromolecule metabolic process;cellular metabolic process;cellular process;cellular protein metabolic process;macromolecule metabolic process;macromolecule modification;metabolic process;phosphate-containing compound metabolic process;phosphorus metabolic process;phosphorylation;positive regulation of ca…	adenyl nucleotide binding;adenyl ribonucleotide binding;ATP binding;binding;catalytic activity;identical protein binding;kinase activity;MAP kinase kinase kinase activity;molecular transducer activity;nucleotide binding;phosphotransferase activity, alcohol group as acceptor;protein binding;protein dimerization activity;protein homodimerization activity;protein kinase activity;protein serine/threo…		Pkinase_Tyr;SH3_9	22	20	30.5	29.3	113.96	0	118.81	5282200000	0.0345383	0.389965	-0.200819	0.323383	1.80259	1.80378	1.78475	1.72277	1.38537	1.98687	1.58622	1.45342	1.35236	1.54341	1.50299	1.62765	1.578	1.59412	1.61148	1.64744	1.1603	0.431862	1.65831	-0.173533	1.2434	0.441898	0.573507	-0.785315	2.34803	1.8419	1.16727	1.06877	1.03051	1.66707
Q04912-2;Q04912;J3KQS7;Q04912-5;Q04912-6	Q04912-2;Q04912;J3KQS7;Q04912-5	Macrophage-stimulating protein receptor;Macrophage-stimulating protein receptor alpha chain;Macrophage-stimulating protein receptor beta chain	MST1R	biological regulation;cell surface receptor linked signaling pathway;cellular component movement;cellular process;cellular response to stimulus;defense response;developmental process;enzyme linked receptor protein signaling pathway;fertilization;immune response;immune system process;innate immune response;multicellular organismal development;multicellular organismal process;multi-organism process…	adenyl nucleotide binding;adenyl ribonucleotide binding;ATP binding;binding;catalytic activity;enzyme binding;kinase activity;macrophage colony-stimulating factor receptor activity;molecular transducer activity;nucleotide binding;phosphotransferase activity, alcohol group as acceptor;protein binding;protein kinase activity;protein tyrosine kinase activity;purine nucleotide binding;purine ribonucl…	actin filament bundle;actomyosin;cell part;cell surface;cytoskeletal part;integral to membrane;integral to plasma membrane;intracellular organelle part;intracellular part;intrinsic to membrane;intrinsic to plasma membrane;membrane part;organelle part;plasma membrane part;stress fiber	Pkinase_Tyr;Sema;TIG	29	2	31.5	2.4	147.28	0	323.31	11403000000	0.770281	1.60079	0.185232	1.50368	3.08288	3.51487	2.46243	2.10512	2.70216	3.3849	2.32252	2.8994	1.67311	2.19759	1.70093	2.12125	2.48897	2.3748	2.63108	2.03054	1.87098	1.63218	2.19088	1.09711	1.7983	1.3097	1.2469	1.36063	2.5355	2.49334	2.09224	2.347	2.64442	3.15553
B4E0Y9;Q9P289;Q8NBY1;Q9P289-3;Q9P289-2;C9JJV0	B4E0Y9;Q9P289;Q8NBY1;Q9P289-3;Q9P289-2	Serine/threonine-protein kinase MST4	MST4	activation of protein kinase activity;apoptosis;biological regulation;cell death;cell projection assembly;cell projection organization;cellular component assembly;cellular component assembly at cellular level;cellular component disassembly;cellular component disassembly at cellular level;cellular component disassembly involved in apoptosis;cellular component organization;cellular component organi…	adenyl nucleotide binding;adenyl ribonucleotide binding;ATP binding;binding;catalytic activity;cation binding;identical protein binding;ion binding;kinase activity;magnesium ion binding;metal ion binding;nucleotide binding;phosphotransferase activity, alcohol group as acceptor;protein binding;protein dimerization activity;protein homodimerization activity;protein kinase activity;protein serine/th…	apical plasma membrane;cell part;cell periphery;centrosome;cytoplasm;cytoplasmic membrane-bounded vesicle;cytoplasmic part;cytoplasmic vesicle;cytoskeletal part;cytosol;extracellular membrane-bounded organelle;extracellular organelle;extracellular region part;extracellular vesicular exosome;Golgi apparatus;Golgi apparatus part;Golgi membrane;Golgi-associated vesicle;intracellular membrane-bounded…	Pkinase	29	17	72.6	56.6	49.183	0	323.31	18439000000	1.66181	2.30088	1.36806	2.178	3.91996	3.9105	3.10268	2.88016	3.62713	3.65815	3.4513	3.80146	2.65482	3.14714	3.14829	2.88969	3.01041	3.07155	3.2835	3.36688	2.79511	2.63256	3.03783	2.63755	3.41215	3.48077	1.99162	2.45624	3.40345	3.06666	3.09673	3.13883	3.55465	3.81474
Q15746-9;Q15746-11;Q15746-7;Q15746-4;Q15746-5;Q15746-2;Q15746-3;Q15746-6;Q15746	Q15746-9;Q15746-11;Q15746-7;Q15746-4;Q15746-5;Q15746-2;Q15746-3;Q15746-6;Q15746	Myosin light chain kinase, smooth muscle;Myosin light chain kinase, smooth muscle, deglutamylated form	MYLK	actin cytoskeleton organization;actin filament organization;actin filament-based process;anatomical structure morphogenesis;aorta smooth muscle tissue morphogenesis;biological regulation;bleb assembly;cell projection assembly;cell projection organization;cellular component assembly;cellular component assembly at cellular level;cellular component organization;cellular component organization at cel…	adenyl nucleotide binding;adenyl ribonucleotide binding;ATP binding;binding;calmodulin-dependent protein kinase activity;catalytic activity;cation binding;ion binding;kinase activity;metal ion binding;myosin light chain kinase activity;nucleotide binding;phosphotransferase activity, alcohol group as acceptor;protein kinase activity;protein serine/threonine kinase activity;purine nucleotide bindin…	actin filament bundle;actomyosin;cell division site part;cell junction;cell part;cell projection;cell-cell junction;cleavage furrow;cytoplasm;cytoplasmic part;cytoskeletal part;cytosol;extracellular membrane-bounded organelle;extracellular organelle;extracellular region part;extracellular vesicular exosome;intracellular organelle part;intracellular part;lamellipodium;membrane-bounded organelle;me…	fn3;I-set;Pkinase	1	1	1.1	1.1	80.409	0.0018832	4.8392	46474000000	3.56481	3.99013	2.82978	3.30345	4.58151	4.58462	4.57533	4.17528	5.34489	4.87376	4.7923	4.64417	4.24228	3.8733	5.00027	4.10174	4.5853	4.09299	4.74515	4.47861	4.48793	3.86665	4.38962	4.38162	4.31794	4.18631	4.25281	3.64183	4.88215	4.31617	4.18634	4.50529	4.93252	4.83145
Q96PY6-4;Q96PY6-2;Q96PY6-6;Q96PY6;Q96PY6-3;Q96PY6-5;H0Y8M6	Q96PY6-4;Q96PY6-2;Q96PY6-6;Q96PY6;Q96PY6-3;Q96PY6-5	Serine/threonine-protein kinase Nek1	NEK1	activation of MAPK activity;anatomical structure formation involved in morphogenesis;biological regulation;cell cycle phase;cell cycle process;cell division;cell projection assembly;cell projection organization;cellular component assembly;cellular component assembly at cellular level;cellular component assembly involved in morphogenesis;cellular component organization;cellular component organizat…	adenyl nucleotide binding;adenyl ribonucleotide binding;ATP binding;binding;catalytic activity;cation binding;ion binding;kinase activity;MAP kinase kinase activity;metal ion binding;nucleotide binding;phosphotransferase activity, alcohol group as acceptor;protein kinase activity;protein serine/threonine kinase activity;protein serine/threonine/tyrosine kinase activity;protein tyrosine kinase act…	cell part;centrosome;cytoplasm;cytoplasmic part;cytoskeletal part;intracellular membrane-bounded organelle;intracellular non-membrane-bounded organelle;intracellular organelle;intracellular organelle part;intracellular part;membrane-bounded organelle;microtubule organizing center;microtubule organizing center part;non-membrane-bounded organelle;nucleus;organelle;organelle part;pericentriolar mate…	Pkinase	11	11	13.2	13.2	135.3	0	28.452	685220000	-2.24172	-2.78979	-3.66223	-1.21422	-2.05017	-1.04583	-1.21404	-1.40735	-1.16041	-0.821959	-0.39076	-2.96862	-2.45396	-1.99151	-3.42456	-1.48002	-1.69756	-1.8052	-1.72026	-1.79542	-1.16253	-2.60038	-1.51059	-1.42145	-3.4645	-1.18559	-4.0208	-2.73502	-0.147543	-1.47846	-0.923021	-1.19286	-1.32873	-1.17827
P51955;F6U4U2;P51955-3;P51955-2;P51955-4	P51955;F6U4U2;P51955-3;P51955-2;P51955-4	Serine/threonine-protein kinase Nek2	NEK2	anaphase-promoting complex-dependent proteasomal ubiquitin-dependent protein catabolic process;anatomical structure development;biological regulation;blastocyst development;catabolic process;cell cycle;cell cycle phase;cell cycle process;cell division;cellular catabolic process;cellular component assembly;cellular component assembly at cellular level;cellular component organization;cellular compo…	adenyl nucleotide binding;adenyl ribonucleotide binding;ATP binding;binding;catalytic activity;cation binding;enzyme binding;ion binding;kinase activity;metal ion binding;nucleotide binding;phosphatase binding;phosphotransferase activity, alcohol group as acceptor;protein binding;protein kinase activity;protein phosphatase binding;protein serine/threonine kinase activity;purine nucleotide binding…	cell part;centrosome;chromosomal part;chromosome;condensed chromosome;condensed chromosome kinetochore;condensed nuclear chromosome;cytoplasm;cytoplasmic part;cytoskeletal part;cytosol;extracellular region part;intercellular bridge;intracellular membrane-bounded organelle;intracellular non-membrane-bounded organelle;intracellular organelle;intracellular organelle part;intracellular part;kinetocho…	Pkinase	12	11	40.7	38.9	51.763	0	125.04	2800300000	-2.51968	-1.04582	NaN	-1.49039	1.14234	1.28787	0.632824	1.03104	1.45596	1.08301	0.634689	0.673641	0.152739	1.70125	0.815205	0.657238	0.541327	0.702305	0.408934	0.579407	0.0144215	-0.160879	0.378426	0.223124	0.370972	1.1545	0.0760078	0.924259	0.847809	0.493372	-0.108051	0.248035	1.35815	1.29886
A0A087WY58;P51956;P51956-2;A0A087X203;F8VV00;F8VTT4;A0A087X030	A0A087WY58;P51956;P51956-2;A0A087X203	Serine/threonine-protein kinase Nek3	NEK3	cell cycle phase;cell cycle process;cell division;cellular component organization;cellular component organization at cellular level;cellular component organization or biogenesis;cellular component organization or biogenesis at cellular level;cellular macromolecule metabolic process;cellular metabolic process;cellular process;cellular protein metabolic process;macromolecule metabolic process;macro…	adenyl nucleotide binding;adenyl ribonucleotide binding;ATP binding;binding;catalytic activity;cation binding;ion binding;kinase activity;metal ion binding;nucleotide binding;phosphotransferase activity, alcohol group as acceptor;protein kinase activity;protein serine/threonine kinase activity;purine nucleotide binding;purine ribonucleoside triphosphate binding;purine ribonucleotide binding;ribon…	axon;cell part;cell projection;cytoplasm;intracellular membrane-bounded organelle;intracellular organelle;intracellular part;membrane-bounded organelle;neuron projection;nucleus;organelle	Pkinase	25	25	69.4	69.4	56.684	0	234.59	26279000000	2.30982	2.78793	2.14443	2.67921	4.27902	4.46285	2.91133	3.07788	4.1465	4.43145	4.65092	4.24572	2.30418	3.49874	2.95645	3.16781	3.36895	3.31683	3.23543	2.92269	2.41492	2.32098	3.44602	3.28015	3.12266	3.3948	2.31518	3.05781	3.30877	3.61356	2.91861	3.09929	4.2088	4.41708
Q8TD19;G3V2Z5;G3V459;G3V5V0	Q8TD19	Serine/threonine-protein kinase Nek9	NEK9	cell cycle;cell cycle phase;cell cycle process;cell division;cellular component disassembly;cellular component disassembly at cellular level;cellular component organization;cellular component organization at cellular level;cellular component organization or biogenesis;cellular component organization or biogenesis at cellular level;cellular macromolecule metabolic process;cellular membrane organiz…	adenyl nucleotide binding;adenyl ribonucleotide binding;ATP binding;binding;catalytic activity;cation binding;enzyme binding;ion binding;kinase activity;kinase binding;metal ion binding;nucleotide binding;phosphotransferase activity, alcohol group as acceptor;protein binding;protein kinase activity;protein kinase binding;protein serine/threonine kinase activity;purine nucleotide binding;purine ri…	cell part;cytoplasmic part;cytosol;intracellular membrane-bounded organelle;intracellular organelle;intracellular part;membrane-bounded organelle;nucleus;organelle	Pkinase;RCC1	116	115	83.4	83.4	107.17	0	323.31	2564500000000	9.51574	9.72091	9.0302	9.70378	10.5735	10.5915	10.4877	10.1495	10.5165	10.7082	10.5199	10.3508	10.2177	10.4555	10.6593	10.5962	10.3177	10.2616	10.2767	10.511	10.0267	9.53782	10.4201	10.3338	10.2777	10.4959	10.2581	10.1298	10.5367	10.412	10.2009	10.2738	10.3115	10.576
O60285;F8VXF0;F8VSH4;O60285-2	O60285	NUAK family SNF1-like kinase 1	NUAK1	biological adhesion;biological regulation;cell adhesion;cell communication;cellular macromolecule metabolic process;cellular metabolic process;cellular process;cellular protein metabolic process;cellular response to external stimulus;cellular response to extracellular stimulus;cellular response to glucose starvation;cellular response to nutrient levels;cellular response to starvation;cellular res…	adenyl nucleotide binding;adenyl ribonucleotide binding;ATP binding;binding;catalytic activity;cation binding;ion binding;kinase activity;metal ion binding;nucleotide binding;p53 binding;phosphotransferase activity, alcohol group as acceptor;protein binding;protein kinase activity;protein serine/threonine kinase activity;purine nucleotide binding;purine ribonucleoside triphosphate binding;purine …	AMP-activated protein kinase complex;cell part;cytoplasm;cytoskeleton;intracellular membrane-bounded organelle;intracellular non-membrane-bounded organelle;intracellular organelle;intracellular organelle part;intracellular part;macromolecular complex;membrane-bounded organelle;microtubule cytoskeleton;non-membrane-bounded organelle;nuclear part;nucleolus;nucleus;organelle;organelle part;protein c…	Pkinase	5	3	15.7	10.3	74.304	0.00075873	12.047	906310000	-2.94283	-2.70908	-4.12981	-3.89691	-0.876617	-0.625393	0.182068	-0.0507565	-2.13172	-1.03108	NaN	-1.0712	-2.42138	-0.277741	-0.698841	-0.451933	0.369949	-0.434347	0.424864	0.121725	-0.776285	-1.88193	0.437494	0.0198975	0.297115	0.556463	-2.77848	-1.08952	0.794941	0.241919	-0.0024147	0.252459	NaN	-2.21253
O96013;O96013-4;O96013-2;O96013-3;M0R2X4;M0R1R1;M0R0L9;M0R3G6;Q9P286;Q9NQU5-2;Q9NQU5	O96013;O96013-4;O96013-2;O96013-3	Serine/threonine-protein kinase PAK 4	PAK4	actin cytoskeleton organization;actin filament-based process;activation of protein kinase activity;apoptosis;behavior;biological regulation;cell cycle;cell death;cell growth;cell migration;cell motility;cell proliferation;cellular component movement;cellular component organization;cellular component organization at cellular level;cellular component organization or biogenesis;cellular component or…	adenyl nucleotide binding;adenyl ribonucleotide binding;ATP binding;binding;catalytic activity;enzyme binding;GTPase binding;kinase activity;nucleotide binding;phosphotransferase activity, alcohol group as acceptor;protein binding;protein kinase activity;protein serine/threonine kinase activity;purine nucleotide binding;purine ribonucleoside triphosphate binding;purine ribonucleotide binding;Rac …	adherens junction;anchoring junction;cell junction;cell part;cell-substrate adherens junction;cell-substrate junction;cytoplasm;cytoplasmic part;focal adhesion;Golgi apparatus;intracellular membrane-bounded organelle;intracellular organelle;intracellular part;membrane-bounded organelle;mitochondrion;nucleus;organelle	PBD;Pkinase	57	57	79.5	79.5	64.071	0	323.31	323890000000	6.57684	6.97284	5.73967	6.45377	7.4426	7.52713	7.45559	7.28759	7.70367	7.68245	7.52386	7.4402	7.11963	7.57331	7.54957	7.38206	7.3122	7.22425	7.26343	6.98128	6.39909	5.92168	7.24	7.06309	7.20601	7.232	7.17598	7.13731	7.55319	7.47244	7.02861	7.20742	5.90829	5.99814
O15530-3;O15530;E9PER6;O15530-2;O15530-5;O15530-4;Q6A1A2;H3BQ10	O15530-3;O15530;E9PER6;O15530-2;O15530-5;O15530-4;Q6A1A2	3-phosphoinositide-dependent protein kinase 1;Putative 3-phosphoinositide-dependent protein kinase 2	PDPK1/2	actin cytoskeleton organization;actin filament-based process;activation of immune response;activation of innate immune response;activation of protein kinase activity;activation of protein kinase B activity;anatomical structure development;antigen receptor-mediated signaling pathway;biological regulation;biosynthetic process;blood coagulation;calcium-mediated signaling;cell activation;cell communi…	3-phosphoinositide-dependent protein kinase activity;adenyl nucleotide binding;adenyl ribonucleotide binding;ATP binding;binding;catalytic activity;enzyme activator activity;enzyme binding;enzyme regulator activity;kinase activity;lipase activator activity;nucleotide binding;phospholipase activator activity;phospholipase binding;phosphotransferase activity, alcohol group as acceptor;protein bindi…	adherens junction;anchoring junction;cell junction;cell part;cell projection;cell-substrate adherens junction;cell-substrate junction;cytoplasm;cytoplasmic membrane-bounded vesicle;cytoplasmic part;cytoplasmic vesicle;cytosol;focal adhesion;intracellular membrane-bounded organelle;intracellular organelle;intracellular organelle part;intracellular part;membrane;membrane-bounded organelle;membrane-…	Pkinase	19	19	46.6	46.6	60.395	0	75.399	4717500000	-0.176872	-0.156302	-0.550516	-0.949844	1.60591	1.67381	1.60201	0.997028	1.32526	1.21905	1.30512	1.58673	0.544886	0.812143	1.25507	1.3037	0.765175	0.594177	1.46222	1.51037	1.01734	1.01366	1.3374	1.52125	1.11107	1.37527	0.230845	1.11096	1.72939	1.94871	1.37821	0.41815	1.06043	1.2192
H3BN16;H3BP07;H3BTW6;J3KNN3;P15735-2;P15735	H3BN16;H3BP07;H3BTW6;J3KNN3;P15735-2;P15735	Phosphorylase b kinase gamma catalytic chain, liver/testis isoform	PHKG2	alcohol metabolic process;biological regulation;biosynthetic process;carbohydrate biosynthetic process;carbohydrate catabolic process;carbohydrate metabolic process;catabolic process;cellular biosynthetic process;cellular carbohydrate biosynthetic process;cellular carbohydrate catabolic process;cellular carbohydrate metabolic process;cellular glucan metabolic process;cellular macromolecule biosyn…	adenyl nucleotide binding;adenyl ribonucleotide binding;ATP binding;binding;calmodulin-dependent protein kinase activity;catalytic activity;kinase activity;nucleotide binding;phosphorylase kinase activity;phosphotransferase activity, alcohol group as acceptor;protein kinase activity;protein serine/threonine kinase activity;purine nucleotide binding;purine ribonucleoside triphosphate binding;purin…	cell part;cytoplasmic part;cytosol;intracellular part;macromolecular complex;phosphorylase kinase complex;protein complex	Pkinase	1	1	19.5	19.5	9.6668	0.0045872	3.0951	16439000	NaN	NaN	NaN	NaN	NaN	NaN	NaN	-2.74142	NaN	NaN	NaN	NaN	NaN	NaN	NaN	NaN	NaN	NaN	-2.25209	NaN	NaN	NaN	NaN	NaN	NaN	NaN	NaN	NaN	NaN	NaN	NaN	NaN	NaN	NaN
A8MYT4;Q8NEB9;M0R308;M0R386;A0A0B4J2B1	A8MYT4;Q8NEB9;M0R308	Phosphatidylinositol 3-kinase;Phosphatidylinositol 3-kinase catalytic subunit type 3	PIK3C3	activation of immune response;activation of innate immune response;autophagic vacuole assembly;autophagy;biological regulation;biosynthetic process;catabolic process;cell communication;cell surface receptor linked signaling pathway;cellular biosynthetic process;cellular catabolic process;cellular component assembly;cellular component assembly at cellular level;cellular component organization;cell…	1-phosphatidylinositol-3-kinase activity;adenyl nucleotide binding;adenyl ribonucleotide binding;ATP binding;binding;catalytic activity;inositol or phosphatidylinositol kinase activity;kinase activity;lipid kinase activity;nucleotide binding;phosphatidylinositol 3-kinase activity;phosphatidylinositol kinase activity;phosphotransferase activity, alcohol group as acceptor;protein kinase activity;pu…	axoneme;cell part;cell projection part;cytoplasmic membrane-bounded vesicle;cytoplasmic part;cytoplasmic vesicle;cytosol;cytosolic part;endocytic vesicle;endosome;intracellular membrane-bounded organelle;intracellular organelle;intracellular part;late endosome;macromolecular complex;membrane;membrane-bounded organelle;membrane-bounded vesicle;microbody;midbody;organelle;organelle part;peroxisome;…	PI3_PI4_kinase;PI3K_C2;PI3Ka	5	5	15.7	15.7	94.399	0.0013351	6.7719	1009000000	NaN	NaN	NaN	NaN	NaN	NaN	2.47657	2.37565	NaN	NaN	NaN	-3.37304	NaN	NaN	NaN	NaN	2.11316	1.21764	1.50354	2.36905	-0.758104	0.0350475	1.22271	NaN	-0.732515	NaN	NaN	NaN	-4.21373	-5.27401	-0.0766983	-0.99497	NaN	NaN
P48426;P48426-2;H7BXS3;S4R320	P48426;P48426-2;H7BXS3	Phosphatidylinositol 5-phosphate 4-kinase type-2 alpha	PIP4K2A	anatomical structure development;biosynthetic process;cell development;cellular biosynthetic process;cellular developmental process;cellular lipid metabolic process;cellular metabolic process;cellular process;developmental process;glycerolipid biosynthetic process;glycerolipid metabolic process;glycerophospholipid biosynthetic process;glycerophospholipid metabolic process;lipid biosynthetic proce…	1-phosphatidylinositol-4-phosphate 5-kinase activity;1-phosphatidylinositol-5-phosphate 4-kinase activity;adenyl nucleotide binding;adenyl ribonucleotide binding;ATP binding;binding;catalytic activity;inositol or phosphatidylinositol kinase activity;kinase activity;lipid kinase activity;nucleotide binding;phosphatidylinositol phosphate kinase activity;phosphotransferase activity, alcohol group as…	cell part;cytoplasmic part;cytosol;intracellular membrane-bounded organelle;intracellular organelle;intracellular part;membrane;membrane-bounded organelle;nucleus;organelle;plasma membrane	PIP5K	11	7	32.3	21.4	46.224	0	287.95	5980400000	0.578585	-0.682907	-0.749491	-0.0500755	2.07227	1.79876	1.34251	1.16315	1.22813	2.06297	0.856619	1.00661	2.03397	1.0429	2.29749	1.80281	1.60215	2.17695	2.2056	2.20692	1.67679	0.804169	1.63149	2.24794	1.85292	1.98222	2.02794	1.83149	2.08672	2.25908	2.34661	2.51463	0.510881	1.93516
P78356;P78356-2;A0A087WT35	P78356	Phosphatidylinositol 5-phosphate 4-kinase type-2 beta	PIP4K2B	biological regulation;biosynthetic process;cell surface receptor linked signaling pathway;cellular biosynthetic process;cellular lipid metabolic process;cellular metabolic process;cellular process;cellular response to stimulus;glycerolipid biosynthetic process;glycerolipid metabolic process;glycerophospholipid biosynthetic process;glycerophospholipid metabolic process;intracellular signal transdu…	1-phosphatidylinositol-4-phosphate 5-kinase activity;1-phosphatidylinositol-5-phosphate 4-kinase activity;adenyl nucleotide binding;adenyl ribonucleotide binding;ATP binding;binding;catalytic activity;inositol or phosphatidylinositol kinase activity;kinase activity;lipid kinase activity;molecular transducer activity;nucleotide binding;phosphatidylinositol phosphate kinase activity;phosphotransfer…	cell part;cytoplasmic part;cytosol;endoplasmic reticulum membrane;endoplasmic reticulum part;intracellular organelle part;intracellular part;membrane;membrane part;nuclear part;nucleoplasm;organelle membrane;organelle part;plasma membrane	PIP5K	10	6	27.9	19.5	47.377	0	128.03	1527100000	-2.83667	NaN	NaN	-2.75317	0.00288582	-1.00727	-3.47234	0.595882	-0.88134	-0.250238	-1.31133	-0.735104	0.0789032	0.933966	0.873749	0.343893	1.20421	0.456465	0.588812	1.29962	0.0744896	-0.798613	0.357666	-0.706949	-0.0415955	0.559395	0.515703	0.0754128	0.692717	1.01004	0.664616	1.45077	-0.218992	-0.373165
Q8TBX8;Q8TBX8-3;Q8TBX8-2;F8VNT5;F8VU68;H0YIJ6;F8VVB2	Q8TBX8;Q8TBX8-3;Q8TBX8-2	Phosphatidylinositol 5-phosphate 4-kinase type-2 gamma	PIP4K2C		1-phosphatidylinositol-5-phosphate 4-kinase activity;adenyl nucleotide binding;adenyl ribonucleotide binding;ATP binding;binding;catalytic activity;identical protein binding;inositol or phosphatidylinositol kinase activity;kinase activity;lipid kinase activity;nucleotide binding;phosphatidylinositol phosphate kinase activity;phosphotransferase activity, alcohol group as acceptor;protein binding;p…	cell part;cytoplasm;extracellular membrane-bounded organelle;extracellular organelle;extracellular region part;extracellular vesicular exosome;intracellular part;membrane;membrane-bounded organelle;membrane-bounded vesicle;organelle;vesicle	PIP5K	27	27	67.9	67.9	47.299	0	323.31	25170000000	1.23992	1.32616	-0.410854	1.86747	3.5176	3.7291	3.44991	3.52768	3.00405	3.07294	2.91716	3.02118	4.2897	4.65006	4.50868	4.37387	4.7948	4.71269	4.78956	4.22093	3.51293	3.4262	4.21084	3.99056	4.73228	4.44802	4.65789	4.49372	5.07516	4.8627	4.48177	4.82204	2.97828	3.29053
Q16512;Q16512-2;Q16512-3;K7EL10;K7EM57;K7EKY9;K7EN76	Q16512;Q16512-2;Q16512-3	Serine/threonine-protein kinase N1	PKN1	activation of JUN kinase activity;activation of MAPK activity;ameboidal cell migration;biological regulation;biosynthetic process;cell migration;cell motility;cellular biosynthetic process;cellular component movement;cellular component organization;cellular component organization at cellular level;cellular component organization or biogenesis;cellular component organization or biogenesis at cellu…	adenyl nucleotide binding;adenyl ribonucleotide binding;androgen receptor binding;ATP binding;binding;catalytic activity;chromatin binding;enzyme binding;GTPase binding;GTP-Rho binding;histone binding;histone deacetylase binding;histone kinase activity;histone kinase activity (H3-T11 specific);histone threonine kinase activity;hormone receptor binding;kinase activity;kinase binding;ligand-depende…	cell division site part;cell part;cleavage furrow;cytoplasm;cytoplasmic membrane-bounded vesicle;cytoplasmic part;cytoplasmic vesicle;cytosol;endosome;intracellular membrane-bounded organelle;intracellular organelle;intracellular organelle part;intracellular part;membrane;membrane-bounded organelle;membrane-bounded vesicle;midbody;nuclear part;nucleoplasm;nucleus;organelle;organelle part;plasma m…	HR1;Pkinase;Pkinase_C	27	26	40.4	39.6	103.93	0	323.31	13753000000	0.818914	0.273512	-0.882036	0.870232	2.99953	3.19396	3.38707	3.27665	2.81159	2.86931	2.69317	3.10624	2.85961	3.50474	2.97502	3.1927	3.42416	3.3548	3.59129	3.53998	3.18366	2.46247	3.21879	3.19605	3.25901	3.41833	2.38969	2.37514	3.54459	3.55166	3.09516	3.43441	2.72521	3.04144
Q16513-3;Q16513-2;Q16513;Q16513-4;B1AL79;Q16513-5;A0A0A0MRN8	Q16513-3;Q16513-2;Q16513;Q16513-4;B1AL79;Q16513-5	Serine/threonine-protein kinase N2	PKN2	ameboidal cell migration;apical junction assembly;apoptosis;biological adhesion;biological regulation;biosynthetic process;cell adhesion;cell cycle;cell death;cell division;cell junction assembly;cell junction organization;cell migration;cell motility;cell-cell junction assembly;cell-cell junction organization;cellular biosynthetic process;cellular component assembly;cellular component assembly a…	adenyl nucleotide binding;adenyl ribonucleotide binding;ATP binding;binding;catalytic activity;enzyme binding;histone deacetylase binding;kinase activity;nucleotide binding;phosphotransferase activity, alcohol group as acceptor;protein binding;protein kinase activity;protein kinase C activity;protein serine/threonine kinase activity;purine nucleotide binding;purine ribonucleoside triphosphate bin…	apical junction complex;cell division site part;cell junction;cell part;cell projection;cell-cell junction;centrosome;cleavage furrow;cytoplasm;cytoplasmic part;cytoskeletal part;cytoskeleton;cytosol;intermediate filament cytoskeleton;intracellular membrane-bounded organelle;intracellular non-membrane-bounded organelle;intracellular organelle;intracellular organelle part;intracellular part;lamell…	HR1;Pkinase;Pkinase_C	5	4	8.8	7.9	106.22	0	16.957	303640000	NaN	NaN	NaN	NaN	-2.99135	-2.38903	NaN	-2.01668	-2.86594	-2.65045	NaN	-1.49733	-3.00347	-2.6645	NaN	-2.56335	-3.079	-2.51136	-2.40466	NaN	-2.19021	-2.90114	-2.84207	NaN	-2.37145	NaN	-3.50049	-3.17579	-2.42395	NaN	NaN	NaN	-1.52726	-0.809509
P53350;I3L387;I3L2H5;I3L309	P53350	Serine/threonine-protein kinase PLK1	PLK1	activation of anaphase-promoting complex activity;activation of mitotic anaphase-promoting complex activity;anaphase-promoting complex-dependent proteasomal ubiquitin-dependent protein catabolic process;biological regulation;catabolic process;cell cycle;cell cycle checkpoint;cell cycle cytokinesis;cell cycle phase;cell cycle process;cell proliferation;cellular catabolic process;cellular component…	adenyl nucleotide binding;adenyl ribonucleotide binding;anaphase-promoting complex binding;ATP binding;binding;catalytic activity;cytoskeletal protein binding;enzyme binding;kinase activity;kinase binding;microtubule binding;nucleotide binding;phosphotransferase activity, alcohol group as acceptor;protein binding;protein complex binding;protein kinase activity;protein kinase binding;protein serin…	cell part;centrosome;chromosomal part;condensed chromosome outer kinetochore;condensed nuclear chromosome outer kinetochore;cytoplasm;cytoplasmic part;cytoskeletal part;cytoskeleton;cytosol;intracellular membrane-bounded organelle;intracellular non-membrane-bounded organelle;intracellular organelle;intracellular organelle part;intracellular part;kinetochore;macromolecular complex;membrane-bounded…	Pkinase;POLO_box	26	26	49.6	49.6	68.254	0	307.03	7709800000	-1.18335	-0.619034	-1.37303	-0.458099	2.85048	3.26588	2.07287	1.46277	2.63574	2.916	2.92447	2.72586	0.972813	0.645193	1.41421	1.25759	1.41976	1.92955	1.5691	1.4638	1.3118	0.668963	1.18819	1.6046	1.27383	1.46978	1.00683	0.953583	2.23157	1.834	1.33219	1.54123	2.4838	2.59341
O00444-2;O00444;J3KR82;J3KR84;O00444-3	O00444-2;O00444;J3KR82;J3KR84;O00444-3	Serine/threonine-protein kinase PLK4;Serine/threonine-protein kinase PLK	PLK4	biological regulation;cell cycle;cell cycle process;cell differentiation;cell differentiation involved in embryonic placenta development;cellular component organization;cellular component organization at cellular level;cellular component organization or biogenesis;cellular component organization or biogenesis at cellular level;cellular developmental process;cellular macromolecule metabolic proces…	adenyl nucleotide binding;adenyl ribonucleotide binding;ATP binding;binding;catalytic activity;kinase activity;nucleotide binding;phosphotransferase activity, alcohol group as acceptor;protein kinase activity;protein serine/threonine kinase activity;purine nucleotide binding;purine ribonucleoside triphosphate binding;purine ribonucleotide binding;ribonucleotide binding;transferase activity;transf…	cell division site part;cell part;centriole;centrosome;cleavage furrow;cytoplasmic part;cytoskeletal part;cytosol;intracellular non-membrane-bounded organelle;intracellular organelle;intracellular organelle part;intracellular part;microtubule organizing center;microtubule organizing center part;non-membrane-bounded organelle;nuclear part;nucleolus;organelle;organelle part	Pkinase;POLO_box	28	28	39.8	39.8	105.25	0	323.31	10300000000	0.774071	1.78529	-0.111591	0.991468	2.99821	3.15429	2.50094	1.93594	2.95928	3.00748	2.92278	3.20268	2.06114	2.07319	2.34331	2.30831	2.02337	1.60426	1.8222	1.34828	1.22577	1.00272	2.13297	1.70319	2.00721	2.00399	1.75128	1.84093	2.4232	2.07425	2.03873	1.9206	2.59913	2.56063
Q13131;Q13131-2;Q96E92	Q13131;Q13131-2	5-AMP-activated protein kinase catalytic subunit alpha-1	PRKAA1	activation of MAPK activity;alcohol metabolic process;autophagy;biological regulation;biosynthetic process;carbohydrate homeostasis;carbohydrate metabolic process;carboxylic acid biosynthetic process;carboxylic acid metabolic process;catabolic process;cell communication;cell cycle arrest;cell cycle process;cell surface receptor linked signaling pathway;cellular biosynthetic process;cellular carbo…	[acetyl-CoA carboxylase] kinase activity;[hydroxymethylglutaryl-CoA reductase (NADPH)] kinase activity;adenyl nucleotide binding;adenyl ribonucleotide binding;AMP-activated protein kinase activity;ATP binding;binding;cAMP-dependent protein kinase activity;catalytic activity;cation binding;chromatin binding;cyclic nucleotide-dependent protein kinase activity;histone kinase activity;histone serine …	AMP-activated protein kinase complex;apical plasma membrane;cell part;cytoplasm;cytoplasmic part;cytosol;intracellular;intracellular membrane-bounded organelle;intracellular organelle;intracellular organelle part;intracellular part;macromolecular complex;membrane part;membrane-bounded organelle;nuclear part;nucleoplasm;nucleus;organelle;organelle part;plasma membrane part;protein complex	Pkinase	64	54	90.2	77.6	64.009	0	323.31	695720000000	7.45812	7.77234	6.52569	7.49634	8.72874	8.98013	8.61084	8.57869	8.8102	8.76564	8.70429	8.67888	7.9693	8.1145	8.49836	8.62872	8.726	8.39162	8.69286	8.28739	8.00507	7.42123	8.31185	8.16549	8.75559	8.68052	8.05597	8.13158	9.19429	8.66367	8.53884	8.59377	7.86076	8.13471
P54646;A0A087WXX9	P54646;A0A087WXX9	5-AMP-activated protein kinase catalytic subunit alpha-2	PRKAA2	alcohol metabolic process;amine transport;amino acid transmembrane transport;amino acid transport;autophagy;betaine transport;biological regulation;biosynthetic process;carbohydrate homeostasis;carboxylic acid biosynthetic process;carboxylic acid metabolic process;carboxylic acid transport;carnitine shuttle;carnitine transport;catabolic process;cation transport;cell communication;cell cycle arres…	[acetyl-CoA carboxylase] kinase activity;[hydroxymethylglutaryl-CoA reductase (NADPH)] kinase activity;adenyl nucleotide binding;adenyl ribonucleotide binding;AMP-activated protein kinase activity;ATP binding;binding;catalytic activity;cation binding;chromatin binding;histone kinase activity;histone serine kinase activity;ion binding;kinase activity;metal ion binding;nucleotide binding;phosphotra…	AMP-activated protein kinase complex;cell part;cytoplasm;cytoplasmic part;cytosol;intracellular organelle part;intracellular part;macromolecular complex;nuclear part;nucleoplasm;organelle part;protein complex	Pkinase	47	37	84.8	69.9	62.319	0	323.31	73462000000	4.6766	4.58221	3.95763	4.46089	5.37319	5.57128	5.28314	5.44507	5.23344	5.54539	5.15494	5.2069	4.52154	5.04535	5.36693	5.56079	5.08068	5.19157	5.22366	5.02782	4.57336	4.39853	4.75173	4.75231	5.16613	5.33675	4.52826	5.04855	5.7042	5.34642	4.91131	5.01689	4.9738	4.94413
P17612-2;P17612;Q15136;K7ERP6;K7EMV1;K7ENJ5	P17612-2;P17612;Q15136;K7ERP6	cAMP-dependent protein kinase catalytic subunit alpha	PRKACA	activation of immune response;activation of innate immune response;activation of phospholipase C activity;activation of protein kinase A activity;activation of protein kinase activity;acylglycerol catabolic process;acylglycerol metabolic process;alcohol biosynthetic process;alcohol metabolic process;anatomical structure formation involved in morphogenesis;biological regulation;biosynthetic proces…	adenyl nucleotide binding;adenyl ribonucleotide binding;ATP binding;binding;cAMP-dependent protein kinase activity;catalytic activity;cyclic nucleotide-dependent protein kinase activity;enzyme binding;kinase activity;kinase binding;nucleotide binding;phosphotransferase activity, alcohol group as acceptor;protein binding;protein kinase A binding;protein kinase A regulatory subunit binding;protein …	AMP-activated protein kinase complex;calcium channel complex;cAMP-dependent protein kinase complex;cation channel complex;cell part;cell projection;centrosome;cilium;cytoplasmic part;cytoskeletal part;cytosol;extracellular membrane-bounded organelle;extracellular organelle;extracellular region part;extracellular vesicular exosome;intracellular membrane-bounded organelle;intracellular non-membrane…	Pkinase	19	4	56.6	19.2	39.821	0	84.022	6319800000	1.3956	1.21251	-0.186079	1.60041	3.20173	2.86397	-2.50041	0.726498	2.51981	3.11479	2.60632	2.53262	0.523247	-0.230261	0.899921	1.05413	-2.08131	0.672834	-0.410276	1.03659	0.691546	0.536026	-2.91659	0.928644	-1.99964	-3.02427	0.222458	0.380934	-1.47032	0.243576	-3.61496	0.775291	2.85174	2.97728
P22694-2	P22694-2	cAMP-dependent protein kinase catalytic subunit beta	PRKACB	activation of immune response;activation of innate immune response;activation of phospholipase C activity;activation of protein kinase A activity;activation of protein kinase activity;acylglycerol catabolic process;acylglycerol metabolic process;alcohol biosynthetic process;alcohol metabolic process;anatomical structure formation involved in morphogenesis;biological regulation;biosynthetic proces…	adenyl nucleotide binding;adenyl ribonucleotide binding;ATP binding;binding;cAMP-dependent protein kinase activity;catalytic activity;cation binding;cyclic nucleotide-dependent protein kinase activity;enzyme binding;ion binding;kinase activity;magnesium ion binding;metal ion binding;nucleotide binding;phosphotransferase activity, alcohol group as acceptor;protein binding;protein kinase activity;p…	cAMP-dependent protein kinase complex;cell part;centrosome;cytoplasmic part;cytoskeletal part;cytosol;extracellular membrane-bounded organelle;extracellular organelle;extracellular region part;extracellular vesicular exosome;intracellular non-membrane-bounded organelle;intracellular organelle;intracellular organelle part;intracellular part;macromolecular complex;membrane;membrane-bounded organell…	Pkinase	21	2	52.5	9.8	46.235	0	323.31	21831000000	2.48776	2.93358	2.20463	3.31383	4.55609	4.76955	1.75691	1.73898	4.12007	4.43731	3.78519	4.57278	1.299	1.41515	2.04343	1.68861	1.97919	0.898989	1.42918	1.33021	1.38398	1.92633	1.20458	1.46277	0.875179	0.811281	0.494963	0.852892	1.66462	2.00809	0.794153	0.779676	4.63398	4.52412
P22612	P22612	cAMP-dependent protein kinase catalytic subunit gamma	PRKACG	activation of immune response;activation of innate immune response;activation of phospholipase C activity;activation of protein kinase A activity;activation of protein kinase activity;acylglycerol catabolic process;acylglycerol metabolic process;alcohol biosynthetic process;alcohol metabolic process;anatomical structure development;biological regulation;biosynthetic process;blood coagulation;carb…	adenyl nucleotide binding;adenyl ribonucleotide binding;ATP binding;binding;cAMP-dependent protein kinase activity;catalytic activity;cyclic nucleotide-dependent protein kinase activity;kinase activity;nucleotide binding;phosphotransferase activity, alcohol group as acceptor;protein kinase activity;protein serine/threonine kinase activity;purine nucleotide binding;purine ribonucleoside triphospha…	cell part;cytoplasmic part;cytosol;intracellular organelle part;intracellular part;nuclear part;nucleoplasm;organelle part	Pkinase	4	2	14	11.4	40.434	0	14.189	113440000	NaN	NaN	NaN	NaN	-1.10427	NaN	NaN	NaN	NaN	NaN	NaN	NaN	NaN	NaN	NaN	NaN	NaN	NaN	NaN	NaN	NaN	NaN	NaN	NaN	NaN	NaN	NaN	NaN	NaN	NaN	NaN	NaN	-1.49081	NaN
Q05655;Q05655-2;C9K0E3;C9JZU8;C9J9P1	Q05655;Q05655-2	Protein kinase C delta type;Protein kinase C delta type regulatory subunit;Protein kinase C delta type catalytic subunit	PRKCD	activation of immune response;activation of innate immune response;activation of phospholipase C activity;adaptive immune response;adaptive immune response based on somatic recombination of immune receptors built from immunoglobulin superfamily domains;aging;apoptosis;B cell activation;B cell mediated immunity;B cell proliferation;biological regulation;blood coagulation;cell activation;cell aging…	adenyl nucleotide binding;adenyl ribonucleotide binding;ATP binding;binding;calcium-independent protein kinase C activity;catalytic activity;cation binding;enzyme activator activity;enzyme binding;enzyme regulator activity;insulin receptor substrate binding;ion binding;kinase activity;metal ion binding;non-membrane spanning protein tyrosine kinase activity;nucleotide binding;phosphotransferase ac…	cell junction;cell part;cell-cell junction;cytoplasm;cytoplasmic part;cytosol;endoplasmic reticulum;extracellular membrane-bounded organelle;extracellular organelle;extracellular region part;extracellular vesicular exosome;intracellular membrane-bounded organelle;intracellular organelle;intracellular organelle part;intracellular part;membrane;membrane-bounded organelle;membrane-bounded vesicle;mi…	C1_1;Pkinase;Pkinase_C	7	6	18.2	16.7	77.504	0.00072833	9.8762	463820000	NaN	NaN	NaN	NaN	-0.843895	-1.22122	NaN	-0.701744	-1.83928	-2.98564	-1.7553	-1.88046	-1.50719	-1.98007	-1.4331	-0.709885	-0.93046	NaN	-0.330174	-0.323736	NaN	NaN	NaN	NaN	-0.341793	-0.980978	-1.1395	NaN	-0.264988	-1.01103	NaN	-0.5128	-1.0756	-1.31335
Q04759-2;Q04759;A0A087X0I9;Q04759-3	Q04759-2;Q04759;A0A087X0I9;Q04759-3	Protein kinase C theta type	PRKCQ	activation of immune response;antigen receptor-mediated signaling pathway;apoptosis;axon guidance;biological regulation;blood coagulation;cell activation;cell death;cell surface receptor linked signaling pathway;cellular component disassembly;cellular component disassembly at cellular level;cellular component disassembly involved in apoptosis;cellular component organization;cellular component org…	acid-amino acid ligase activity;adenyl nucleotide binding;adenyl ribonucleotide binding;ATP binding;binding;catalytic activity;cation binding;ion binding;kinase activity;ligase activity;ligase activity, forming carbon-nitrogen bonds;metal ion binding;nucleotide binding;phosphotransferase activity, alcohol group as acceptor;protein kinase activity;protein kinase C activity;protein serine/threonine…	cell part;cytoplasmic part;cytosol;immunological synapse;intracellular part;membrane;membrane part;plasma membrane;plasma membrane part	C1_1;Pkinase;Pkinase_C	17	16	38.3	36.7	74.286	0	280.83	5116300000	-0.211056	0.217384	-0.393053	-0.509972	1.89413	2.01846	1.68396	1.46727	1.65339	2.12348	1.88557	1.93135	0.678434	1.40721	1.30575	1.17139	1.92464	1.46866	1.94273	1.59599	0.980305	0.867224	1.42248	1.16742	1.3197	1.56524	0.661114	0.756945	2.11774	1.31644	1.40429	1.19251	1.25561	1.24345
Q15139;F8WBA3;H0YHL5;F8VZ98	Q15139;F8WBA3	Serine/threonine-protein kinase D1;Serine/threonine-protein kinase D	PRKD1	anatomical structure formation involved in morphogenesis;angiogenesis;apoptosis;biological regulation;biosynthetic process;cell death;cell proliferation;cell surface receptor linked signaling pathway;cellular biosynthetic process;cellular component organization;cellular component organization at cellular level;cellular component organization or biogenesis;cellular component organization or biogen…	adenyl nucleotide binding;adenyl ribonucleotide binding;ATP binding;binding;catalytic activity;cation binding;identical protein binding;ion binding;kinase activity;metal ion binding;nucleotide binding;phosphotransferase activity, alcohol group as acceptor;protein binding;protein kinase activity;protein kinase C activity;protein serine/threonine kinase activity;purine nucleotide binding;purine rib…	cell cortex;cell junction;cell part;cell-cell junction;cytoplasm;cytoplasmic part;cytosol;Golgi apparatus;Golgi apparatus part;integral to membrane;integral to plasma membrane;intracellular membrane-bounded organelle;intracellular organelle;intracellular organelle part;intracellular part;intrinsic to membrane;intrinsic to plasma membrane;membrane;membrane part;membrane-bounded organelle;nucleus;o…	C1_1;PH;Pkinase	14	7	23.2	13	101.7	0	37.713	2467400000	NaN	-0.616121	NaN	NaN	1.39222	1.32627	0.524389	-0.839642	0.891422	1.55964	1.09302	1.25085	0.215733	1.02465	-0.744057	0.869267	-0.0836868	-0.20619	-2.26251	-0.767921	-0.894785	-0.229979	0.278128	-0.0279827	0.560856	0.317537	-0.103828	-2.2025	-0.234098	0.135408	0.0269699	-0.67404	0.726946	0.51148
B4DTS2;Q9BZL6;Q9BZL6-2;M0R2Z8;M0QZ82;M0QXC6;M0QZC2;C9JDA4;J3KNE8;E7ET86;Q8IVW4-2;Q92772;Q8IVW4;Q9NRP7-2;Q9NRP7	B4DTS2;Q9BZL6;Q9BZL6-2	Serine/threonine-protein kinase D;Serine/threonine-protein kinase D2	PRKD2	activation of immune response;anatomical structure development;anatomical structure formation involved in morphogenesis;anatomical structure morphogenesis;angiogenesis;antigen receptor-mediated signaling pathway;biological adhesion;biological regulation;brain development;cell adhesion;cell death;cell projection assembly;cell projection organization;cell surface receptor linked signaling pathway;c…	adenyl nucleotide binding;adenyl ribonucleotide binding;ATP binding;binding;catalytic activity;cation binding;cyclin-dependent protein kinase activity;ion binding;kinase activity;magnesium ion binding;metal ion binding;nucleotide binding;phosphotransferase activity, alcohol group as acceptor;protein binding;protein kinase activity;protein kinase C activity;protein serine/threonine kinase activity…	cell part;centrosome;cytoplasm;cytoplasmic part;cytoskeletal part;Golgi apparatus;intracellular membrane-bounded organelle;intracellular non-membrane-bounded organelle;intracellular organelle;intracellular organelle part;intracellular part;membrane;membrane-bounded organelle;microtubule organizing center;non-membrane-bounded organelle;nuclear part;nucleoplasm;nucleus;organelle;organelle part;plas…	C1_1;PH;Pkinase	25	20	50	42.8	97.742	0	323.31	21020000000	0.919416	1.05507	-0.633228	-0.191557	3.59015	4.02263	3.72592	3.1561	3.31707	3.43954	3.68441	3.74953	2.66383	3.38809	3.81722	3.40121	3.50254	3.56154	3.42885	3.24274	3.12525	2.73299	3.47085	3.44477	3.3196	3.55478	2.44927	2.86312	3.97567	3.8743	3.17028	3.44243	3.18427	3.57974
O94806;O94806-2;H0Y5M6;C9JKP8	O94806	Serine/threonine-protein kinase D3	PRKD3	activation of protein kinase activity;activation of protein kinase C activity by G-protein coupled receptor protein signaling pathway;biological regulation;cell surface receptor linked signaling pathway;cellular macromolecule metabolic process;cellular metabolic process;cellular process;cellular protein metabolic process;cellular response to stimulus;G-protein coupled receptor protein signaling p…	adenyl nucleotide binding;adenyl ribonucleotide binding;ATP binding;binding;catalytic activity;cation binding;ion binding;kinase activity;metal ion binding;nucleotide binding;phosphotransferase activity, alcohol group as acceptor;protein kinase activity;protein kinase C activity;protein serine/threonine kinase activity;purine nucleotide binding;purine ribonucleoside triphosphate binding;purine ri…	cell part;cytoplasm;intracellular organelle part;intracellular part;membrane;nuclear part;nucleoplasm;organelle part	C1_1;PH;Pkinase	19	14	28.8	22.2	100.47	0	157.79	6600200000	NaN	-1.03221	NaN	-4.4497	2.40555	2.75712	1.20408	1.40188	2.18052	2.4208	2.63673	2.59365	0.275692	0.740677	0.70043	0.926308	1.1349	0.768745	1.03054	0.931107	0.854839	-0.00558281	0.959822	1.33094	0.86264	1.02021	0.911842	0.260857	1.77319	1.42613	1.12811	0.765533	1.79397	1.92889
P78527;P78527-2	P78527;P78527-2	DNA-dependent protein kinase catalytic subunit	PRKDC	anatomical structure development;anatomical structure formation involved in morphogenesis;anatomical structure homeostasis;anterior/posterior pattern specification;B cell lineage commitment;biological regulation;brain development;cell activation;cell death;cell differentiation;cell fate commitment;cellular component organization;cellular component organization at cellular level;cellular component…	adenyl nucleotide binding;adenyl ribonucleotide binding;ATP binding;binding;catalytic activity;DNA binding;DNA-dependent protein kinase activity;kinase activity;nucleic acid binding;nucleotide binding;phosphotransferase activity, alcohol group as acceptor;protein binding;protein kinase activity;protein serine/threonine kinase activity;purine nucleotide binding;purine ribonucleoside triphosphate b…	cell part;cytoplasmic part;cytosol;DNA-dependent protein kinase-DNA ligase 4 complex;intracellular non-membrane-bounded organelle;intracellular organelle;intracellular organelle part;intracellular part;macromolecular complex;membrane;nonhomologous end joining complex;non-membrane-bounded organelle;nuclear part;nucleolus;nucleoplasm;nucleoplasm part;organelle;organelle part;protein complex;transcr…	FAT;FATC;NUC194;PI3_PI4_kinase	105	105	36.5	36.5	469.08	0	323.31	50627000000	3.51349	3.93371	2.86582	3.57604	4.82466	5.39025	4.74157	4.45869	4.8374	5.07832	4.9161	4.81478	4.58427	4.40538	4.9658	4.74015	4.60312	4.94274	4.56922	4.69812	4.96879	4.95146	4.35302	4.58414	4.44129	4.43487	4.00609	4.06517	4.90314	4.64072	4.40764	4.89804	4.83076	5.32014
Q13976;Q13976-2;A0A0A0MSB3;Q13976-3;B1ALS0;B7ZA25;Q13237-2;Q13237	Q13976;Q13976-2;A0A0A0MSB3	cGMP-dependent protein kinase 1	PRKG1	actin cytoskeleton organization;actin filament-based process;anatomical structure development;biological regulation;blood coagulation;cell migration;cell motility;cell projection organization;cellular component movement;cellular component organization;cellular component organization at cellular level;cellular component organization or biogenesis;cellular component organization or biogenesis at ce…	adenyl nucleotide binding;adenyl ribonucleotide binding;ATP binding;binding;calcium channel regulator activity;catalytic activity;cGMP binding;cGMP-dependent protein kinase activity;channel regulator activity;cyclic nucleotide binding;cyclic nucleotide-dependent protein kinase activity;GMP binding;guanyl nucleotide binding;guanyl ribonucleotide binding;kinase activity;nucleotide binding;phosphotr…	apical plasma membrane;cell part;cytoplasm;cytoplasmic part;cytosol;Golgi apparatus;intracellular membrane-bounded organelle;intracellular organelle;intracellular organelle part;intracellular part;membrane;membrane part;membrane-bounded organelle;nuclear membrane;nuclear part;organelle;organelle membrane;organelle part;plasma membrane;plasma membrane part	cNMP_binding;Pkinase	36	36	62.4	62.4	76.364	0	323.31	21563000000	0.85025	1.41388	0.0184841	1.15285	3.68119	3.82854	3.36091	2.98194	3.6547	3.81394	3.3973	3.60441	2.64665	3.02292	3.81029	3.61253	2.79593	2.60294	3.2347	3.36929	3.17199	2.41024	3.24346	3.24946	3.68716	3.6136	3.22238	3.54185	3.69668	3.46187	3.23416	3.54645	3.71314	3.98941
P51817;O43930;C9J8E1;P49137-2;Q16644;P49137	P51817	cAMP-dependent protein kinase catalytic subunit PRKX	PRKX	3'-UTR-mediated mRNA stabilization;activation of immune response;activation of innate immune response;activation of MAPK activity;anatomical structure development;anatomical structure formation involved in morphogenesis;anatomical structure morphogenesis;angiogenesis;arachidonic acid metabolic process;biological adhesion;biological regulation;carboxylic acid metabolic process;cell adhesion;cell c…	adenyl nucleotide binding;adenyl ribonucleotide binding;ATP binding;binding;calcium-dependent protein kinase activity;calcium-dependent protein serine/threonine kinase activity;calmodulin binding;calmodulin-dependent protein kinase activity;cAMP-dependent protein kinase activity;catalytic activity;cyclic nucleotide-dependent protein kinase activity;enzyme binding;kinase activity;kinase binding;MA…	cell part;centrosome;cytoplasm;cytoplasmic part;cytoskeletal part;cytosol;extracellular membrane-bounded organelle;extracellular organelle;extracellular region part;extracellular vesicular exosome;intracellular membrane-bounded organelle;intracellular non-membrane-bounded organelle;intracellular organelle;intracellular organelle part;intracellular part;membrane;membrane-bounded organelle;membrane…	Pkinase	5	4	29.6	27.4	40.895	0	18.431	371520000	NaN	NaN	NaN	NaN	NaN	-0.822304	-1.60028	-3.28442	NaN	-1.56353	-2.81239	-2.00176	-2.16205	-1.19551	-1.25146	-1.69803	-3.4255	-1.79923	-1.42939	-1.61631	-3.20098	-3.63356	NaN	-3.32315	-1.87651	-1.64169	-2.89697	-1.85076	-2.1841	-1.75146	-1.91952	-3.29855	-0.930634	NaN
Q13523;H0YDJ3	Q13523;H0YDJ3	Serine/threonine-protein kinase PRP4 homolog	PRPF4B	cellular macromolecule metabolic process;cellular metabolic process;cellular nitrogen compound metabolic process;cellular process;cellular protein metabolic process;macromolecule metabolic process;macromolecule modification;metabolic process;mRNA metabolic process;mRNA processing;nitrogen compound metabolic process;nuclear mRNA splicing, via spliceosome;nucleic acid metabolic process;nucleobase-c…	adenyl nucleotide binding;adenyl ribonucleotide binding;ATP binding;binding;catalytic activity;kinase activity;nucleotide binding;phosphotransferase activity, alcohol group as acceptor;protein kinase activity;protein serine/threonine kinase activity;purine nucleotide binding;purine ribonucleoside triphosphate binding;purine ribonucleotide binding;ribonucleotide binding;transferase activity;transf…	catalytic step 2 spliceosome;cell part;chromosome;intracellular non-membrane-bounded organelle;intracellular organelle;intracellular organelle part;intracellular part;macromolecular complex;non-membrane-bounded organelle;nuclear part;nucleoplasm;organelle;organelle part;ribonucleoprotein complex;spliceosomal complex	Pkinase	8	8	12.6	12.6	116.99	0	38.532	466210000	-1.00294	-3.10372	-0.254568	-1.13035	-2.08042	-1.32194	NaN	-3.45594	-1.8626	-2.08064	0.669617	0.422243	NaN	NaN	NaN	NaN	NaN	NaN	-3.2297	NaN	NaN	NaN	NaN	NaN	-3.78112	-2.4446	NaN	-3.81429	NaN	NaN	NaN	NaN	-1.92402	-1.62258
E7ESA6	E7ESA6	Protein-tyrosine kinase 2	PTK2	biological regulation;cellular component assembly;cellular component assembly at cellular level;cellular component organization;cellular component organization at cellular level;cellular component organization or biogenesis;cellular component organization or biogenesis at cellular level;cellular macromolecular complex assembly;cellular macromolecular complex subunit organization;cellular process;…	adenyl nucleotide binding;adenyl ribonucleotide binding;ATP binding;binding;catalytic activity;kinase activity;molecular transducer activity;nucleotide binding;phosphotransferase activity, alcohol group as acceptor;protein kinase activity;protein tyrosine kinase activity;purine nucleotide binding;purine ribonucleoside triphosphate binding;purine ribonucleotide binding;ribonucleotide binding;signa…	adherens junction;anchoring junction;cell junction;cell part;cell-substrate adherens junction;cell-substrate junction;cytoplasm;cytoskeleton;focal adhesion;intracellular non-membrane-bounded organelle;intracellular organelle;intracellular part;non-membrane-bounded organelle;organelle	FERM_M;Focal_AT;Pkinase_Tyr	144	1	90.7	1.1	124.08	0	323.31	2629100000000	9.67251	9.72861	9.05245	9.75873	10.5244	10.5896	10.6464	10.4465	10.5652	10.7133	10.6184	10.568	10.2378	10.4832	10.5241	10.502	10.4526	10.3902	10.6862	10.626	10.0536	9.60193	10.4384	10.4931	10.5067	10.6763	9.96521	10.2113	10.639	10.5252	10.4187	10.5779	10.3305	10.5765
Q14289;Q14289-2;E9PBI4;C9JHV9;E5RJ77;H0YB74;E5RK84;E5RHL2	Q14289;Q14289-2	Protein-tyrosine kinase 2-beta	PTK2B	actin cytoskeleton organization;actin filament bundle assembly;actin filament organization;actin filament-based process;activation of Janus kinase activity;activation of protein kinase activity;anatomical structure formation involved in morphogenesis;anatomical structure homeostasis;angiogenesis;apoptosis;B cell activation;B cell activation involved in immune response;B cell differentiation;biolo…	adenyl nucleotide binding;adenyl ribonucleotide binding;ATP binding;binding;calmodulin-dependent protein kinase activity;catalytic activity;glutamate receptor activity;ionotropic glutamate receptor activity;kinase activity;molecular transducer activity;N-methyl-D-aspartate selective glutamate receptor activity;non-membrane spanning protein tyrosine kinase activity;nucleotide binding;phosphotransf…	adherens junction;anchoring junction;axon;cell body;cell cortex;cell junction;cell part;cell projection;cell projection part;cell-substrate adherens junction;cell-substrate junction;cytoplasm;cytoplasmic part;cytoskeletal part;cytoskeleton;cytosol;dendrite;extrinsic to internal side of plasma membrane;extrinsic to membrane;extrinsic to plasma membrane;focal adhesion;growth cone;intracellular memb…	FERM_M;Focal_AT;Pkinase_Tyr	60	59	74.8	74.8	115.87	0	323.31	37458000000	2.84108	3.29268	2.26006	2.88898	4.37763	4.72549	4.44175	4.42707	4.11982	4.60287	4.11239	4.18903	4.37417	4.82616	4.69539	4.9149	4.33143	4.66095	4.40502	4.32659	4.15811	3.63852	4.09627	4.29054	4.34113	4.41653	4.00957	4.59005	4.70009	4.96415	4.2713	4.31741	4.13788	4.68776
Q13882;Q13882-2	Q13882	Protein-tyrosine kinase 6	PTK6	actin cytoskeleton organization;actin filament-based process;biological regulation;cell communication;cell differentiation;cell migration;cell motility;cell surface receptor linked signaling pathway;cellular component movement;cellular component organization;cellular component organization at cellular level;cellular component organization or biogenesis;cellular component organization or biogenesi…	adenyl nucleotide binding;adenyl ribonucleotide binding;ATP binding;binding;catalytic activity;identical protein binding;kinase activity;non-membrane spanning protein tyrosine kinase activity;nucleotide binding;phosphotransferase activity, alcohol group as acceptor;protein binding;protein kinase activity;protein tyrosine kinase activity;purine nucleotide binding;purine ribonucleoside triphosphate…	cell part;cell projection;cytoplasm;extrinsic to internal side of plasma membrane;extrinsic to membrane;extrinsic to plasma membrane;intracellular membrane-bounded organelle;intracellular organelle;intracellular organelle part;intracellular part;membrane part;membrane-bounded organelle;nuclear part;nucleoplasm;nucleus;organelle;organelle part;plasma membrane part;ruffle	Pkinase_Tyr;SH2;SH3_9	32	31	78.3	76.5	51.834	0	245.85	12745000000	1.79396	2.27127	1.39443	1.80277	3.17893	3.27133	3.06579	2.57101	2.79581	3.21429	2.71205	3.02978	2.3757	2.70879	2.51188	2.78356	2.83809	2.50874	3.26063	2.89883	2.15741	1.98808	2.57917	2.62087	2.88711	2.89046	2.15068	1.64002	3.6679	2.85083	2.59694	3.07069	2.77602	3.38982
P07949-2;P07949;Q9BTX6;C9JYL6	P07949-2;P07949	Proto-oncogene tyrosine-protein kinase receptor Ret;Soluble RET kinase fragment;Extracellular cell-membrane anchored RET cadherin 120 kDa fragment	RET	activation of caspase activity;ameboidal cell migration;anatomical structure development;anatomical structure formation involved in morphogenesis;anatomical structure maturation;anatomical structure morphogenesis;biological adhesion;biological regulation;cell adhesion;cell communication;cell maturation;cell migration;cell motility;cell surface receptor linked signaling pathway;cell-cell adhesion;…	adenyl nucleotide binding;adenyl ribonucleotide binding;ATP binding;binding;calcium ion binding;catalytic activity;cation binding;ion binding;kinase activity;metal ion binding;molecular transducer activity;nucleotide binding;phosphotransferase activity, alcohol group as acceptor;protein kinase activity;protein tyrosine kinase activity;purine nucleotide binding;purine ribonucleoside triphosphate b…	cell part;cytoplasm;cytoplasmic part;endosomal part;endosome membrane;integral to membrane;integral to plasma membrane;intracellular membrane-bounded organelle;intracellular organelle;intracellular organelle part;intracellular part;intrinsic to membrane;intrinsic to plasma membrane;macromolecular complex;membrane;membrane part;membrane raft;membrane-bounded organelle;organelle;organelle membrane;…	Cadherin;Pkinase_Tyr	11	11	20.1	20.1	119.85	0	97.732	3978800000	0.631283	0.776945	-0.141092	0.292751	0.124218	0.175823	1.96179	1.55531	0.962341	1.17014	0.78941	0.981535	1.28759	1.41953	1.47895	1.47054	0.39595	1.42845	1.64137	1.88288	-0.67181	0.365362	1.17316	1.46712	1.59983	1.5519	0.144499	1.22086	2.04382	1.77103	1.54232	1.5847	-0.314733	0.639988
Q9BVS4;Q9BVS4-2;H0Y919	Q9BVS4;Q9BVS4-2	Serine/threonine-protein kinase RIO2	RIOK2		adenyl nucleotide binding;adenyl ribonucleotide binding;ATP binding;binding;catalytic activity;kinase activity;nucleotide binding;phosphotransferase activity, alcohol group as acceptor;protein kinase activity;protein serine/threonine kinase activity;purine nucleotide binding;purine ribonucleoside triphosphate binding;purine ribonucleotide binding;ribonucleotide binding;transferase activity;transf…		RIO1;Rio2_N	13	13	32.6	32.6	63.282	0	232.15	4803300000	0.513872	0.801523	-0.905211	0.298426	0.956423	0.94207	1.13677	1.21322	1.13522	1.12344	1.41602	1.55442	1.56408	1.89081	1.74791	1.04168	1.23294	0.609383	1.00773	1.08837	0.956923	0.273609	1.17987	1.42613	1.41796	1.69947	1.37946	1.52686	1.57507	1.28543	1.31062	1.49977	1.27977	1.97079
Q13546;Q13546-2	Q13546;Q13546-2	Receptor-interacting serine/threonine-protein kinase 1	RIPK1	activation of caspase activity;activation of immune response;activation of innate immune response;activation of JUN kinase activity;activation of MAPK activity;apoptosis;biological regulation;catabolic process;cell death;cell surface receptor linked signaling pathway;cellular catabolic process;cellular component assembly;cellular component organization;cellular component organization or biogenesi…	adenyl nucleotide binding;adenyl ribonucleotide binding;ATP binding;binding;catalytic activity;cytokine receptor binding;death domain binding;death receptor binding;enzyme binding;identical protein binding;kinase activity;nucleotide binding;phosphotransferase activity, alcohol group as acceptor;protein binding;protein complex binding;protein domain specific binding;protein kinase activity;protein…	cell part;cytoplasm;cytoplasmic part;cytosol;death-inducing signaling complex;intracellular membrane-bounded organelle;intracellular organelle;intracellular part;macromolecular complex;membrane part;membrane raft;membrane-bounded organelle;mitochondrion;organelle;plasma membrane part;protein complex;receptor complex	Death;Pkinase;RHIM	28	28	46.5	46.5	75.93	0	323.31	17345000000	0.65436	1.32593	0.386437	0.99604	-1.6032	0.672354	4.68169	4.38991	-3.57237	0.0531693	-0.323584	0.140213	4.70159	4.85037	4.62803	4.7267	4.80867	4.56555	2.59636	2.44505	1.16737	1.038	2.56572	3.26263	4.6947	4.76597	3.89628	4.42861	4.38061	4.42885	4.35867	4.69987	-0.559218	-0.032259
O43353;O43353-2;E7ERW9;E5RGK6	O43353;O43353-2	Receptor-interacting serine/threonine-protein kinase 2	RIPK2	activation of immune response;activation of innate immune response;activation of MAPK activity;adaptive immune response;antigen receptor-mediated signaling pathway;apoptosis;biological regulation;cell activation;cell death;cell proliferation;cell surface receptor linked signaling pathway;cellular macromolecule metabolic process;cellular metabolic process;cellular process;cellular protein metaboli…	adenyl nucleotide binding;adenyl ribonucleotide binding;ATP binding;binding;CARD domain binding;catalytic activity;identical protein binding;kinase activity;LIM domain binding;molecular transducer activity;non-membrane spanning protein tyrosine kinase activity;nucleotide binding;phosphotransferase activity, alcohol group as acceptor;protein binding;protein dimerization activity;protein domain spe…	cell part;cytoplasm;cytoplasmic part;cytoskeleton;cytosol;intracellular non-membrane-bounded organelle;intracellular organelle;intracellular part;macromolecular complex;non-membrane-bounded organelle;organelle;protein complex;vesicle	CARD;Pkinase	47	46	92.8	91.3	61.194	0	323.31	54463000000	3.28256	3.23702	2.32677	3.16674	5.28696	5.63406	5.07884	4.67487	5.30318	5.45886	5.4	5.40729	3.79119	4.60989	4.78718	4.99631	4.17747	4.28447	3.31492	3.18624	1.88233	1.5917	3.09791	3.40791	5.03492	5.1348	4.62095	4.76302	4.99692	4.8687	3.99784	4.49304	2.84769	2.99225
Q15418;E9PGT3;Q15418-4;Q15418-3;Q5SVM6;E9PMM7;Q5SVM7	Q15418;E9PGT3;Q15418-4;Q15418-3	Ribosomal protein S6 kinase alpha-1;Ribosomal protein S6 kinase	RPS6KA1	activation of immune response;activation of innate immune response;axon guidance;biological regulation;cell communication;cell cycle;cell proliferation;cell surface receptor linked signaling pathway;cell-cell signaling;cellular macromolecule metabolic process;cellular metabolic process;cellular process;cellular protein metabolic process;cellular response to stimulus;cellular response to stress;ch…	adenyl nucleotide binding;adenyl ribonucleotide binding;ATP binding;binding;caspase inhibitor activity;caspase regulator activity;catalytic activity;cation binding;cysteine-type endopeptidase inhibitor activity;endopeptidase inhibitor activity;endopeptidase regulator activity;enzyme inhibitor activity;enzyme regulator activity;ion binding;kinase activity;magnesium ion binding;metal ion binding;nu…	cell part;cytoplasm;cytoplasmic part;cytoskeletal part;cytosol;intracellular membrane-bounded organelle;intracellular non-membrane-bounded organelle;intracellular organelle;intracellular organelle part;intracellular part;membrane-bounded organelle;non-membrane-bounded organelle;nuclear part;nucleoplasm;nucleus;organelle;organelle part;spindle	Pkinase;Pkinase_C	86	2	90.5	5.6	82.722	0	323.31	730160000000	7.16128	7.36896	6.75941	7.32966	8.63231	8.85524	8.8557	8.85078	8.33666	8.51605	8.33455	8.4932	8.59978	8.77961	9.15673	8.95518	8.83076	8.7773	8.9061	8.92142	8.54129	8.02619	8.81104	8.8394	8.89208	8.95066	8.37792	8.48794	8.9339	8.98318	8.56518	8.83575	8.44853	8.54453
P51812;B1AXG1;D6R910;D6RHW7;D6RA62	P51812	Ribosomal protein S6 kinase alpha-3	RPS6KA3	activation of immune response;activation of innate immune response;anatomical structure development;axon guidance;biological regulation;cell communication;cell cycle;cell surface receptor linked signaling pathway;cell-cell signaling;cellular macromolecule metabolic process;cellular metabolic process;cellular process;cellular protein metabolic process;cellular response to stimulus;cellular respons…	adenyl nucleotide binding;adenyl ribonucleotide binding;ATP binding;binding;caspase inhibitor activity;caspase regulator activity;catalytic activity;cation binding;cysteine-type endopeptidase inhibitor activity;endopeptidase inhibitor activity;endopeptidase regulator activity;enzyme inhibitor activity;enzyme regulator activity;ion binding;kinase activity;magnesium ion binding;metal ion binding;nu…	cell part;cytoplasm;cytoplasmic part;cytosol;intracellular membrane-bounded organelle;intracellular organelle;intracellular organelle part;intracellular part;membrane-bounded organelle;nuclear part;nucleoplasm;nucleus;organelle;organelle part	Pkinase;Pkinase_C	79	45	89.9	64.3	83.735	0	323.31	189540000000	5.21692	5.46936	4.747	5.35294	6.70682	6.92373	7.06392	6.74628	6.14939	6.42489	6.48756	6.52711	6.29159	6.82105	7.0834	6.99072	6.7509	6.94072	6.94464	6.84954	6.4489	6.20755	6.79368	6.68078	6.58079	6.90695	6.11986	6.45275	7.03232	7.06723	6.37384	6.76189	6.36526	6.6674
O75676;E9PJN1;O75676-2;A0A0A6YYC0;E9PKU3	O75676;E9PJN1;O75676-2;A0A0A6YYC0	Ribosomal protein S6 kinase alpha-4;Ribosomal protein S6 kinase	RPS6KA4	axon guidance;biological regulation;cell surface receptor linked signaling pathway;cellular component organization;cellular component organization at cellular level;cellular component organization or biogenesis;cellular component organization or biogenesis at cellular level;cellular macromolecule metabolic process;cellular metabolic process;cellular process;cellular protein metabolic process;cell…	adenyl nucleotide binding;adenyl ribonucleotide binding;ATP binding;binding;catalytic activity;cation binding;enzyme binding;histone kinase activity;histone kinase activity (H3-S10 specific);histone serine kinase activity;ion binding;kinase activity;kinase binding;magnesium ion binding;metal ion binding;mitogen-activated protein kinase binding;mitogen-activated protein kinase p38 binding;nucleoti…	cell part;cytoplasm;intracellular membrane-bounded organelle;intracellular organelle;intracellular organelle part;intracellular part;membrane-bounded organelle;nuclear part;nucleoplasm;nucleus;organelle;organelle part	Pkinase;Pkinase_C	41	39	67	64.8	85.605	0	323.31	30307000000	2.53424	2.76976	1.51129	2.11826	4.42435	4.43152	3.82289	3.81097	4.10984	4.16609	4.19627	4.06943	3.65824	3.88807	4.26793	4.08526	3.60132	3.7226	4.24644	3.94575	3.13921	2.88148	4.1104	4.01679	3.65954	3.92474	2.90869	3.4593	3.98142	3.95526	3.75347	3.80566	3.96542	4.3032
A0A0A0MQV2;O75582;O75582-3;O75582-2;G3V2D1	A0A0A0MQV2;O75582;O75582-3;O75582-2	Ribosomal protein S6 kinase alpha-5	RPS6KA5	activation of immune response;activation of innate immune response;axon guidance;biological regulation;cell surface receptor linked signaling pathway;cellular component organization;cellular component organization at cellular level;cellular component organization or biogenesis;cellular component organization or biogenesis at cellular level;cellular macromolecule metabolic process;cellular metabol…	adenyl nucleotide binding;adenyl ribonucleotide binding;ATP binding;binding;catalytic activity;cation binding;histone kinase activity;histone kinase activity (H3-S10 specific);histone serine kinase activity;ion binding;kinase activity;magnesium ion binding;metal ion binding;nucleotide binding;phosphotransferase activity, alcohol group as acceptor;protein kinase activity;protein serine/threonine k…	cell part;cytoplasm;intracellular membrane-bounded organelle;intracellular organelle;intracellular organelle part;intracellular part;membrane-bounded organelle;nuclear part;nucleoplasm;nucleus;organelle;organelle part	Pkinase;Pkinase_C	10	8	20.2	18.1	90.507	0	83.165	1744400000	-0.256081	-0.356445	-1.41194	-0.873882	0.447996	0.345367	-0.0590477	0.113186	-0.336241	0.108908	-0.397284	0.104725	-0.405605	0.0357189	0.0552292	-0.112627	-0.30084	-0.258964	0.330027	-0.3997	0.00717354	-0.774464	-0.750297	-0.472609	-0.767033	0.159365	-0.237879	-0.438705	0.545351	0.140593	-0.935741	-0.244225	-0.087883	0.153383
Q96BR1-2;Q96BR1;E5RJV7;E5RK28;E5RHX2;E5RHY6;E5RHR8	Q96BR1-2;Q96BR1;E5RJV7;E5RK28;E5RHX2;E5RHY6	Serine/threonine-protein kinase Sgk3	SGK3	biological regulation;cellular macromolecule metabolic process;cellular metabolic process;cellular process;cellular protein metabolic process;establishment of localization;ion transmembrane transport;ion transport;macromolecule metabolic process;macromolecule modification;metabolic process;phosphate-containing compound metabolic process;phosphorus metabolic process;phosphorylation;primary metabol…	adenyl nucleotide binding;adenyl ribonucleotide binding;ATP binding;binding;calcium channel regulator activity;catalytic activity;channel regulator activity;chloride channel regulator activity;kinase activity;lipid binding;nucleotide binding;phosphatidylinositol binding;phospholipid binding;phosphotransferase activity, alcohol group as acceptor;potassium channel regulator activity;protein kinase …	cell part;cytoplasmic membrane-bounded vesicle;cytoplasmic part;cytoplasmic vesicle;cytosol;early endosome;endosome;intracellular membrane-bounded organelle;intracellular organelle;intracellular part;membrane-bounded organelle;membrane-bounded vesicle;organelle;recycling endosome;vesicle	Pkinase;Pkinase_C;PX	6	6	21.1	21.1	53.305	0.0019206	5.4006	1031100000	-2.62103	-1.62476	NaN	NaN	-1.39151	-0.87742	-4.14181	-2.81955	-1.31347	-0.675676	-0.497812	-0.578545	NaN	-2.4513	NaN	-2.44587	NaN	-4.44194	NaN	NaN	NaN	-3.25402	NaN	NaN	-2.06355	NaN	-2.21773	-1.92601	-1.29364	NaN	-2.8527	NaN	-0.269093	0.222153
Q9H0K1	Q9H0K1	Serine/threonine-protein kinase SIK2	SIK2	biological regulation;cell surface receptor linked signaling pathway;cellular macromolecule metabolic process;cellular metabolic process;cellular process;cellular protein metabolic process;cellular response to chemical stimulus;cellular response to endogenous stimulus;cellular response to hormone stimulus;cellular response to insulin stimulus;cellular response to organic substance;cellular respon…	adenyl nucleotide binding;adenyl ribonucleotide binding;ATP binding;binding;catalytic activity;cation binding;ion binding;kinase activity;magnesium ion binding;metal ion binding;nucleotide binding;phosphotransferase activity, alcohol group as acceptor;protein kinase activity;protein serine/threonine kinase activity;purine nucleotide binding;purine ribonucleoside triphosphate binding;purine ribonu…	cell part;cytoplasm;intracellular membrane-bounded organelle;intracellular organelle;intracellular part;membrane-bounded organelle;nucleus;organelle	Pkinase	25	24	40	39.1	103.91	0	222.35	10086000000	0.358297	0.975683	0.0183201	-0.281668	3.00765	3.28313	2.66308	2.516	2.87127	2.9882	2.95948	3.24799	2.19767	2.33676	2.89967	2.51576	2.12866	2.39997	2.32112	2.21867	1.90156	1.2028	2.51186	2.52051	2.66679	2.81073	2.40934	2.40698	2.41326	2.35108	2.63226	2.63843	0.260452	2.32448
Q9H2G2;Q9H2G2-2	Q9H2G2;Q9H2G2-2	STE20-like serine/threonine-protein kinase	SLK	activation of protein kinase activity;apoptosis;biological regulation;cell death;cellular macromolecule metabolic process;cellular metabolic process;cellular process;cellular protein metabolic process;cellular response to stimulus;cellular response to stress;death;intracellular protein kinase cascade;intracellular signal transduction;macromolecule metabolic process;macromolecule modification;meta…	adenyl nucleotide binding;adenyl ribonucleotide binding;ATP binding;binding;catalytic activity;identical protein binding;kinase activity;nucleotide binding;phosphotransferase activity, alcohol group as acceptor;protein binding;protein dimerization activity;protein homodimerization activity;protein kinase activity;protein serine/threonine kinase activity;purine nucleotide binding;purine ribonucleo…	cell part;cytoplasm;extracellular membrane-bounded organelle;extracellular organelle;extracellular region part;extracellular vesicular exosome;intracellular part;membrane-bounded organelle;membrane-bounded vesicle;organelle;vesicle	Pkinase;PKK	89	87	73.8	72.2	142.69	0	323.31	158650000000	4.86145	5.02873	4.97643	5.41173	6.81714	7.07918	6.13855	6.22693	6.61283	6.88641	6.65749	6.75286	6.16338	6.29528	6.64915	6.2899	6.1811	5.93651	6.04767	5.60062	5.55134	4.78905	6.24864	5.98297	6.34945	6.4656	6.15422	6.17482	6.19219	6.39114	5.97245	5.66774	5.34403	5.78364
P12931;P12931-2	P12931;P12931-2	Proto-oncogene tyrosine-protein kinase Src	SRC	actin cytoskeleton organization;actin filament bundle assembly;actin filament organization;actin filament-based process;activation of immune response;activation of innate immune response;activation of protein kinase activity;activation of protein kinase B activity;adherens junction organization;anatomical structure development;anatomical structure homeostasis;anatomical structure morphogenesis;ax…	adenyl nucleotide binding;adenyl ribonucleotide binding;ATP binding;binding;binding, bridging;catalytic activity;cation binding;enzyme binding;ephrin receptor binding;growth factor receptor binding;heme binding;hormone receptor binding;integrin binding;ion binding;ion channel binding;iron ion binding;kinase activity;metal ion binding;non-membrane spanning protein tyrosine kinase activity;nucleoti…	actin filament;caveola;cell part;cell projection;cell projection membrane;cell projection part;cytoplasm;cytoplasmic part;cytoskeletal part;cytosol;endosome;extracellular membrane-bounded organelle;extracellular organelle;extracellular region part;extracellular vesicular exosome;extrinsic to internal side of plasma membrane;extrinsic to membrane;extrinsic to plasma membrane;intracellular membrane…	Pkinase_Tyr;SH2;SH3_1	68	50	84.7	76.5	59.834	0	323.31	833710000000	7.7097	7.81877	7.23228	7.86608	9.26076	9.34384	8.80971	8.56634	9.09324	9.26701	9.13311	9.20225	8.2081	8.41412	8.66086	8.61774	8.4273	8.30022	8.66152	8.48179	7.67021	7.09533	8.6389	8.56784	8.6662	8.67109	8.31822	8.34483	8.6812	8.54484	8.54306	8.6143	8.37798	8.58133
H3BLV9;Q5R363;Q96SB4-4;Q96SB4;Q96SB4-3;A8MPP7;A8MPY5;E7ETV6;Q9UPE1-2;Q9UPE1-3;Q9UPE1-4;Q9UPE1;H7C2I2;D6RBF8;D6RBM8	H3BLV9;Q5R363;Q96SB4-4;Q96SB4;Q96SB4-3	SRSF protein kinase 1	SRPK1	anatomical structure development;biological regulation;cell differentiation;cellular component organization;cellular component organization at cellular level;cellular component organization or biogenesis;cellular component organization or biogenesis at cellular level;cellular developmental process;cellular macromolecule metabolic process;cellular metabolic process;cellular nitrogen compound metab…	adenyl nucleotide binding;adenyl ribonucleotide binding;ATP binding;binding;catalytic activity;cation binding;ion binding;kinase activity;magnesium ion binding;metal ion binding;nucleotide binding;phosphotransferase activity, alcohol group as acceptor;protein kinase activity;protein serine/threonine kinase activity;purine nucleotide binding;purine ribonucleoside triphosphate binding;purine ribonu…	cell part;cytoplasm;cytoplasmic part;endoplasmic reticulum;intracellular membrane-bounded organelle;intracellular organelle;intracellular organelle part;intracellular part;membrane;membrane-bounded organelle;nuclear matrix;nuclear part;nucleoplasm;nucleus;organelle;organelle part;plasma membrane	Pkinase	6	4	11.3	8.2	76.039	0	17.243	646030000	NaN	-3.04232	NaN	NaN	-0.130753	-0.153593	-2.95237	NaN	-0.854366	-0.154175	-0.507628	0.0554867	NaN	-2.3532	NaN	-2.70585	-1.84206	-2.62065	-1.06861	-1.50831	-2.01567	NaN	NaN	-2.15788	NaN	-1.15454	NaN	NaN	NaN	-2.51147	-1.2416	-1.22862	-0.785118	-0.297014
H7C521;H7C5L6;P78362;P78362-2;F8WBW4	H7C521;H7C5L6;P78362;P78362-2;F8WBW4	SRSF protein kinase 2;SRSF protein kinase 2 N-terminal;SRSF protein kinase 2 C-terminal	SRPK2	anatomical structure formation involved in morphogenesis;angiogenesis;biological regulation;cell differentiation;cellular component assembly;cellular component assembly at cellular level;cellular component organization;cellular component organization at cellular level;cellular component organization or biogenesis;cellular component organization or biogenesis at cellular level;cellular development…	14-3-3 protein binding;adenyl nucleotide binding;adenyl ribonucleotide binding;ATP binding;binding;catalytic activity;cation binding;ion binding;kinase activity;magnesium ion binding;metal ion binding;nucleotide binding;phosphotransferase activity, alcohol group as acceptor;protein binding;protein kinase activity;protein serine/threonine kinase activity;purine nucleotide binding;purine ribonucleo…	cell part;cytoplasm;intracellular membrane-bounded organelle;intracellular non-membrane-bounded organelle;intracellular organelle;intracellular organelle part;intracellular part;membrane-bounded organelle;non-membrane-bounded organelle;nuclear part;nucleolus;nucleoplasm;nucleus;organelle;organelle part	Pkinase	4	2	28.9	18.6	23.523	0.0018927	4.9845	63631000	NaN	NaN	NaN	NaN	-3.85675	NaN	-3.95072	NaN	NaN	NaN	-3.30672	-3.1344	NaN	NaN	-4.46722	NaN	-4.31186	-4.22576	NaN	-4.33647	-4.51739	-4.92581	-4.60248	-4.41666	-5.17993	-4.1811	-4.1626	NaN	-3.82599	-4.33097	NaN	-4.88935	-2.61416	NaN
O94804	O94804	Serine/threonine-protein kinase 10	STK10	activation of protein kinase activity;biological adhesion;biological regulation;cell adhesion;cell cycle;cell-cell adhesion;cellular macromolecule metabolic process;cellular metabolic process;cellular process;cellular protein metabolic process;cellular response to stimulus;cellular response to stress;homotypic cell-cell adhesion;intracellular protein kinase cascade;intracellular signal transducti…	adenyl nucleotide binding;adenyl ribonucleotide binding;ATP binding;binding;catalytic activity;identical protein binding;kinase activity;molecular transducer activity;nucleotide binding;phosphotransferase activity, alcohol group as acceptor;polo kinase kinase activity;protein binding;protein dimerization activity;protein homodimerization activity;protein kinase activity;protein serine/threonine k…	cell part;cytoplasm;extracellular membrane-bounded organelle;extracellular organelle;extracellular region part;extracellular vesicular exosome;intracellular part;membrane;membrane-bounded organelle;membrane-bounded vesicle;organelle;plasma membrane;vesicle	Pkinase;PKK	56	43	53.2	44.2	112.13	0	323.31	51464000000	3.70922	4.06925	3.26326	3.87981	5.02018	5.29314	4.96347	4.84899	4.917	4.95703	4.98648	4.84067	4.48552	5.03259	4.99386	4.92767	5.23573	4.83955	4.68472	4.71558	3.81563	3.18037	4.67681	4.65353	4.90369	5.05276	4.36348	4.56136	4.97469	4.91239	4.67915	4.90462	4.05049	4.19658
K7EP59;Q15831-2;Q15831;K7EQN8;K7EMR0	K7EP59;Q15831-2;Q15831;K7EQN8	Serine/threonine-protein kinase STK11	STK11	activation of immune response;activation of protein kinase activity;anatomical structure development;anatomical structure homeostasis;anatomical structure morphogenesis;anoikis;antigen receptor-mediated signaling pathway;apoptosis;autophagy;axonogenesis;biological regulation;canonical Wnt receptor signaling pathway;carbohydrate homeostasis;catabolic process;cell cycle arrest;cell cycle process;ce…	adenyl nucleotide binding;adenyl ribonucleotide binding;ATP binding;binding;catalytic activity;cation binding;enzyme activator activity;enzyme regulator activity;ion binding;kinase activator activity;kinase activity;kinase regulator activity;magnesium ion binding;metal ion binding;nucleotide binding;p53 binding;phosphotransferase activity, alcohol group as acceptor;protein binding;protein kinase …	cell part;cytoplasm;cytoplasmic part;cytosol;extracellular membrane-bounded organelle;extracellular organelle;extracellular region part;extracellular vesicular exosome;intracellular membrane-bounded organelle;intracellular organelle;intracellular part;membrane;membrane-bounded organelle;membrane-bounded vesicle;mitochondrion;nucleus;organelle;vesicle	Pkinase	6	6	27.3	27.3	48.455	0	14.318	481210000	-5.10037	NaN	NaN	NaN	-2.65909	-0.782732	-2.64648	NaN	-0.829376	-1.39956	-2.57861	-1.35121	-1.78225	NaN	NaN	NaN	-3.02314	-2.25331	-3.23261	-3.55514	NaN	-4.69468	-2.30667	-2.28696	NaN	-3.09385	-4.06755	NaN	-2.49573	NaN	-2.99598	-2.08192	-3.66887	-0.346394
O75716;B8ZZN3;B8ZZI5;B4DPS1	O75716;B8ZZN3;B8ZZI5	Serine/threonine-protein kinase 16	STK16	biological regulation;cellular macromolecule metabolic process;cellular metabolic process;cellular process;cellular protein metabolic process;cellular response to chemical stimulus;cellular response to endogenous stimulus;cellular response to growth factor stimulus;cellular response to organic substance;cellular response to stimulus;cellular response to transforming growth factor beta stimulus;ma…	adenyl nucleotide binding;adenyl ribonucleotide binding;ATP binding;binding;catalytic activity;kinase activity;non-membrane spanning protein tyrosine kinase activity;nucleic acid binding transcription factor activity;nucleotide binding;phosphotransferase activity, alcohol group as acceptor;protein kinase activity;protein serine/threonine kinase activity;protein tyrosine kinase activity;purine nuc…	cell part;cytoplasm;cytoplasmic membrane-bounded vesicle;cytoplasmic part;cytoplasmic vesicle;Golgi apparatus part;Golgi-associated vesicle;intracellular membrane-bounded organelle;intracellular organelle;intracellular organelle part;intracellular part;membrane;membrane-bounded organelle;membrane-bounded vesicle;organelle;organelle part;perinuclear region of cytoplasm;vesicle	Pkinase	7	7	47.5	47.5	34.656	0	108.3	2196400000	-0.832073	-0.889498	-1.89949	-0.791134	0.499802	0.832264	-2.69194	-1.73243	-0.288174	-2.11271	1.16304	0.684061	NaN	-0.542429	-2.804	-0.306717	-3.23295	-0.950241	-2.82654	NaN	NaN	NaN	0.917561	-4.02919	NaN	-2.53167	-2.25908	-0.623653	NaN	-1.51112	-2.51852	NaN	1.51003	1.45113
Q9UEE5	Q9UEE5	Serine/threonine-protein kinase 17A	STK17A	apoptosis;biological regulation;cell death;cellular macromolecule metabolic process;cellular metabolic process;cellular process;cellular protein metabolic process;cellular response to stimulus;death;intracellular signal transduction;macromolecule metabolic process;macromolecule modification;metabolic process;phosphate-containing compound metabolic process;phosphorus metabolic process;phosphorylat…	adenyl nucleotide binding;adenyl ribonucleotide binding;ATP binding;binding;catalytic activity;kinase activity;nucleotide binding;phosphotransferase activity, alcohol group as acceptor;protein kinase activity;protein serine/threonine kinase activity;purine nucleotide binding;purine ribonucleoside triphosphate binding;purine ribonucleotide binding;ribonucleotide binding;transferase activity;transf…	cell part;intracellular membrane-bounded organelle;intracellular organelle;intracellular part;membrane-bounded organelle;nucleus;organelle	Pkinase	3	3	15	15	46.558	0	23.677	357650000	-2.13894	-2.7808	NaN	NaN	-1.06902	-1.08973	NaN	NaN	-0.36344	-0.863033	-1.80309	-0.738266	NaN	NaN	NaN	NaN	NaN	NaN	NaN	NaN	NaN	NaN	NaN	NaN	NaN	-3.28213	NaN	-2.43893	NaN	NaN	NaN	NaN	-2.10705	-1.85747
O94768;C9JZJ1;U3KQF8	O94768;C9JZJ1	Serine/threonine-protein kinase 17B	STK17B	apoptosis;biological regulation;cell death;cellular macromolecule metabolic process;cellular metabolic process;cellular process;cellular protein metabolic process;cellular response to stimulus;death;intracellular signal transduction;macromolecule metabolic process;macromolecule modification;metabolic process;phosphate-containing compound metabolic process;phosphorus metabolic process;phosphorylat…	adenyl nucleotide binding;adenyl ribonucleotide binding;ATP binding;binding;catalytic activity;kinase activity;nucleotide binding;phosphotransferase activity, alcohol group as acceptor;protein kinase activity;protein serine/threonine kinase activity;purine nucleotide binding;purine ribonucleoside triphosphate binding;purine ribonucleotide binding;ribonucleotide binding;transferase activity;transf…	actin cytoskeleton;cell part;cytoplasmic part;cytoskeleton;endoplasmic reticulum-Golgi intermediate compartment;intracellular membrane-bounded organelle;intracellular non-membrane-bounded organelle;intracellular organelle;intracellular part;membrane;membrane-bounded organelle;non-membrane-bounded organelle;nucleus;organelle;plasma membrane	Pkinase	6	6	19.9	19.9	42.344	0	33.806	874580000	NaN	-3.74997	NaN	NaN	-0.799366	-1.29021	-1.50121	-2.00234	-3.03064	-2.58204	-1.55447	-0.0812244	NaN	-1.59123	-3.18733	-1.23476	-1.32499	NaN	-3.73695	-2.21303	-2.63644	-1.41024	NaN	-1.86771	-1.859	-2.31165	-3.74805	-2.07498	0.280224	-0.249855	-3.60669	-3.73116	-0.408218	-1.29805
B4DR80;Q9Y6E0-2;Q9Y6E0;H0Y630;Q5JV98;Q5JV99	B4DR80;Q9Y6E0-2;Q9Y6E0;H0Y630	Serine/threonine-protein kinase 24;Serine/threonine-protein kinase 24 36 kDa subunit;Serine/threonine-protein kinase 24 12 kDa subunit	STK24	activation of protein kinase activity;apoptosis;biological regulation;cell death;cellular component disassembly;cellular component disassembly at cellular level;cellular component disassembly involved in apoptosis;cellular component organization;cellular component organization at cellular level;cellular component organization or biogenesis;cellular component organization or biogenesis at cellular…	adenyl nucleotide binding;adenyl ribonucleotide binding;ATP binding;binding;catalytic activity;cation binding;ion binding;kinase activity;metal ion binding;nucleotide binding;phosphotransferase activity, alcohol group as acceptor;protein kinase activity;protein serine/threonine kinase activity;purine nucleotide binding;purine ribonucleoside triphosphate binding;purine ribonucleotide binding;ribon…	cell part;cytoplasm;cytoplasmic part;cytosol;extracellular membrane-bounded organelle;extracellular organelle;extracellular region part;extracellular vesicular exosome;intracellular membrane-bounded organelle;intracellular non-membrane-bounded organelle;intracellular organelle;intracellular organelle part;intracellular part;membrane;membrane-bounded organelle;membrane-bounded vesicle;non-membrane…	Pkinase	29	17	68.2	50.2	45.835	0	309.67	8847000000	0.375196	0.869799	-0.737516	0.782084	2.857	3.04151	1.52357	1.20484	2.9511	2.76856	2.50891	2.56227	1.46472	2.08056	2.12792	1.5905	2.22142	1.6005	1.89391	1.79252	1.83062	1.55007	1.44923	1.3809	1.10005	1.81632	1.61552	1.39396	2.50888	1.84208	1.55159	1.77152	2.5694	2.74018
O00506;O00506-3;O00506-2;C9JDH9;C9J6L2;C9JCC0;C9J232;H7C279;E7EM58;C9JN58	O00506;O00506-3;O00506-2;C9JDH9;C9J6L2;C9JCC0;C9J232;H7C279	Serine/threonine-protein kinase 25	STK25	activation of protein kinase activity;biological regulation;cellular component assembly;cellular component assembly at cellular level;cellular component organization;cellular component organization at cellular level;cellular component organization or biogenesis;cellular component organization or biogenesis at cellular level;cellular localization;cellular macromolecule metabolic process;cellular m…	adenyl nucleotide binding;adenyl ribonucleotide binding;ATP binding;binding;catalytic activity;cation binding;identical protein binding;ion binding;kinase activity;metal ion binding;nucleotide binding;phosphotransferase activity, alcohol group as acceptor;protein binding;protein dimerization activity;protein homodimerization activity;protein kinase activity;protein serine/threonine kinase activit…	cell part;cytoplasm;cytoplasmic part;extracellular membrane-bounded organelle;extracellular organelle;extracellular region part;extracellular vesicular exosome;Golgi apparatus;intracellular membrane-bounded organelle;intracellular organelle;intracellular part;membrane-bounded organelle;membrane-bounded vesicle;organelle;vesicle	Pkinase	11	3	35.9	18.3	48.111	0	21.642	629190000	-3.838	NaN	NaN	NaN	-0.390675	-0.0221767	NaN	NaN	-0.480866	-0.344416	-0.471134	-0.253927	NaN	NaN	NaN	NaN	NaN	NaN	-1.92937	NaN	NaN	NaN	-2.36707	NaN	-2.58537	NaN	NaN	-2.7701	-1.57541	NaN	-2.24789	NaN	-0.897932	-0.54739
Q13188;Q13188-2;A0A087WZ06;E5RFQ9;Q8NBU1;E5RIM6	Q13188;Q13188-2;A0A087WZ06	Serine/threonine-protein kinase 3;Serine/threonine-protein kinase 3 36kDa subunit;Serine/threonine-protein kinase 3 20kDa subunit	STK3	activation of MAPKK activity;activation of protein kinase activity;anatomical structure development;anatomical structure formation involved in morphogenesis;apoptosis;biological regulation;cell death;cell differentiation;cell differentiation involved in embryonic placenta development;cellular developmental process;cellular macromolecule metabolic process;cellular metabolic process;cellular proces…	adenyl nucleotide binding;adenyl ribonucleotide binding;ATP binding;binding;catalytic activity;cation binding;enzyme activator activity;enzyme regulator activity;ion binding;kinase activator activity;kinase activity;kinase regulator activity;magnesium ion binding;MAP kinase kinase kinase activity;metal ion binding;molecular transducer activity;nucleotide binding;phosphotransferase activity, alcoh…	cell part;cytoplasm;cytoplasmic part;cytosol;intracellular membrane-bounded organelle;intracellular organelle;intracellular part;membrane-bounded organelle;nucleus;organelle	Mst1_SARAH;Pkinase	39	28	65.6	50.5	56.3	0	323.31	47338000000	3.75588	4.16584	3.41419	4.2253	4.79404	4.81741	5.03464	4.49573	4.71802	4.65853	4.66686	4.70553	4.53543	5.18513	4.97333	5.06936	4.77599	4.68312	4.87255	4.94995	4.41733	4.16844	4.77038	4.81106	4.74538	4.80203	4.39452	4.5969	5.10783	4.92653	4.77537	4.9271	4.36166	4.6772
Q9BYT3;F8WAK5;H0YEZ7;C9JCS6;C9J8B1;C9J5G1;E9PNP9	Q9BYT3;F8WAK5;H0YEZ7	Serine/threonine-protein kinase 33	STK33	cellular macromolecule metabolic process;cellular metabolic process;cellular process;cellular protein metabolic process;macromolecule metabolic process;macromolecule modification;metabolic process;phosphate-containing compound metabolic process;phosphorus metabolic process;phosphorylation;primary metabolic process;protein autophosphorylation;protein metabolic process;protein modification process;…	adenyl nucleotide binding;adenyl ribonucleotide binding;ATP binding;binding;catalytic activity;kinase activity;nucleotide binding;phosphotransferase activity, alcohol group as acceptor;protein kinase activity;protein serine/threonine kinase activity;purine nucleotide binding;purine ribonucleoside triphosphate binding;purine ribonucleotide binding;ribonucleotide binding;transferase activity;transf…	cell part;cytoplasmic part;intracellular part;perinuclear region of cytoplasm	Pkinase	51	0	73.7	0	57.83	0	323.31	119550000000	4.95053	5.21914	4.50383	5.00022	6.06259	6.24757	6.15202	6.03467	6.01661	6.07569	6.15106	5.95524	6.02849	6.22278	6.4467	5.9771	6.0983	5.94977	6.3752	6.36653	5.44435	4.91727	6.19527	6.0561	6.44941	6.49369	5.90098	5.90381	6.51777	6.07538	6.28677	6.20223	6.04468	6.32708
A0A0C4DGC9;Q8TDR2	A0A0C4DGC9;Q8TDR2	Serine/threonine-protein kinase 35	STK35		adenyl nucleotide binding;adenyl ribonucleotide binding;ATP binding;binding;catalytic activity;kinase activity;nucleotide binding;phosphotransferase activity, alcohol group as acceptor;protein kinase activity;protein serine/threonine kinase activity;purine nucleotide binding;purine ribonucleoside triphosphate binding;purine ribonucleotide binding;ribonucleotide binding;transferase activity;transf…	cell part;cytoplasm;intracellular non-membrane-bounded organelle;intracellular organelle;intracellular organelle part;intracellular part;non-membrane-bounded organelle;nuclear part;nucleolus;organelle;organelle part	Pkinase	2	2	10.6	10.6	43.911	0.0035336	3.4902	58017000	NaN	NaN	NaN	NaN	NaN	NaN	-2.69056	-3.09292	NaN	NaN	NaN	NaN	-3.1186	-2.35848	-3.2251	-2.62907	-2.48639	-2.85857	NaN	-2.90602	-3.69633	-3.25033	-3.65697	-2.85545	NaN	-3.0568	-3.83069	-3.12036	-3.01938	-2.27496	-3.46778	-2.67324	NaN	NaN
Q15208	Q15208	Serine/threonine-protein kinase 38	STK38	biological regulation;cellular macromolecule metabolic process;cellular metabolic process;cellular process;cellular protein metabolic process;cellular response to stimulus;intracellular signal transduction;macromolecule metabolic process;macromolecule modification;metabolic process;negative regulation of catalytic activity;negative regulation of kinase activity;negative regulation of MAP kinase a…	adenyl nucleotide binding;adenyl ribonucleotide binding;ATP binding;binding;catalytic activity;cation binding;enzyme binding;ion binding;kinase activity;kinase binding;magnesium ion binding;metal ion binding;mitogen-activated protein kinase kinase kinase binding;nucleotide binding;phosphotransferase activity, alcohol group as acceptor;protein binding;protein kinase activity;protein kinase binding…	cell part;cytoplasm;histone methyltransferase complex;intracellular membrane-bounded organelle;intracellular organelle;intracellular organelle part;intracellular part;macromolecular complex;membrane-bounded organelle;methyltransferase complex;MLL5-L complex;nuclear part;nucleoplasm part;nucleus;organelle;organelle part;protein complex	Pkinase;Pkinase_C	22	18	57.8	51.2	54.19	0	137.93	8110500000	0.884371	0.976463	0.759697	1.30191	2.71946	3.0867	1.94733	1.48163	2.43861	2.86049	2.36935	2.56873	1.14546	1.38242	1.03846	1.5151	1.29657	1.87125	1.64829	1.74343	1.01442	0.0448322	1.85546	1.90405	2.03542	1.80919	0.765413	0.629366	1.13854	1.64336	1.13637	1.58176	2.49458	2.61391
Q9Y2H1;F5H277;Q9Y2H1-2;F5GY51;F5H7Z3;F5H5E6;F5H0V1;H0YGN4;I3L0D0	Q9Y2H1;F5H277;Q9Y2H1-2	Serine/threonine-protein kinase 38-like	STK38L	biological regulation;cellular macromolecule metabolic process;cellular metabolic process;cellular process;cellular protein metabolic process;cellular response to stimulus;intracellular signal transduction;macromolecule metabolic process;macromolecule modification;metabolic process;phosphate-containing compound metabolic process;phosphorus metabolic process;phosphorylation;primary metabolic proce…	adenyl nucleotide binding;adenyl ribonucleotide binding;ATP binding;binding;catalytic activity;cation binding;ion binding;kinase activity;magnesium ion binding;metal ion binding;nucleotide binding;phosphotransferase activity, alcohol group as acceptor;protein kinase activity;protein serine/threonine kinase activity;purine nucleotide binding;purine ribonucleoside triphosphate binding;purine ribonu…	actin cytoskeleton;cell part;cytoplasm;cytoskeleton;intracellular non-membrane-bounded organelle;intracellular organelle;intracellular part;membrane;non-membrane-bounded organelle;organelle	Pkinase;Pkinase_C	13	9	40.1	33.4	54.002	0	73.685	1015300000	NaN	-0.999519	NaN	NaN	0.615494	0.750921	-1.9302	-2.58438	0.119034	0.20602	0.191347	0.385656	NaN	NaN	-3.60922	NaN	NaN	NaN	NaN	-2.66257	-2.89959	NaN	NaN	NaN	NaN	-1.99163	NaN	NaN	-2.68472	-2.35941	NaN	-2.34634	0.28793	1.07886
Q9UEW8-2;Q9UEW8;C9JIG9;O95747	Q9UEW8-2;Q9UEW8;C9JIG9;O95747	STE20/SPS1-related proline-alanine-rich protein kinase;Serine/threonine-protein kinase OSR1	STK39/OXSR1	activation of protein kinase activity;biological regulation;cellular hypotonic response;cellular macromolecule metabolic process;cellular metabolic process;cellular process;cellular protein metabolic process;cellular response to abiotic stimulus;cellular response to osmotic stress;cellular response to stimulus;cellular response to stress;hypotonic response;intracellular protein kinase cascade;int…	adenyl nucleotide binding;adenyl ribonucleotide binding;ATP binding;binding;catalytic activity;cation binding;ion binding;kinase activity;magnesium ion binding;metal ion binding;molecular transducer activity;nucleotide binding;phosphotransferase activity, alcohol group as acceptor;protein kinase activity;protein serine/threonine kinase activity;purine nucleotide binding;purine ribonucleoside trip…	apical plasma membrane;basolateral plasma membrane;cell part;cytoplasm;cytoskeleton;extracellular membrane-bounded organelle;extracellular organelle;extracellular region part;extracellular vesicular exosome;intracellular membrane-bounded organelle;intracellular non-membrane-bounded organelle;intracellular organelle;intracellular part;membrane part;membrane-bounded organelle;membrane-bounded vesic…	OSR1_C;Pkinase	2	2	6.3	6.3	57.937	0	12.725	133490000	NaN	-1.92692	NaN	NaN	-2.9004	NaN	NaN	-2.73119	-2.97862	NaN	NaN	NaN	NaN	NaN	-2.36501	NaN	NaN	NaN	NaN	NaN	-1.99676	NaN	NaN	NaN	NaN	NaN	-2.68131	NaN	NaN	-2.7592	NaN	-1.88779	-2.94887	NaN
Q13043;Q13043-2;F5H5B4;A0A087WVN8;A0A087WYT4;C9K0M6;C9JIH8;K7EKT6;K7ER95;Q92918-2;Q92918	Q13043;Q13043-2;F5H5B4	Serine/threonine-protein kinase 4;Serine/threonine-protein kinase 4 37kDa subunit;Serine/threonine-protein kinase 4 18kDa subunit	STK4	activation of JUN kinase activity;activation of MAPK activity;activation of MAPKK activity;activation of MAPKKK activity;activation of protein kinase activity;anatomical structure development;anatomical structure formation involved in morphogenesis;anatomical structure morphogenesis;apoptosis;biological regulation;branching morphogenesis of a tube;cell death;cell differentiation;cell differentiat…	adenyl nucleotide binding;adenyl ribonucleotide binding;ATP binding;binding;catalytic activity;cation binding;enzyme activator activity;enzyme regulator activity;identical protein binding;ion binding;kinase activator activity;kinase activity;kinase regulator activity;magnesium ion binding;MAP kinase kinase kinase activity;MAP kinase kinase kinase kinase activity;metal ion binding;molecular transd…	cell part;cytoplasm;cytoplasmic part;cytosol;intracellular membrane-bounded organelle;intracellular organelle;intracellular organelle part;intracellular part;membrane;membrane-bounded organelle;nuclear part;nucleoplasm;nucleus;organelle;organelle part	CNH;Mst1_SARAH;Pkinase	43	32	77.8	62.6	55.63	0	323.31	271880000000	6.45805	6.73552	5.94343	6.64702	7.27854	7.55559	7.37631	7.02116	7.18219	7.52819	7.18581	7.25159	7.01385	7.41385	7.3621	7.28633	7.10466	6.97048	7.25815	7.25003	6.70213	6.17894	7.04502	7.14716	6.97962	7.27027	6.75346	7.08028	7.36495	7.16209	7.02974	7.17591	7.14818	7.39072
Q7RTN6-4;Q7RTN6-6;Q7RTN6-2;Q7RTN6-5;Q7RTN6-3;Q7RTN6;J3QS66	Q7RTN6-4;Q7RTN6-6;Q7RTN6-2;Q7RTN6-5;Q7RTN6-3;Q7RTN6;J3QS66	STE20-related kinase adapter protein alpha	STRADA	actin cytoskeleton organization;actin filament-based process;activation of protein kinase activity;biological regulation;cell cycle arrest;cell cycle process;cell migration;cell motility;cell surface receptor linked signaling pathway;cellular component movement;cellular component organization;cellular component organization at cellular level;cellular component organization or biogenesis;cellular …	adenyl nucleotide binding;adenyl ribonucleotide binding;ATP binding;binding;catalytic activity;enzyme activator activity;enzyme binding;enzyme regulator activity;kinase activator activity;kinase activity;kinase binding;kinase regulator activity;nucleotide binding;phosphotransferase activity, alcohol group as acceptor;protein binding;protein kinase activator activity;protein kinase activity;protei…	cell part;cytoplasm;cytoplasmic part;cytosol;intracellular membrane-bounded organelle;intracellular organelle;intracellular organelle part;intracellular part;membrane-bounded organelle;nuclear part;nucleoplasm;nucleus;organelle;organelle part	Pkinase	2	2	10.4	10.4	33.277	0.00067935	7.3608	169270000	NaN	NaN	NaN	NaN	-2.45152	-1.55024	NaN	NaN	NaN	-2.01656	-2.05893	-2.40843	NaN	NaN	NaN	NaN	NaN	NaN	NaN	NaN	NaN	NaN	NaN	NaN	NaN	-4.58331	NaN	NaN	NaN	NaN	NaN	NaN	NaN	NaN
P43405;P43405-2;P43403-2;P43403-3;P43403;Q8NFD2	P43405;P43405-2	Tyrosine-protein kinase SYK	SYK	activation of immune response;activation of innate immune response;activation of JUN kinase activity;activation of MAPK activity;adaptive immune response;alkene biosynthetic process;amine transport;anatomical structure development;anatomical structure formation involved in morphogenesis;anatomical structure morphogenesis;angiogenesis;antigen receptor-mediated signaling pathway;B cell activation;B…	adenyl nucleotide binding;adenyl ribonucleotide binding;ATP binding;binding;catalytic activity;integrin binding;kinase activity;molecular transducer activity;non-membrane spanning protein tyrosine kinase activity;nucleotide binding;phosphotransferase activity, alcohol group as acceptor;protein binding;protein complex binding;protein kinase activity;protein serine/threonine kinase activity;protein…	B cell receptor complex;cell junction;cell part;cell-cell junction;cytoplasm;cytoplasmic membrane-bounded vesicle;cytoplasmic part;cytoplasmic vesicle;cytosol;early phagosome;endocytic vesicle;extrinsic to internal side of plasma membrane;extrinsic to membrane;extrinsic to plasma membrane;immunoglobulin complex;immunological synapse;intracellular membrane-bounded organelle;intracellular organelle…	Ank;Ank_2;Pkinase_Tyr;SH2	28	27	69.3	68.2	72.065	0	183.12	8585200000	0.247435	0.630545	1.34477	0.989096	3.25073	3.41148	2.05619	0.880304	2.77689	2.96922	2.89066	2.65679	0.68392	0.921854	1.19231	1.19983	1.53631	1.28669	1.56661	1.35964	1.61061	0.479679	1.19591	0.674646	1.30901	1.45165	0.615148	-0.00846672	2.24172	1.7168	1.24724	1.51964	2.87821	3.23812
Q9UL54-2;Q9UL54-4;Q9UL54;Q7L7X3-2;Q7L7X3-3;Q9H2K8;Q7L7X3;Q9UL54-3	Q9UL54-2;Q9UL54-4;Q9UL54;Q7L7X3-2;Q7L7X3-3;Q9H2K8;Q7L7X3;Q9UL54-3	Serine/threonine-protein kinase TAO2;Serine/threonine-protein kinase TAO1;Serine/threonine-protein kinase TAO3	TAOK1/2/3	actin cytoskeleton organization;actin filament-based process;activation of MAPKK activity;activation of protein kinase activity;anatomical structure development;apoptosis;biological regulation;cell cycle;cell cycle checkpoint;cell cycle process;cell death;cell junction assembly;cell junction organization;cell migration;cell motility;cell-substrate junction assembly;cellular component assembly;cel…	adenyl nucleotide binding;adenyl ribonucleotide binding;ATP binding;binding;catalytic activity;enzyme binding;enzyme inhibitor activity;enzyme regulator activity;kinase activity;kinase binding;kinase inhibitor activity;kinase regulator activity;MAP kinase kinase kinase activity;mitogen-activated protein kinase kinase binding;molecular transducer activity;nucleotide binding;phosphotransferase acti…	cell part;cell projection;cytoplasm;cytoplasmic membrane-bounded vesicle;cytoplasmic part;cytoplasmic vesicle;cytoplasmic vesicle membrane;cytoplasmic vesicle part;cytoskeleton;cytosol;dendrite;extracellular membrane-bounded organelle;extracellular organelle;extracellular region part;extracellular vesicular exosome;integral to membrane;intracellular membrane-bounded organelle;intracellular non-me…	Pkinase	2	2	2.5	2.5	119.28	0.002451	4.2866	308870000	NaN	NaN	NaN	NaN	NaN	NaN	-0.558788	-1.31555	NaN	-2.62	NaN	NaN	-1.95301	-1.46886	-1.36431	-1.12526	-1.07209	-1.53014	-1.58396	-1.29775	-2.87607	-2.50285	-1.09635	-1.04798	-2.46291	-0.863218	-1.34711	-1.44529	-0.951811	-1.32512	-1.25696	-1.60554	NaN	-2.15599
Q9UHD2;F5H206;F5H1A3;F5GZI4	Q9UHD2	Serine/threonine-protein kinase TBK1	TBK1	activation of immune response;activation of innate immune response;biological regulation;cellular process;cellular response to stimulus;cytokine production;defense response;defense response to bacterium;defense response to Gram-positive bacterium;defense response to virus;I-kappaB kinase/NF-kappaB cascade;immune effector process;immune response;immune response-activating signal transduction;immun…	adenyl nucleotide binding;adenyl ribonucleotide binding;ATP binding;binding;catalytic activity;kinase activity;nucleic acid binding;nucleotide binding;phosphoprotein binding;phosphotransferase activity, alcohol group as acceptor;protein binding;protein kinase activity;protein serine/threonine kinase activity;purine nucleotide binding;purine ribonucleoside triphosphate binding;purine ribonucleotid…	cell part;cytoplasm;cytoplasmic part;cytosol;endosomal part;endosome membrane;intracellular organelle part;intracellular part;membrane;organelle membrane;organelle part	Pkinase	90	88	92.9	91.6	83.641	0	323.31	951300000000	7.84746	8.14513	7.35521	8.00572	9.1387	9.35005	9.07557	8.96114	9.01014	9.26172	9.07231	9.17532	8.4641	8.8291	9.03726	8.91544	8.77603	8.91295	9.03591	9.02176	8.42574	8.03838	8.89262	8.82472	8.83278	8.98658	8.43847	8.53031	9.13434	9.13963	8.62835	8.88177	9.03791	9.21584
P42680;D6RB05;D6RB75;REV__Q9BZC7-2;REV__Q9BZC7;REV__Q9BZC7-3;P51813	P42680	Tyrosine-protein kinase Tec	TEC	activation of immune response;adaptive immune response;anatomical structure development;anatomical structure morphogenesis;antigen receptor-mediated signaling pathway;apoptosis;B cell receptor signaling pathway;biological adhesion;biological regulation;cell adhesion;cell death;cell differentiation;cell surface receptor linked signaling pathway;cellular component disassembly;cellular component dis…	adenyl nucleotide binding;adenyl ribonucleotide binding;ATP binding;binding;catalytic activity;cation binding;ion binding;kinase activity;lipid binding;metal ion binding;molecular transducer activity;non-membrane spanning protein tyrosine kinase activity;nucleotide binding;phospholipid binding;phosphotransferase activity, alcohol group as acceptor;protein kinase activity;protein tyrosine kinase a…	cell junction;cell part;cell projection membrane;cell projection part;cell-cell junction;cytoplasmic part;cytoskeleton;cytosol;extrinsic to internal side of plasma membrane;extrinsic to membrane;extrinsic to plasma membrane;intracellular non-membrane-bounded organelle;intracellular organelle;intracellular part;leading edge membrane;membrane part;non-membrane-bounded organelle;organelle;plasma mem…	BTK;PH;Pkinase_Tyr;SH2;SH3_1	57	56	74.3	73.2	73.58	0	323.31	86520000000	4.14926	4.61807	3.48638	4.10551	5.82325	5.9351	5.66251	5.75883	5.69966	6.0681	5.68088	5.78848	5.15339	5.64663	5.68762	5.48958	5.27378	5.64997	5.66535	5.73332	4.83651	4.41359	5.44067	5.61421	5.56951	5.70462	5.05637	5.48707	5.85706	5.786	5.31743	5.64473	5.59016	5.99563
P36897;P36897-2;B4DY26;P36897-3;F8W1R9;F8VXZ5;F8VVC4;H0YHS4;F8VRH6;F8W0K6	P36897;P36897-2;B4DY26;P36897-3;F8W1R9	TGF-beta receptor type-1	TGFBR1	activation of MAPKK activity;activation of protein kinase activity;activin receptor signaling pathway;anatomical structure development;anatomical structure formation involved in morphogenesis;anatomical structure morphogenesis;angiogenesis;anterior/posterior pattern specification;apoptosis;artery morphogenesis;biological regulation;blastocyst development;blood vessel morphogenesis;cardiac epithel…	adenyl nucleotide binding;adenyl ribonucleotide binding;ATP binding;binding;catalytic activity;cation binding;cytokine binding;cytokine receptor binding;growth factor binding;ion binding;I-SMAD binding;kinase activity;metal ion binding;molecular transducer activity;nucleotide binding;phosphotransferase activity, alcohol group as acceptor;protein binding;protein kinase activity;protein serine/thre…	cell;cell junction;cell part;cell-cell junction;cytoplasmic part;endosome;integral to membrane;intracellular membrane-bounded organelle;intracellular organelle;intracellular part;intrinsic to membrane;macromolecular complex;membrane;membrane part;membrane-bounded organelle;occluding junction;organelle;plasma membrane;plasma membrane part;protein complex;receptor complex;tight junction;transformin…	Activin_recp;Pkinase;TGF_beta_GS	30	24	60	53.1	55.959	0	323.31	24806000000	3.26617	3.28601	0.377375	1.60422	4.80475	4.88742	2.28127	2.06438	4.58472	4.58366	4.43546	4.44803	-0.0354996	1.03499	1.06696	0.684877	1.46737	0.963892	0.273094	-3.95686	-0.98617	-2.07153	1.63464	1.03154	3.04527	3.00588	2.89381	2.73702	3.2813	2.63273	3.08513	3.03026	-0.188841	-1.64123
P37173;P37173-2	P37173;P37173-2	TGF-beta receptor type-2	TGFBR2	activation of protein kinase activity;aging;anatomical structure development;anatomical structure formation involved in morphogenesis;anatomical structure morphogenesis;apoptosis;biological regulation;blood vessel development;brain development;branching morphogenesis of a tube;bronchus morphogenesis;cell activation;cell death;cell differentiation;cell growth;cell surface receptor linked signaling…	adenyl nucleotide binding;adenyl ribonucleotide binding;ATP binding;binding;carbohydrate binding;catalytic activity;cation binding;cytokine binding;cytokine receptor binding;glycosaminoglycan binding;growth factor binding;ion binding;kinase activity;metal ion binding;molecular transducer activity;nucleotide binding;pattern binding;phosphotransferase activity, alcohol group as acceptor;polysacchar…	caveola;cell part;cytoplasmic part;cytosol;external side of plasma membrane;integral to membrane;intracellular part;intrinsic to membrane;macromolecular complex;membrane;membrane part;membrane raft;plasma membrane;plasma membrane part;protein complex;receptor complex;transforming growth factor beta receptor complex	ecTbetaR2;Pkinase	6	6	18	18	64.567	0	14.213	1039600000	-2.92756	-3.00467	NaN	-0.474707	0.360968	-0.241222	NaN	-2.04543	-1.75272	-0.912649	-0.338772	-0.0236683	-1.70786	-1.54933	-1.07676	-1.90708	-1.20008	-2.32201	-2.24916	-1.82756	NaN	NaN	-1.19405	-1.65852	-1.44171	-1.55944	-0.888538	-1.94711	-0.371811	-0.910738	-1.37444	NaN	NaN	-4.71999
J3KRK0;Q86UE8-3;Q86UE8-2;Q86UE8;J3QLK5;J3KT82;J3QS44	J3KRK0;Q86UE8-3;Q86UE8-2;Q86UE8;J3QLK5	Serine/threonine-protein kinase tousled-like 2	TLK2	biological regulation;cell cycle;cellular component organization;cellular component organization at cellular level;cellular component organization or biogenesis;cellular component organization or biogenesis at cellular level;cellular macromolecule metabolic process;cellular metabolic process;cellular process;cellular protein metabolic process;cellular response to abiotic stimulus;cellular respons…	adenyl nucleotide binding;adenyl ribonucleotide binding;ATP binding;binding;catalytic activity;kinase activity;nucleotide binding;phosphotransferase activity, alcohol group as acceptor;protein kinase activity;protein serine/threonine kinase activity;purine nucleotide binding;purine ribonucleoside triphosphate binding;purine ribonucleotide binding;ribonucleotide binding;transferase activity;transf…	cell part;cytoplasmic part;cytoskeletal part;intermediate filament;intracellular membrane-bounded organelle;intracellular organelle;intracellular organelle part;intracellular part;macromolecular complex;membrane-bounded organelle;nucleus;organelle;organelle part;perinuclear region of cytoplasm;protein complex	Pkinase	3	3	8.8	8.8	68.832	0.0019317	5.5193	618080000	-4.62228	-2.50552	NaN	-3.13908	-0.815016	-0.779226	NaN	NaN	-0.654333	-0.502865	-0.973965	-1.05509	-5.53408	NaN	-4.14154	NaN	-4.81375	NaN	NaN	NaN	-5.34806	NaN	-4.04219	NaN	NaN	NaN	-4.74264	NaN	NaN	NaN	NaN	NaN	-1.26245	-1.14513
Q9UKE5-2;Q9UKE5;Q9UKE5-5;Q9UKE5-3;Q9UKE5-6;Q9UKE5-4;Q9UKE5-8;Q9UKE5-7;C9J338;I3L203;C9JVV1;I3L1U1	Q9UKE5-2;Q9UKE5;Q9UKE5-5;Q9UKE5-3;Q9UKE5-6;Q9UKE5-4;Q9UKE5-8;Q9UKE5-7	TRAF2 and NCK-interacting protein kinase	TNIK	actin cytoskeleton organization;actin cytoskeleton reorganization;actin filament-based process;activation of JNKK activity;activation of MAPKK activity;activation of protein kinase activity;biological regulation;cell projection assembly;cell projection organization;cell surface receptor linked signaling pathway;cellular component assembly;cellular component assembly at cellular level;cellular com…	adenyl nucleotide binding;adenyl ribonucleotide binding;ATP binding;binding;catalytic activity;kinase activity;nucleotide binding;phosphotransferase activity, alcohol group as acceptor;protein kinase activity;protein serine/threonine kinase activity;purine nucleotide binding;purine ribonucleoside triphosphate binding;purine ribonucleotide binding;ribonucleotide binding;transferase activity;transf…	apical plasma membrane;cell part;cytoplasm;cytoplasmic part;cytoskeleton;endosome;extracellular membrane-bounded organelle;extracellular organelle;extracellular region part;extracellular vesicular exosome;intracellular membrane-bounded organelle;intracellular non-membrane-bounded organelle;intracellular organelle;intracellular organelle part;intracellular part;membrane part;membrane-bounded organ…	CNH;Pkinase	56	38	51.4	41.8	151.3	0	323.31	39953000000	3.08822	3.78758	2.62272	3.86283	4.52129	4.66838	4.58201	4.56748	4.29086	4.37671	4.30361	4.24172	4.59488	4.85767	4.82052	4.95315	4.76617	4.59344	4.96566	4.80805	4.23541	3.62476	4.6904	4.55999	4.72903	4.59586	4.13234	4.31223	4.77546	4.59003	4.58724	4.54442	4.21042	4.47456
Q13470-2;Q13470;I3L334;U3KPR9	Q13470-2;Q13470	Non-receptor tyrosine-protein kinase TNK1	TNK1	biological regulation;cell differentiation;cell migration;cell motility;cell surface receptor linked signaling pathway;cellular component movement;cellular developmental process;cellular macromolecule metabolic process;cellular metabolic process;cellular process;cellular protein metabolic process;cellular response to stimulus;defense response;developmental process;enzyme linked receptor protein s…	adenyl nucleotide binding;adenyl ribonucleotide binding;ATP binding;binding;catalytic activity;hormone receptor binding;kinase activity;molecular transducer activity;non-membrane spanning protein tyrosine kinase activity;nucleotide binding;phosphotransferase activity, alcohol group as acceptor;protein binding;protein kinase activity;protein tyrosine kinase activity;purine nucleotide binding;purin…	cell part;cytoplasm;cytoplasmic part;cytosol;extrinsic to internal side of plasma membrane;extrinsic to membrane;extrinsic to plasma membrane;intracellular part;membrane;membrane part;plasma membrane part	Pkinase_Tyr	25	25	50.5	50.5	71.921	0	245.99	25960000000	2.36055	2.73922	1.83813	2.70784	4.2094	3.94746	3.57126	3.00886	4.30935	4.58542	4.32899	3.70237	3.12093	3.58081	3.80209	3.53673	3.56451	3.4224	3.36305	3.80631	3.24212	2.5477	3.30619	3.12957	3.43832	3.68233	3.15929	3.24352	3.58263	3.59693	3.27906	3.3138	4.41468	4.31857
Q07912;C9J1X3;Q07912-3;Q07912-2;H7BZZ3;H7BZM8;H7C343;H7C412;F8WER3;C9JDG3;C9JIR5	Q07912;C9J1X3;Q07912-3;Q07912-2	Activated CDC42 kinase 1	TNK2	biological regulation;cell differentiation;cell migration;cell motility;cell surface receptor linked signaling pathway;cellular component movement;cellular component organization;cellular component organization or biogenesis;cellular developmental process;cellular membrane organization;cellular metabolic process;cellular process;cellular response to stimulus;defense response;developmental process…	adenyl nucleotide binding;adenyl ribonucleotide binding;ATP binding;binding;catalytic activity;cation binding;enzyme inhibitor activity;enzyme regulator activity;epidermal growth factor receptor binding;growth factor receptor binding;GTPase inhibitor activity;GTPase regulator activity;hormone receptor binding;identical protein binding;ion binding;kinase activity;metal ion binding;non-membrane spa…	adherens junction;anchoring junction;axon;cell body;cell junction;cell part;cell projection;cell projection part;clathrin-coated vesicle;coated pit;coated vesicle;cytoplasm;cytoplasmic membrane-bounded vesicle;cytoplasmic part;cytoplasmic vesicle;cytoplasmic vesicle membrane;cytoplasmic vesicle part;dendrite;endosome;extrinsic to internal side of plasma membrane;extrinsic to membrane;extrinsic to…	GTPase_binding;Inhibitor_Mig-6;Pkinase_Tyr;SH3_9	29	20	37.1	25	114.57	0	230.98	15422000000	1.36652	1.59245	0.499517	1.06633	3.43281	3.67142	3.63063	3.2503	3.12887	3.37196	3.32489	3.17387	2.95795	3.20872	3.20914	3.34609	3.87657	3.62101	3.51445	3.36603	3.09869	2.2881	3.69214	3.59877	3.63514	3.60337	2.73144	2.85564	3.17944	3.4474	3.37032	3.73823	2.23977	2.53844
Q96S44;Q5JZ02	Q96S44	TP53-regulating kinase	TP53RK	adenosine metabolic process;cellular macromolecule metabolic process;cellular metabolic process;cellular nitrogen compound metabolic process;cellular process;cellular protein metabolic process;heterocycle metabolic process;macromolecule metabolic process;macromolecule modification;metabolic process;ncRNA metabolic process;ncRNA processing;nitrogen compound metabolic process;nucleic acid metabolic…	adenyl nucleotide binding;adenyl ribonucleotide binding;ATP binding;binding;catalytic activity;hydrolase activity;kinase activity;nucleotide binding;p53 binding;phosphotransferase activity, alcohol group as acceptor;protein binding;protein kinase activity;protein serine/threonine kinase activity;purine nucleotide binding;purine ribonucleoside triphosphate binding;purine ribonucleotide binding;rib…	cell part;cytoplasmic part;cytosol;EKC/KEOPS complex;intracellular membrane-bounded organelle;intracellular organelle;intracellular part;macromolecular complex;membrane;membrane-bounded organelle;nucleus;organelle;protein complex	Kdo	3	3	22.9	22.9	28.16	0.002414	4.0373	90738000	NaN	NaN	NaN	NaN	NaN	NaN	NaN	NaN	NaN	NaN	NaN	NaN	NaN	-1.43169	NaN	NaN	NaN	NaN	NaN	NaN	NaN	-1.69457	NaN	NaN	NaN	NaN	-2.83297	NaN	NaN	NaN	NaN	NaN	NaN	NaN
A0A0A0MTS7;Q8WZ42-11;Q8WZ42-4;Q8WZ42-7;Q8WZ42-2;Q8WZ42;Q8WZ42-8;Q8WZ42-13;Q8WZ42-12;Q8WZ42-5;A0A0A0MRA3;Q8WZ42-3;Q8WZ42-10;Q8WZ42-9;Q8WZ42-6	A0A0A0MTS7;Q8WZ42-11;Q8WZ42-4;Q8WZ42-7;Q8WZ42-2;Q8WZ42;Q8WZ42-8;Q8WZ42-13;Q8WZ42-12;Q8WZ42-5;A0A0A0MRA3;Q8WZ42-3;Q8WZ42-10;Q8WZ42-9	Titin	TTN	actin cytoskeleton organization;actin filament organization;actin filament-based movement;actin filament-based process;actin-mediated cell contraction;actin-myosin filament sliding;actomyosin structure organization;adult heart development;anatomical structure development;anatomical structure formation involved in morphogenesis;anatomical structure morphogenesis;biological regulation;blood coagula…	actin binding;actin filament binding;actinin binding;adenyl nucleotide binding;adenyl ribonucleotide binding;alpha-actinin binding;ATP binding;binding;calcium ion binding;calmodulin binding;catalytic activity;cation binding;cytoskeletal protein binding;enzyme binding;identical protein binding;ion binding;kinase activity;kinase binding;metal ion binding;muscle alpha-actinin binding;nucleotide bind…	cell part;chromosome;condensed chromosome;condensed nuclear chromosome;contractile fiber part;cytoplasmic part;cytoskeletal part;cytosol;extracellular membrane-bounded organelle;extracellular organelle;extracellular region;extracellular region part;extracellular vesicular exosome;I band;intracellular non-membrane-bounded organelle;intracellular organelle;intracellular organelle part;intracellular…	fn3;I-set;Pkinase;PPAK;Titin_Z	81	81	3.8	3.8	3994.6	0	194.04	222090000000	1.22859	4.2283	2.17254	2.52377	7.50297	7.93658	5.62544	6.73157	7.80337	8.15335	7.97747	6.87483	3.48579	4.22545	3.45623	4.48909	6.87859	6.51827	5.48985	7.35937	2.69959	2.60445	4.11727	5.87425	4.10377	3.80186	3.52529	2.71846	2.99211	1.89013	6.79195	6.10045	7.54278	7.80823
P29597;E9PM19;E9PPF2;H0YE41;E9PQM4;K7EJR6;K7EM33;H0YE24;E9PQL2;E9PQE9	P29597;E9PM19;E9PPF2	Non-receptor tyrosine-protein kinase TYK2;Tyrosine-protein kinase	TYK2	biological regulation;cell differentiation;cell migration;cell motility;cell surface receptor linked signaling pathway;cellular component movement;cellular developmental process;cellular macromolecule metabolic process;cellular metabolic process;cellular process;cellular protein metabolic process;cellular response to chemical stimulus;cellular response to cytokine stimulus;cellular response to or…	adenyl nucleotide binding;adenyl ribonucleotide binding;ATP binding;binding;catalytic activity;cytokine receptor binding;growth hormone receptor binding;hormone receptor binding;kinase activity;non-membrane spanning protein tyrosine kinase activity;nucleotide binding;phosphotransferase activity, alcohol group as acceptor;protein binding;protein kinase activity;protein tyrosine kinase activity;pur…	cell part;cytoplasm;cytoplasmic part;cytoskeleton;cytosol;extracellular membrane-bounded organelle;extracellular organelle;extracellular region part;extracellular vesicular exosome;extrinsic to internal side of plasma membrane;extrinsic to membrane;extrinsic to plasma membrane;intracellular membrane-bounded organelle;intracellular non-membrane-bounded organelle;intracellular organelle;intracellul…	Pkinase_Tyr	52	52	54.1	54.1	133.65	0	323.31	27413000000	2.76016	2.97332	2.13778	2.99998	4.04841	4.40381	3.49284	3.19042	3.96686	4.26131	3.83826	4.01331	2.93278	3.36509	3.72279	3.70213	3.41691	3.21894	3.7858	3.32622	2.15577	2.29296	3.70871	3.28221	3.69914	3.83149	2.80118	3.13967	4.39747	3.95699	3.65172	3.60082	3.89182	4.11177
H0YNK6;Q06418;H3BPR7	H0YNK6;Q06418;H3BPR7	Tyrosine-protein kinase receptor TYRO3	TYRO3	anatomical structure development;anatomical structure homeostasis;anatomical structure morphogenesis;apoptotic cell clearance;biological adhesion;biological regulation;cell activation;cell adhesion;cell differentiation;cell migration;cell morphogenesis;cell morphogenesis involved in differentiation;cell motility;cell-cell adhesion;cell-substrate adhesion;cellular component morphogenesis;cellular …	adenyl nucleotide binding;adenyl ribonucleotide binding;ATP binding;binding;catalytic activity;enzyme binding;kinase activity;kinase binding;molecular transducer activity;nucleotide binding;phosphatidylinositol 3-kinase binding;phosphotransferase activity, alcohol group as acceptor;protein binding;protein kinase activity;protein serine/threonine kinase activity;protein tyrosine kinase activity;pu…	cell part;cytoplasmic part;endoplasmic reticulum membrane;endoplasmic reticulum part;envelope;integral to membrane;integral to plasma membrane;intracellular membrane-bounded organelle;intracellular organelle;intracellular organelle part;intracellular part;intrinsic to membrane;intrinsic to plasma membrane;membrane;membrane part;membrane-bounded organelle;nuclear envelope;nuclear part;nucleus;orga…	fn3;I-set;Pkinase_Tyr	3	2	5.9	4.9	92.315	0	21.359	111180000	NaN	NaN	NaN	NaN	-1.61265	-2.44207	NaN	NaN	-2.50915	NaN	NaN	-2.27472	NaN	NaN	NaN	NaN	NaN	NaN	NaN	NaN	NaN	NaN	NaN	NaN	NaN	NaN	NaN	NaN	NaN	NaN	NaN	NaN	-2.92935	-1.81399
O75385;Q8IYT8	O75385	Serine/threonine-protein kinase ULK1	ULK1	anatomical structure morphogenesis;autophagic vacuole assembly;axon extension;biological regulation;cell communication;cell differentiation;cell differentiation in hindbrain;cell growth;cell migration;cell migration in hindbrain;cell motility;cell part morphogenesis;cell projection morphogenesis;cell projection organization;cellular component assembly;cellular component assembly at cellular level…	adenyl nucleotide binding;adenyl ribonucleotide binding;ATP binding;binding;catalytic activity;enzyme binding;GTPase binding;kinase activity;nucleotide binding;phosphotransferase activity, alcohol group as acceptor;protein binding;protein complex binding;protein kinase activity;protein serine/threonine kinase activity;purine nucleotide binding;purine ribonucleoside triphosphate binding;purine rib…	Atg1p signaling complex;autophagic vacuole;cell body;cell part;cell projection;cytoplasm;cytoplasmic part;cytoplasmic vesicle membrane;cytoplasmic vesicle part;cytosol;intracellular membrane-bounded organelle;intracellular organelle;intracellular organelle part;intracellular part;macromolecular complex;membrane;membrane-bounded organelle;neuron projection;neuronal cell body;organelle;organelle me…	DUF3543;Pkinase	3	3	4.1	4.1	112.63	0	38.479	81961000	NaN	NaN	NaN	NaN	-2.13159	-2.1368	-2.81177	NaN	-3.9057	-3.09417	-2.01579	-2.95065	NaN	NaN	NaN	NaN	-3.45286	-4.36964	NaN	NaN	-3.47411	NaN	-3.42829	-3.67516	-3.77173	NaN	NaN	NaN	-3.52186	-3.51677	NaN	NaN	NaN	NaN
Q6PHR2-3	Q6PHR2-3	Serine/threonine-protein kinase ULK3	ULK3	aging;autophagic vacuole assembly;autophagy;biological regulation;catabolic process;cell aging;cellular catabolic process;cellular component assembly;cellular component assembly at cellular level;cellular component organization;cellular component organization at cellular level;cellular component organization or biogenesis;cellular component organization or biogenesis at cellular level;cellular ma…	adenyl nucleotide binding;adenyl ribonucleotide binding;ATP binding;binding;catalytic activity;kinase activity;nucleotide binding;phosphotransferase activity, alcohol group as acceptor;protein kinase activity;protein serine/threonine kinase activity;purine nucleotide binding;purine ribonucleoside triphosphate binding;purine ribonucleotide binding;ribonucleotide binding;transferase activity;transf…	Atg1p signaling complex;cell part;cytoplasm;cytoplasmic part;cytosol;intracellular part;macromolecular complex;membrane;pre-autophagosomal structure;protein complex	MIT;Pkinase	60	1	93	3.2	53.217	0	323.31	434350000000	7.10902	7.1981	6.34609	7.21442	7.98712	8.24159	7.67856	7.76458	8.03327	8.11456	7.996	8.10237	7.34233	7.70488	7.81598	7.83428	7.63765	7.63219	7.64844	7.69879	7.15606	6.87976	7.65048	7.68625	7.64029	8.03833	7.34903	7.541	7.96984	7.9261	7.39172	7.64906	7.8664	8.01162
P30291;P30291-2;E9PRU3;E9PQ51;H0YEJ2;E9PRI3	P30291;P30291-2	Wee1-like protein kinase	WEE1	anatomical structure morphogenesis;biological regulation;blood coagulation;cell cycle;cell cycle phase;cell cycle process;cell division;cell part morphogenesis;cell projection morphogenesis;cell projection organization;cellular component morphogenesis;cellular component organization;cellular component organization at cellular level;cellular component organization or biogenesis;cellular component …	adenyl nucleotide binding;adenyl ribonucleotide binding;ATP binding;binding;catalytic activity;cation binding;ion binding;kinase activity;magnesium ion binding;metal ion binding;non-membrane spanning protein tyrosine kinase activity;nucleotide binding;phosphotransferase activity, alcohol group as acceptor;protein kinase activity;protein tyrosine kinase activity;purine nucleotide binding;purine ri…	cell part;cytoplasm;intracellular membrane-bounded organelle;intracellular organelle;intracellular organelle part;intracellular part;membrane-bounded organelle;nuclear part;nucleoplasm;nucleus;organelle;organelle part	Pkinase	45	45	68.7	68.7	71.597	0	323.31	191130000000	5.35855	5.3406	4.78629	5.4054	6.92805	7.20655	6.97831	6.65006	7.00814	7.33088	6.85436	6.9324	6.59321	6.93312	6.79004	6.789	6.72706	6.78356	6.80673	6.92601	6.21126	5.56192	6.93882	6.72364	6.6255	6.91151	6.39314	6.31979	6.88819	6.73635	6.61295	6.78281	6.72255	7.04525
J3QRU1;P07947	J3QRU1;P07947	Tyrosine-protein kinase Yes	YES1	axon guidance;biological regulation;blood coagulation;carbohydrate transport;cell differentiation;cell migration;cell motility;cell surface receptor linked signaling pathway;cellular component movement;cellular developmental process;cellular macromolecule metabolic process;cellular metabolic process;cellular process;cellular protein metabolic process;cellular response to chemical stimulus;cellula…	adenyl nucleotide binding;adenyl ribonucleotide binding;ATP binding;binding;catalytic activity;enzyme binding;ion channel binding;kinase activity;non-membrane spanning protein tyrosine kinase activity;nucleotide binding;phosphotransferase activity, alcohol group as acceptor;protein binding;protein kinase activity;protein tyrosine kinase activity;purine nucleotide binding;purine ribonucleoside tri…	actin filament;adherens junction;anchoring junction;cell junction;cell part;cell-substrate adherens junction;cell-substrate junction;cytoplasm;cytoplasmic part;cytoskeletal part;cytosol;extracellular membrane-bounded organelle;extracellular organelle;extracellular region part;extracellular vesicular exosome;extrinsic to internal side of plasma membrane;extrinsic to membrane;extrinsic to plasma me…	Pkinase_Tyr;SH2;SH3_1	64	41	83.8	71.7	61.386	0	323.31	288740000000	6.81717	7.01126	6.02475	6.83686	7.70432	7.8781	7.23193	6.9104	7.59539	7.86528	7.61207	7.58107	6.841	6.59654	7.00877	6.86595	6.59933	6.59269	7.08292	6.7149	5.37654	4.97254	7.13525	7.02736	7.34719	7.33476	6.871	6.74655	6.9927	7.07558	6.90212	6.85805	6.62032	6.7862
D4Q8H0;Q9NYL2-2	D4Q8H0;Q9NYL2-2	Mitogen-activated protein kinase kinase kinase MLT	ZAK	activation of JUN kinase activity;activation of MAPK activity;activation of MAPKK activity;activation of protein kinase activity;biological regulation;cell cycle arrest;cell cycle checkpoint;cell cycle process;cell death;cell differentiation;cell proliferation;cellular component organization;cellular component organization at cellular level;cellular component organization or biogenesis;cellular c…	adenyl nucleotide binding;adenyl ribonucleotide binding;ATP binding;binding;catalytic activity;cation binding;ion binding;kinase activity;magnesium ion binding;MAP kinase kinase kinase activity;metal ion binding;molecular transducer activity;nucleotide binding;phosphotransferase activity, alcohol group as acceptor;protein kinase activity;protein serine/threonine kinase activity;purine nucleotide …	cell part;cytoplasm;intracellular membrane-bounded organelle;intracellular organelle;intracellular part;membrane-bounded organelle;nucleus;organelle	Pkinase_Tyr;SAM_1	33	4	62.2	10.3	51.582	0	323.31	60877000000	2.83941	3.16904	2.72223	3.05902	5.18104	5.23268	5.36331	5.48267	4.77167	4.96249	4.82552	5.11868	5.12922	5.12336	5.59754	5.35752	5.39617	5.32957	5.558	5.53733	4.87369	4.50161	5.3049	5.41742	5.30257	5.437	5.03422	4.98127	5.77084	5.63178	5.25116	5.51866	4.64394	4.98628
[truncated: 231 more columns]

## Sheet: Kinases_Imputed
Protein IDs	Majority protein IDs	Protein names	Gene names	GOBP name	GOMF name	GOCC name	Pfam	Peptides	Unique peptides	Sequence coverage [%]	Unique sequence coverage [%]	Mol. weight [kDa]	Q-value	Score	Intensity	Log2 transformed and normalized MaxQuant protein intensity values for protein and lipid kinases identified in the dataset. Normalization was performed by substracting the median of each data column (entire dataset with kinases and non-kinases) from each value in that column.
																1_50 µM_Rep. 1	1_50 µM_Rep. 2	2_50 µM_Rep. 1	2_50 µM_Rep. 2	3_50 µM_Rep. 1	3_50 µM_Rep. 2	4_50 µM_Rep. 1	4_50 µM_Rep. 2	5_50 µM_Rep. 1	5_50 µM_Rep. 2	6_50 µM_Rep. 1	6_50 µM_Rep. 2	7_50 µM_Rep. 1	7_50 µM_Rep. 2	8_50 µM_Rep. 1	8_50 µM_Rep. 2	9_50 µM_Rep. 1	9_50 µM_Rep. 2	10_50 µM_Rep. 1	10_50 µM_Rep. 2	11_ 50 µM_Rep. 1	11_50 µM_Rep. 2	12_50 µM_Rep. 1	12_50 µM_Rep. 2	13_50 µM_Rep. 1	13_50 µM_Rep. 2	14_50 µM_Rep. 1	14_50 µM_Rep. 2	15_50 µM_Rep. 1	15_50 µM_Rep. 2	16_50 µM_Rep. 1	16_50 µM_Rep. 2	17_50 µM_Rep. 1	17_50 µM_Rep. 2
Q2M2I8;Q2M2I8-2;E9PG46;A0A096LP60	Q2M2I8;Q2M2I8-2;E9PG46	AP2-associated protein kinase 1	AAK1	biological regulation;cellular component organization;cellular component organization or biogenesis;cellular macromolecule metabolic process;cellular membrane organization;cellular metabolic process;cellular process;cellular protein metabolic process;endocytosis;establishment of localization;macromolecule metabolic process;macromolecule modification;membrane invagination;membrane organization;met…	adenyl nucleotide binding;adenyl ribonucleotide binding;AP-2 adaptor complex binding;ATP binding;binding;catalytic activity;kinase activity;Notch binding;nucleotide binding;phosphotransferase activity, alcohol group as acceptor;protein binding;protein complex binding;protein kinase activity;protein serine/threonine kinase activity;purine nucleotide binding;purine ribonucleoside triphosphate bindi…	axon part;cell leading edge;cell part;cell projection part;clathrin-coated vesicle;coated pit;coated vesicle;cytoplasmic membrane-bounded vesicle;cytoplasmic part;cytoplasmic vesicle;extrinsic to membrane;extrinsic to plasma membrane;intracellular membrane-bounded organelle;intracellular organelle;intracellular part;membrane part;membrane-bounded organelle;membrane-bounded vesicle;organelle;plasm…	Pkinase	75	63	71.3	63.1	103.88	0	323.31	543000000000	6.94979	7.28132	6.1659	6.85233	8.33839	8.49514	8.13006	8.02285	8.25223	8.37391	8.25505	8.16834	7.75011	8.16946	8.29994	8.11835	8.10095	8.1402	7.77774	7.57692	7.32017	6.97072	8.09981	7.97183	8.10872	8.40132	7.68967	7.8266	8.01225	7.86497	7.91906	8.04442	8.22852	8.43394
P00519-2;P00519;R4GRW0	P00519-2;P00519	Tyrosine-protein kinase ABL1	ABL1	actin cytoskeleton organization;actin filament branching;actin filament organization;actin filament-based process;activated T cell proliferation;activation of immune response;alpha-beta T cell activation;alpha-beta T cell differentiation;anatomical structure development;anatomical structure morphogenesis;antigen receptor-mediated signaling pathway;astrocyte differentiation;autophagy;axon guidance…	actin binding;actin monomer binding;adenyl nucleotide binding;adenyl ribonucleotide binding;adenylyltransferase activity;ATP binding;binding;catalytic activity;cation binding;cytoskeletal protein binding;DNA binding;enzyme binding;ion binding;kinase activity;kinase binding;magnesium ion binding;manganese ion binding;metal ion binding;mitogen-activated protein kinase binding;nicotinate-nucleotide …	actin cytoskeleton;cell leading edge;cell part;cytoplasm;cytoplasmic part;cytoskeleton;cytosol;extrinsic to internal side of plasma membrane;extrinsic to membrane;extrinsic to plasma membrane;intracellular membrane-bounded organelle;intracellular non-membrane-bounded organelle;intracellular organelle;intracellular organelle part;intracellular part;membrane;membrane part;membrane-bounded organelle…	F_actin_bind;Pkinase_Tyr;SH2;SH3_1	43	34	49.5	44.4	124.95	0	323.31	14822000000	0.845573	1.48801	1.03672	1.1502	3.76509	3.70481	3.13687	3.53605	3.18996	3.10654	3.14965	3.36565	2.91514	3.40863	3.9023	3.47048	3.43377	3.07863	3.44687	3.26883	1.61854	1.83061	3.50995	3.57394	3.66809	2.94995	3.00751	2.89275	4.02855	3.03579	3.12506	3.20134	2.30134	2.68539
P42684-6;P42684-7;P42684-8	P42684-6;P42684-7;P42684-8	Abelson tyrosine-protein kinase 2	ABL2	actin cytoskeleton organization;actin filament bundle assembly;actin filament organization;actin filament-based process;alpha-beta T cell activation;alpha-beta T cell differentiation;anatomical structure morphogenesis;associative learning;astrocyte differentiation;axon guidance;behavior;Bergmann glial cell differentiation;biological regulation;calcium ion homeostasis;cation homeostasis;cell activ…	actin binding;actin filament binding;actin monomer binding;adenyl nucleotide binding;adenyl ribonucleotide binding;ATP binding;binding;catalytic activity;cation binding;cytoskeletal protein binding;ion binding;kinase activity;magnesium ion binding;manganese ion binding;metal ion binding;non-membrane spanning protein tyrosine kinase activity;nucleotide binding;phosphotransferase activity, alcohol …	actin cytoskeleton;cell part;cell projection;cell projection part;cytoplasmic part;cytoskeleton;cytosol;dendritic spine;extrinsic to internal side of plasma membrane;extrinsic to membrane;extrinsic to plasma membrane;intracellular non-membrane-bounded organelle;intracellular organelle;intracellular part;lamellipodium;membrane part;neuron projection;neuron spine;non-membrane-bounded organelle;orga…	F_actin_bind;Pkinase_Tyr;SH2;SH3_1	62	1	61.6	2.8	126.22	0	323.31	63954000000	3.94525	4.27293	3.37689	4.26618	5.16306	5.49319	5.38648	5.17017	4.95835	5.48141	4.70888	5.47487	4.88768	5.15511	5.44253	5.61869	5.20169	5.1261	5.05557	5.13798	4.55119	4.3204	5.19589	5.25874	5.05093	5.32231	4.60402	5.67997	5.19483	5.33683	5.02474	5.27778	3.09584	4.32369
Q04771;C9JHJ7;C9J1R3;F5GY91;E7EN07;G3V1W8;P37023;F8W0N2	Q04771	Activin receptor type-1	ACVR1	activin receptor signaling pathway;acute inflammatory response;ameboidal cell migration;anatomical structure development;anatomical structure formation involved in morphogenesis;anatomical structure maturation;anatomical structure morphogenesis;angiogenesis;artery development;atrial septum morphogenesis;atrial septum primum morphogenesis;biological regulation;blood circulation;blood vessel develo…	activin binding;activin receptor activity, type I;activin-activated receptor activity;adenyl nucleotide binding;adenyl ribonucleotide binding;ATP binding;binding;catalytic activity;cation binding;cytokine binding;enzyme binding;growth factor binding;hormone binding;identical protein binding;ion binding;kinase activity;kinase binding;metal ion binding;molecular transducer activity;nucleotide bindi…	activin receptor complex;apical part of cell;cell body;cell part;cell projection;cell surface;dendrite;integral to membrane;integral to plasma membrane;intrinsic to membrane;intrinsic to plasma membrane;macromolecular complex;membrane;membrane part;neuron projection;neuronal cell body;plasma membrane part;protein complex;receptor complex	Activin_recp;Pkinase;TGF_beta_GS	24	23	57.2	55.8	57.152	0	191.75	26587000000	1.04566	1.37466	-2.80947	-3.35054	4.72323	4.99369	0.395718	0.172907	4.50583	4.79692	4.6209	4.76124	-1.12051	0.426655	0.158752	-0.926191	0.661552	0.122322	1.18781	-0.826809	-3.81343	-4.11076	-0.683525	-0.857628	1.43419	2.87106	2.79526	1.90027	3.23506	2.79772	3.17515	3.03642	-1.25148	-1.55545
P36896-5;P36896;P36896-4;P36896-2;P36896-3;F5H5Q2	P36896-5;P36896;P36896-4;P36896-2;P36896-3	Activin receptor type-1B	ACVR1B	activin receptor signaling pathway;anatomical structure development;biological regulation;cell cycle process;cell surface receptor linked signaling pathway;cellular macromolecule metabolic process;cellular metabolic process;cellular process;cellular protein metabolic process;cellular response to stimulus;central nervous system development;chordate embryonic development;development of primary fema…	activin receptor activity, type I;activin-activated receptor activity;adenyl nucleotide binding;adenyl ribonucleotide binding;ATP binding;binding;catalytic activity;cation binding;enzyme binding;inhibin binding;ion binding;kinase activity;metal ion binding;molecular transducer activity;nucleotide binding;phosphotransferase activity, alcohol group as acceptor;protein binding;protein kinase activit…	activin receptor complex;cell part;cell surface;extracellular membrane-bounded organelle;extracellular organelle;extracellular region part;extracellular vesicular exosome;integral to membrane;integral to plasma membrane;intrinsic to membrane;intrinsic to plasma membrane;macromolecular complex;membrane;membrane part;membrane-bounded organelle;membrane-bounded vesicle;organelle;plasma membrane;plas…	Activin_recp;Pkinase;TGF_beta_GS	20	14	44.6	36.9	51.724	0	308.55	10972000000	1.16785	1.83445	-0.563606	0.436554	3.53636	3.42861	1.69321	0.637699	3.52702	3.47749	3.45817	3.42924	-2.07494	-1.10702	0.846973	-0.267157	0.854565	0.198538	-3.60014	-1.74044	-1.39624	-1.19317	-1.07266	-0.612236	2.05291	2.14129	1.66482	1.81273	2.65116	0.831596	2.08861	2.46049	-1.57961	-2.16118
G3V426;Q86TW2-2;Q86TW2;F8W9Q8;G3V3J2;Q86TW2-3	G3V426;Q86TW2-2;Q86TW2;F8W9Q8	Uncharacterized aarF domain-containing protein kinase 1	ADCK1		adenyl nucleotide binding;adenyl ribonucleotide binding;ATP binding;binding;catalytic activity;kinase activity;nucleotide binding;phosphotransferase activity, alcohol group as acceptor;protein kinase activity;protein serine/threonine kinase activity;purine nucleotide binding;purine ribonucleoside triphosphate binding;purine ribonucleotide binding;ribonucleotide binding;transferase activity;transf…	cell part;cytoplasmic part;extracellular region;intracellular membrane-bounded organelle;intracellular organelle;intracellular part;membrane-bounded organelle;mitochondrion;organelle	ABC1	3	3	21.8	21.8	30.159	0.0018762	4.7826	274530000	-4.33761	-5.00023	-4.37062	-4.01162	-1.51945	-1.24485	-4.16692	-4.51123	-1.96986	-0.993166	-1.48728	-1.86529	-4.3498	-4.28978	-3.37403	-5.21982	-3.23847	-3.12802	-3.09405	-3.74042	-3.65646	-3.9746	-2.13809	-3.44525	-2.67492	-3.56247	-5.56843	-4.15843	-2.81166	-5.50254	-3.60191	-2.92407	-2.63419	-3.06348
P31749;P31749-2;A0A087WY56;G3V2I6;G3V4I6;G3V3X1;G3V3K5;Q9Y243-2;Q9Y243;J3KTC6;F8VS91	P31749;P31749-2	RAC-alpha serine/threonine-protein kinase	AKT1	activation-induced cell death of T cells;aging;alcohol metabolic process;amine metabolic process;aminoglycan metabolic process;anatomical structure development;apoptosis;apoptotic mitochondrial changes;biological regulation;biosynthetic process;blood coagulation;blood vessel development;carbohydrate biosynthetic process;carbohydrate homeostasis;carbohydrate metabolic process;carbohydrate transpor…	14-3-3 protein binding;adenyl nucleotide binding;adenyl ribonucleotide binding;ATP binding;binding;catalytic activity;enzyme binding;enzyme regulator activity;identical protein binding;kinase activity;lipid binding;nitric-oxide synthase regulator activity;nucleotide binding;phosphatidylinositol binding;phosphatidylinositol-3,4,5-trisphosphate binding;phosphatidylinositol-3,4-bisphosphate binding;…	cell junction;cell part;cell-cell junction;cytoplasm;cytoplasmic part;cytoskeletal part;cytoskeleton;cytosol;Golgi apparatus;intracellular membrane-bounded organelle;intracellular non-membrane-bounded organelle;intracellular organelle;intracellular organelle part;intracellular part;membrane;membrane-bounded organelle;microtubule cytoskeleton;mitochondrion;non-membrane-bounded organelle;nuclear pa…	PH;Pkinase;Pkinase_C	23	18	62.7	50.6	55.686	0	323.31	20315000000	2.10777	2.1225	1.39069	2.22871	3.7263	3.50019	3.75947	3.29016	3.30534	3.3624	3.43366	3.29269	3.35139	3.3563	3.97846	3.92581	3.7616	3.46656	3.68718	4.34798	3.27876	3.21137	3.73132	3.72686	3.89648	3.84737	3.09116	3.44526	4.28859	4.19724	3.66679	3.73911	3.36481	3.76
P31751;P31751-2;M0R0P9;J3QKW1;J3QLS6;C9JHS6;C9JIJ1;J3KRI8;A8MX96;E7EVP8;M0QZK3;C9JC83;A0A0A0MRF1;C9J258;J3KSY8;J3QL45;C9JIF6;M0R283;J3KTP4;M0QZW8;M0R275	P31751;P31751-2;M0R0P9	RAC-beta serine/threonine-protein kinase	AKT2	alcohol metabolic process;apoptosis;biological regulation;biosynthetic process;carbohydrate biosynthetic process;carbohydrate metabolic process;carbohydrate transport;cell death;cell differentiation;cell surface receptor linked signaling pathway;cellular biosynthetic process;cellular carbohydrate biosynthetic process;cellular carbohydrate metabolic process;cellular component organization;cellular…	adenyl nucleotide binding;adenyl ribonucleotide binding;ATP binding;binding;catalytic activity;kinase activity;nucleotide binding;phosphotransferase activity, alcohol group as acceptor;protein kinase activity;protein serine/threonine kinase activity;purine nucleotide binding;purine ribonucleoside triphosphate binding;purine ribonucleotide binding;ribonucleotide binding;transferase activity;transf…	cell cortex;cell part;cell projection membrane;cell projection part;cytoplasmic part;cytosol;intracellular membrane-bounded organelle;intracellular organelle;intracellular organelle part;intracellular part;leading edge membrane;membrane;membrane part;membrane-bounded organelle;nuclear part;nucleoplasm;nucleus;organelle;organelle part;plasma membrane;plasma membrane part;ruffle membrane	PH;Pkinase;Pkinase_C	20	15	49.5	35.8	55.768	0	61.113	4202200000	-1.18674	-1.27986	-2.05029	-1.51894	1.73376	2.20703	1.51776	1.35837	1.34094	1.80251	0.828106	1.45838	0.263195	0.378788	1.1661	0.651024	1.03371	1.28435	0.963255	1.44484	0.861101	0.386053	0.777411	1.01743	0.904045	1.10256	-0.553764	-0.177347	1.13053	1.20593	0.276207	1.36591	1.11076	2.432
O14965;A3KFJ0;Q5QPD4;A3KFJ1;Q5QPD2;Q5QPD1;A3KFJ2;B4DXA6	O14965;A3KFJ0;Q5QPD4	Aurora kinase A	AURKA	anaphase-promoting complex-dependent proteasomal ubiquitin-dependent protein catabolic process;anatomical structure development;anterior/posterior axis specification;axis specification;biological regulation;catabolic process;cell cycle;cell cycle phase;cell cycle process;cell development;cell division;cellular catabolic process;cellular component assembly;cellular component assembly at cellular l…	adenyl nucleotide binding;adenyl ribonucleotide binding;ATP binding;binding;catalytic activity;enzyme binding;histone kinase activity;histone serine kinase activity;kinase activity;kinase binding;nucleotide binding;phosphotransferase activity, alcohol group as acceptor;protein binding;protein kinase activity;protein kinase binding;protein serine/threonine kinase activity;protein serine/threonine/…	axon hillock;axon part;cell part;cell projection part;centrosome;chromosomal part;chromosome passenger complex;chromosome, centromeric region;condensed chromosome, centromeric region;condensed nuclear chromosome, centromeric region;cytoplasmic part;cytoskeletal part;cytoskeleton;cytosol;female germ cell nucleus;germ cell nucleus;germinal vesicle;intracellular membrane-bounded organelle;intracellu…	Pkinase	44	40	90.6	87.6	45.809	0	323.31	323150000000	6.06733	6.00012	5.24715	6.00898	8.13269	8.12192	7.31295	7.39618	7.85319	8.17049	7.78238	7.90558	7.28599	7.58564	7.60178	7.60838	7.20838	7.38421	7.10646	7.68983	6.7196	6.31209	7.37065	7.50444	6.98375	7.62997	7.20055	7.46712	7.56516	7.5179	7.07629	7.51618	6.65669	7.03112
Q96GD4;Q96GD4-5;J3KTD6;Q96GD4-2;J3KT86;Q96GD4-3;J3KRF8;A0A0A0MSY3;Q5Y191;Q9UQB9-2;Q9UQB9-3;Q9UQB9;M0QYK8	Q96GD4;Q96GD4-5;J3KTD6;Q96GD4-2;J3KT86	Aurora kinase B	AURKB	abscission;aging;anaphase-promoting complex-dependent proteasomal ubiquitin-dependent protein catabolic process;anatomical structure development;attachment of spindle microtubules to chromosome;attachment of spindle microtubules to kinetochore;biological regulation;catabolic process;cell cycle;cell cycle checkpoint;cell cycle phase;cell cycle process;cell development;cell proliferation;cellular c…	adenyl nucleotide binding;adenyl ribonucleotide binding;ATP binding;binding;catalytic activity;cation binding;histone kinase activity;histone serine kinase activity;ion binding;kinase activity;metal ion binding;nucleotide binding;phosphotransferase activity, alcohol group as acceptor;protein kinase activity;protein serine/threonine kinase activity;protein serine/threonine/tyrosine kinase activity…	cell part;centrosome;chromocenter;chromosomal part;chromosome;chromosome passenger complex;chromosome, centromeric region;condensed chromosome;condensed chromosome, centromeric region;condensed nuclear chromosome, centromeric region;cytoplasm;cytoplasmic part;cytoskeletal part;cytosol;intracellular membrane-bounded organelle;intracellular non-membrane-bounded organelle;intracellular organelle;int…	Pkinase	41	7	85.5	11.6	39.31	0	323.31	29686000000	1.94062	1.91538	1.78146	2.00656	4.38742	4.18646	4.68007	4.11462	4.2599	4.26511	4.41399	4.05935	3.87727	4.20694	4.40369	4.2635	4.3296	4.1068	4.45469	4.41094	3.69898	3.36557	4.31308	4.26963	4.30794	4.35689	3.66605	3.93324	4.76776	4.26009	4.19127	4.25894	3.97545	3.9991
M0R0W6;P30530-2;P30530	M0R0W6;P30530-2;P30530	Tyrosine-protein kinase receptor UFO	AXL	anatomical structure development;anatomical structure morphogenesis;apoptotic cell clearance;biological adhesion;biological regulation;blood vessel remodeling;cell activation;cell adhesion;cell communication;cell differentiation;cell maturation;cell migration;cell morphogenesis;cell morphogenesis involved in differentiation;cell motility;cell surface receptor linked signaling pathway;cell-substra…	adenyl nucleotide binding;adenyl ribonucleotide binding;ATP binding;binding;catalytic activity;kinase activity;lipid binding;molecular transducer activity;nucleotide binding;phosphatidylserine binding;phospholipid binding;phosphotransferase activity, alcohol group as acceptor;protein kinase activity;protein tyrosine kinase activity;purine nucleotide binding;purine ribonucleoside triphosphate bind…	cell part;cell surface;extracellular membrane-bounded organelle;extracellular organelle;extracellular region part;extracellular space;extracellular vesicular exosome;host cell part;host cell surface;integral to membrane;integral to plasma membrane;intrinsic to membrane;intrinsic to plasma membrane;membrane;membrane part;membrane-bounded organelle;membrane-bounded vesicle;organelle;other organism …	fn3;Pkinase_Tyr;V-set	8	6	21.9	19.5	69.23	0	50.295	1346100000	-4.27552	-3.65665	-3.98988	-4.33846	-1.80871	-1.38479	-0.434217	-0.650028	-3.03895	-1.08353	-4.6827	0.286892	0.385115	0.575867	0.513987	0.674057	0.808891	0.391068	0.951122	0.689333	0.207481	0.222977	0.992847	0.387083	0.387209	0.28508	0.247087	-0.958838	0.741331	0.754538	0.609693	0.842279	-4.12817	-0.94153
Q9UIG0-2;Q9UIG0	Q9UIG0-2;Q9UIG0	Tyrosine-protein kinase BAZ1B	BAZ1B	anatomical structure morphogenesis;biological regulation;biosynthetic process;cellular biosynthetic process;cellular component organization;cellular component organization at cellular level;cellular component organization or biogenesis;cellular component organization or biogenesis at cellular level;cellular macromolecule biosynthetic process;cellular macromolecule metabolic process;cellular metab…	acetylcholine receptor regulator activity;adenyl nucleotide binding;adenyl ribonucleotide binding;ATP binding;binding;catalytic activity;cation binding;chromatin binding;histone acetyl-lysine binding;histone binding;histone kinase activity;ion binding;kinase activity;metal ion binding;non-membrane spanning protein tyrosine kinase activity;nucleotide binding;phosphotransferase activity, alcohol gr…	cell part;centromeric heterochromatin;chromatin;chromosomal part;chromosome;condensed chromosome;heterochromatin;intracellular membrane-bounded organelle;intracellular non-membrane-bounded organelle;intracellular organelle;intracellular organelle part;intracellular part;membrane-bounded organelle;non-membrane-bounded organelle;nucleus;organelle;organelle part	Bromodomain;PHD;WAC_Acf1_DNA_bd;WHIM1;WHIM2;WHIM3	12	12	9.3	9.3	170.45	0	21.644	1756900000	-1.10357	-0.058506	1.31694	0.215876	-0.104816	0.183422	-2.36912	-1.19354	0.0190105	0.047987	0.00660515	0.0625725	-0.389381	0.484869	0.368774	0.282166	-1.02622	-0.536774	-1.25594	-0.28775	-0.946945	-0.224728	-1.00218	-0.320759	-1.04168	-0.221926	-0.992851	-0.213045	-1.02649	-0.356525	-1.12271	-0.438704	-0.346531	-0.0229111
Q9NSY1;Q9NSY1-2;Q9NSY1-3;K4DI97;H0Y9P1	Q9NSY1;Q9NSY1-2;Q9NSY1-3;K4DI97	BMP-2-inducible protein kinase	BMP2K	biological regulation;regulation of biological process;regulation of biomineral tissue development;regulation of bone mineralization;regulation of developmental process;regulation of multicellular organismal development;regulation of multicellular organismal process;regulation of ossification	adenyl nucleotide binding;adenyl ribonucleotide binding;ATP binding;binding;catalytic activity;enzyme regulator activity;kinase activity;nucleotide binding;phosphatase regulator activity;phosphotransferase activity, alcohol group as acceptor;protein kinase activity;protein serine/threonine kinase activity;purine nucleotide binding;purine ribonucleoside triphosphate binding;purine ribonucleotide b…	cell part;intracellular organelle part;intracellular part;nuclear part;nucleoplasm;organelle part	BMP2K_C;Pkinase	49	44	48.8	47.4	129.17	0	323.31	74363000000	3.47937	4.13091	2.92537	3.85766	5.55249	5.593	5.80272	5.23743	5.39005	5.58199	5.44245	5.29648	4.92315	5.33186	5.55683	5.24235	5.67737	5.22125	5.79131	5.49074	4.80468	4.14393	5.47733	5.4157	5.49068	5.30996	4.65676	4.77452	6.00986	5.34571	5.45711	5.33625	5.19721	5.58299
P36894	P36894	Bone morphogenetic protein receptor type-1A	BMPR1A	anatomical structure arrangement;anatomical structure development;anatomical structure formation involved in morphogenesis;anatomical structure morphogenesis;anatomical structure regression;anterior/posterior pattern specification;appendage morphogenesis;axis specification;biological regulation;BMP signaling pathway;cartilage development;cell development;cell surface receptor linked signaling pat…	adenyl nucleotide binding;adenyl ribonucleotide binding;ATP binding;binding;catalytic activity;cation binding;identical protein binding;ion binding;kinase activity;metal ion binding;molecular transducer activity;nucleic acid binding transcription factor activity;nucleotide binding;phosphotransferase activity, alcohol group as acceptor;protein binding;protein dimerization activity;protein homodime…	cell body;cell part;cell projection;dendrite;external side of plasma membrane;integral to membrane;intrinsic to membrane;membrane;membrane part;neuron projection;neuronal cell body;plasma membrane;plasma membrane part	Activin_recp;Pkinase;TGF_beta_GS	9	8	23.9	22.6	60.197	0	165.78	1485900000	-4.6264	-3.5929	-4.19348	-4.75612	0.763592	1.51892	-3.53374	-4.05138	-0.668562	1.50748	0.127594	-0.378866	-4.8856	-4.353	-5.55973	-4.24596	-3.48912	-3.46539	-3.62646	-3.92701	-2.99672	-4.73323	-4.06502	-4.29022	-2.43469	-1.61866	-4.00024	-2.78192	-2.4161	-3.35024	-1.45678	-2.00841	-4.06236	-5.94996
Q8IWQ3-3;Q8IWQ3;Q8IWQ3-5;Q8IWQ3-2;Q8IWQ3-4;Q8IWQ3-6;H0YES6;K7EN26;E9PRY3;E9PPI2	Q8IWQ3-3;Q8IWQ3;Q8IWQ3-5;Q8IWQ3-2;Q8IWQ3-4;Q8IWQ3-6	Serine/threonine-protein kinase BRSK2	BRSK2	actin cytoskeleton organization;actin cytoskeleton reorganization;actin filament-based process;anatomical structure morphogenesis;apoptosis;apoptosis in response to endoplasmic reticulum stress;axonogenesis;biological regulation;cell cycle phase;cell cycle process;cell death;cell differentiation;cell division;cell part morphogenesis;cell projection morphogenesis;cell projection organization;cellu…	adenyl nucleotide binding;adenyl ribonucleotide binding;ATP binding;binding;catalytic activity;cation binding;ion binding;kinase activity;magnesium ion binding;metal ion binding;nucleotide binding;phosphotransferase activity, alcohol group as acceptor;protein kinase activity;protein serine/threonine kinase activity;purine nucleotide binding;purine ribonucleoside triphosphate binding;purine ribonu…	cell part;centrosome;cytoplasm;cytoplasmic part;cytoskeletal part;endoplasmic reticulum;intracellular membrane-bounded organelle;intracellular non-membrane-bounded organelle;intracellular organelle;intracellular organelle part;intracellular part;membrane-bounded organelle;microtubule organizing center;non-membrane-bounded organelle;nucleus;organelle;organelle part;perinuclear region of cytoplasm	Pkinase	10	9	22.3	21	74.74	0	182.87	2201500000	-1.58981	-0.946283	-4.72808	-1.27072	0.686626	0.775166	-1.20482	-1.08583	0.50609	0.510788	0.300266	0.385363	-1.50705	-2.6036	-1.24372	-1.87303	-2.48937	-2.09808	-1.82548	-1.32548	-1.57745	-1.80373	-1.27085	-0.182095	-1.59533	-1.30708	-0.360916	-0.839239	-0.384506	-0.627848	-0.659895	-1.10261	-2.32594	-1.46015
O43683-2;O43683-3;O43683	O43683-2;O43683-3;O43683	Mitotic checkpoint serine/threonine-protein kinase BUB1	BUB1	apoptosis;biological regulation;cell cycle;cell cycle checkpoint;cell cycle phase;cell cycle process;cell death;cell division;cell proliferation;cellular component organization;cellular component organization at cellular level;cellular component organization or biogenesis;cellular component organization or biogenesis at cellular level;cellular process;cellular response to stimulus;chromosome segr…	adenyl nucleotide binding;adenyl ribonucleotide binding;ATP binding;binding;catalytic activity;kinase activity;nucleotide binding;phosphotransferase activity, alcohol group as acceptor;protein kinase activity;protein serine/threonine kinase activity;purine nucleotide binding;purine ribonucleoside triphosphate binding;purine ribonucleotide binding;ribonucleotide binding;transferase activity;transf…	cell part;chromosomal part;condensed chromosome kinetochore;condensed chromosome outer kinetochore;condensed nuclear chromosome outer kinetochore;cytoplasm;cytoplasmic part;cytosol;intracellular non-membrane-bounded organelle;intracellular organelle;intracellular organelle part;intracellular part;kinetochore;macromolecular complex;membrane;non-membrane-bounded organelle;nuclear chromosome part;nu…	Mad3_BUB1_I;Pkinase	5	5	9.8	9.8	115.84	0.00076104	12.136	624260000	-3.55607	-3.51797	-4.50986	-4.14637	-1.40473	-3.06809	-4.30956	-0.809265	-4.13241	-4.13545	-2.53272	-2.68259	-0.779751	-0.231506	-0.500645	-4.89003	-0.978108	-0.837069	-0.963928	-0.0571156	0.381245	-2.51932	-1.17363	-0.256859	-1.07726	-1.60465	-3.76847	-0.271738	-1.69338	-0.739359	-0.825426	-0.601818	-4.17897	-3.90208
Q14012;C9JES6;H7C071;F8W6S9	Q14012	Calcium/calmodulin-dependent protein kinase type 1	CAMK1	biological regulation;cell cycle;cellular macromolecule metabolic process;cellular metabolic process;cellular process;cellular protein metabolic process;cellular response to stimulus;establishment of localization;establishment of localization in cell;intracellular transport;macromolecule metabolic process;macromolecule modification;metabolic process;negative regulation of binding;negative regulat…	adenyl nucleotide binding;adenyl ribonucleotide binding;ATP binding;binding;calmodulin-dependent protein kinase activity;catalytic activity;kinase activity;nucleotide binding;phosphotransferase activity, alcohol group as acceptor;protein kinase activity;protein serine/threonine kinase activity;purine nucleotide binding;purine ribonucleoside triphosphate binding;purine ribonucleotide binding;ribon…	cell part;cytoplasm;intracellular membrane-bounded organelle;intracellular organelle;intracellular part;membrane-bounded organelle;nucleus;organelle	Pkinase	21	18	68.1	60.8	41.337	0	88.655	6654600000	0.562239	0.265398	-0.295113	0.956011	1.98503	2.604	1.52098	1.44684	1.99461	2.21888	2.00921	2.09511	1.75797	1.90534	2.48879	1.63319	1.66319	1.44855	1.76055	1.49891	1.62651	1.30569	1.44744	1.39447	1.74161	1.43281	0.883425	0.85084	2.59989	1.82182	1.58111	1.51623	1.74166	2.21206
Q8IU85-2;Q8IU85;A0A087WUR6	Q8IU85-2;Q8IU85;A0A087WUR6	Calcium/calmodulin-dependent protein kinase type 1D	CAMK1D	biological regulation;defense response;inflammatory response;negative regulation of apoptosis;negative regulation of biological process;negative regulation of cell death;negative regulation of cellular process;negative regulation of programmed cell death;positive regulation of apoptosis;positive regulation of behavior;positive regulation of biological process;positive regulation of cell death;pos…	adenyl nucleotide binding;adenyl ribonucleotide binding;ATP binding;binding;calmodulin-dependent protein kinase activity;catalytic activity;kinase activity;nucleotide binding;phosphotransferase activity, alcohol group as acceptor;protein kinase activity;protein serine/threonine kinase activity;purine nucleotide binding;purine ribonucleoside triphosphate binding;purine ribonucleotide binding;ribon…	cell part;cytoplasm;intracellular membrane-bounded organelle;intracellular organelle;intracellular part;membrane-bounded organelle;nucleus;organelle	Pkinase	16	13	55.2	50.4	40.189	0	92.219	4125800000	-0.536812	0.285519	-1.59191	0.107782	1.14455	2.54932	1.05624	0.449852	0.84244	1.12429	1.51053	1.24617	0.52459	0.238504	1.04267	0.226212	1.29296	0.501224	0.578255	0.432251	0.284063	-0.14757	0.625172	1.18192	-0.547203	-0.0989361	0.754431	0.427038	1.43131	1.21067	0.975248	0.293598	1.48329	1.05463
Q9UQM7;Q9UQM7-2	Q9UQM7;Q9UQM7-2	Calcium/calmodulin-dependent protein kinase type II subunit alpha	CAMK2A	biological regulation;calcium ion transport;cation transport;cell communication;cell cycle process;cell surface receptor linked signaling pathway;cell-cell signaling;cellular macromolecule metabolic process;cellular metabolic process;cellular process;cellular protein metabolic process;cellular response to chemical stimulus;cellular response to cytokine stimulus;cellular response to heat;cellular …	adenyl nucleotide binding;adenyl ribonucleotide binding;ATP binding;binding;calmodulin binding;calmodulin-dependent protein kinase activity;catalytic activity;glutamate receptor binding;identical protein binding;kinase activity;nucleotide binding;phosphotransferase activity, alcohol group as acceptor;protein binding;protein dimerization activity;protein homodimerization activity;protein kinase ac…	cell junction;cell part;cytoplasmic part;cytoplasmic vesicle membrane;cytoplasmic vesicle part;cytosol;endocytic vesicle membrane;intracellular membrane-bounded organelle;intracellular organelle;intracellular organelle part;intracellular part;membrane;membrane-bounded organelle;mitochondrion;nuclear part;nucleoplasm;nucleus;organelle;organelle membrane;organelle part;plasma membrane;presynaptic m…	CaMKII_AD;Pkinase	19	1	36.8	7.1	54.087	0	31.215	13201000	-3.73164	-4.25551	-4.21332	-4.33947	-3.57706	-4.66321	-4.40498	-3.11539	-4.93098	-4.12031	-4.66154	-5.22321	-3.99704	-3.86168	-4.77384	-3.18994	-5.18869	-2.74639	-5.16848	-4.24306	-4.06458	-3.77202	-4.50141	-5.20214	-4.7066	-4.27005	-5.0167	-4.88531	-3.569	-4.59155	-4.24618	-3.43516	-3.68387	-5.89698
Q13554-4;Q13554-3;Q13554-5;Q13554-8;Q13554-2;Q13554-7;Q13554;Q13554-6;H7BXS4;H7C394;E9PBE8;E7ETC9;E7EQE4;E7ERS6;H7BZC6	Q13554-4;Q13554-3;Q13554-5;Q13554-8;Q13554-2;Q13554-7;Q13554;Q13554-6;H7BXS4	Calcium/calmodulin-dependent protein kinase type II subunit beta	CAMK2B	activation of meiosis involved in egg activation;biological regulation;calcium ion transport;cation transport;cell communication;cell cycle process;cell surface receptor linked signaling pathway;cell-cell signaling;cellular macromolecule metabolic process;cellular metabolic process;cellular process;cellular protein metabolic process;cellular response to chemical stimulus;cellular response to cyto…	adenyl nucleotide binding;adenyl ribonucleotide binding;ATP binding;binding;calmodulin-dependent protein kinase activity;catalytic activity;identical protein binding;kinase activity;nucleotide binding;phosphotransferase activity, alcohol group as acceptor;protein binding;protein dimerization activity;protein homodimerization activity;protein kinase activity;protein serine/threonine kinase activit…	cell part;cytoplasmic part;cytoplasmic vesicle membrane;cytoplasmic vesicle part;cytoskeletal part;cytosol;endocytic vesicle membrane;endoplasmic reticulum membrane;endoplasmic reticulum part;intracellular organelle part;intracellular part;membrane;membrane part;microtubule organizing center;nuclear part;nucleoplasm;organelle membrane;organelle part;plasma membrane;sarcoplasmic reticulum membrane…	CaMKII_AD;Pkinase	34	6	71	15.9	54.073	0	99.27	4648300000	-1.63019	0.0183868	-0.390108	0.11096	1.53734	1.77028	0.892237	0.562315	1.23252	1.44132	1.13624	1.41162	0.419128	1.07173	0.971239	0.913795	0.618122	0.862732	0.492769	0.390474	0.162664	-0.0506954	0.654102	-0.0875244	0.592575	0.589386	-0.175728	0.531527	1.63646	1.05398	-0.0273457	-0.033287	0.734564	1.54209
Q13557;D6R938;Q13557-8;H0Y9J2	Q13557;D6R938;Q13557-8	Calcium/calmodulin-dependent protein kinase type II subunit delta	CAMK2D	biological regulation;calcium ion homeostasis;calcium ion transport;calcium-mediated signaling;cation homeostasis;cation transport;cell communication;cell cycle process;cell growth;cell growth involved in cardiac muscle cell development;cell surface receptor linked signaling pathway;cell-cell signaling;cellular calcium ion homeostasis;cellular cation homeostasis;cellular chemical homeostasis;cell…	adenyl nucleotide binding;adenyl ribonucleotide binding;ATP binding;binding;calmodulin binding;calmodulin-dependent protein kinase activity;catalytic activity;channel inhibitor activity;channel regulator activity;cytoskeletal protein binding;identical protein binding;ion channel binding;ion channel inhibitor activity;kinase activity;nucleotide binding;phosphotransferase activity, alcohol group as…	axon part;calcium channel complex;cation channel complex;cell body;cell junction;cell part;cell projection part;cell-cell contact zone;cell-cell junction;cytoplasm;cytoplasmic part;cytoplasmic vesicle membrane;cytoplasmic vesicle part;cytosol;endocytic vesicle membrane;endoplasmic reticulum membrane;endoplasmic reticulum part;initial segment;intercalated disc;intracellular membrane-bounded organe…	CaMKII_AD;Pkinase	64	0	89	0	56.369	0	323.31	2297700000000	9.84477	9.97658	9.38785	10.0244	10.4857	10.7941	10.0476	9.83298	10.4139	10.6971	10.3944	10.3259	9.8651	10.1002	10.1926	9.99155	9.93273	9.86694	10.2761	10.2607	9.5516	9.09854	10.0517	10.0876	10.1228	10.266	9.87866	9.60806	10.1678	10.03	9.85736	10.0485	10.3887	10.4535
Q13555-6;Q13555-8;A0A0A0MT11;Q13555-2;Q13555;H0Y6G2	Q13555-6;Q13555-8;A0A0A0MT11;Q13555-2;Q13555;H0Y6G2	Calcium/calmodulin-dependent protein kinase type II subunit gamma	CAMK2G	anatomical structure development;biological regulation;calcium ion transport;cation transport;cell communication;cell cycle process;cell differentiation;cell surface receptor linked signaling pathway;cell-cell signaling;cellular component assembly;cellular component organization;cellular component organization or biogenesis;cellular developmental process;cellular macromolecule metabolic process;c…	adenyl nucleotide binding;adenyl ribonucleotide binding;ATP binding;binding;calcium-dependent protein serine/threonine phosphatase activity;calmodulin binding;calmodulin-dependent protein kinase activity;catalytic activity;hydrolase activity;hydrolase activity, acting on ester bonds;identical protein binding;kinase activity;nucleotide binding;phosphatase activity;phosphoprotein phosphatase activi…	cell part;cytoplasmic part;cytoplasmic vesicle membrane;cytoplasmic vesicle part;cytosol;endocytic vesicle membrane;endoplasmic reticulum membrane;endoplasmic reticulum part;intracellular organelle part;intracellular part;membrane;membrane part;nuclear part;nucleoplasm;organelle membrane;organelle part;plasma membrane;sarcoplasmic reticulum membrane;vesicle membrane	CaMKII_AD;Pkinase	57	0	90.8	0	65.241	0	323.31	494780000000	7.36387	7.59748	6.8868	7.5009	8.37363	8.65277	7.88906	7.65718	8.29921	8.4981	8.27538	8.43109	7.36107	7.70885	7.65936	7.55865	7.49442	7.3027	7.8181	7.74755	7.0681	6.64834	7.51952	7.62611	7.60113	7.80296	7.27383	7.38661	7.88329	7.65659	7.53809	7.60026	8.36663	8.59892
Q96RR4-3;Q96RR4-2;Q96RR4-7;Q96RR4;Q96RR4-5;Q96RR4-6;Q96RR4-4;F5GZ00;F5H4I7	Q96RR4-3;Q96RR4-2;Q96RR4-7;Q96RR4;Q96RR4-5;Q96RR4-6;Q96RR4-4;F5GZ00	Calcium/calmodulin-dependent protein kinase kinase 2	CAMKK2	biological regulation;calcium-mediated signaling;cellular macromolecule metabolic process;cellular metabolic process;cellular process;cellular protein metabolic process;cellular response to stimulus;intracellular protein kinase cascade;intracellular signal transduction;macromolecule metabolic process;macromolecule modification;MAPKKK cascade;metabolic process;peptidyl-amino acid modification;pept…	adenyl nucleotide binding;adenyl ribonucleotide binding;ATP binding;binding;calcium ion binding;calmodulin binding;calmodulin-dependent protein kinase activity;catalytic activity;cation binding;ion binding;kinase activity;metal ion binding;nucleotide binding;phosphotransferase activity, alcohol group as acceptor;protein binding;protein kinase activity;protein serine/threonine kinase activity;prot…	cell part;cell projection;cytoplasm;intracellular;intracellular membrane-bounded organelle;intracellular organelle;intracellular part;membrane-bounded organelle;nucleus;organelle	Pkinase	27	27	59	59	59.601	0	323.31	28950000000	-2.06747	-3.28185	-4.58161	-2.14926	-0.801632	-0.486984	5.68338	5.36399	-2.06865	-1.28795	-1.01295	-0.806959	5.03731	5.3504	5.59353	5.52131	5.38066	5.3163	5.24829	5.37546	4.71876	4.41608	5.19558	5.43379	5.39603	5.49687	5.06815	5.16135	5.59086	5.47083	5.48959	5.47138	-1.79279	-0.709894
Q9Y5S2;H0YLY0;H0Y6V3;Q6DT37	Q9Y5S2;H0YLY0	Serine/threonine-protein kinase MRCK beta	CDC42BPB	actin cytoskeleton organization;actin cytoskeleton reorganization;actin filament-based process;actomyosin structure organization;biological regulation;cell migration;cell motility;cellular component movement;cellular component organization;cellular component organization at cellular level;cellular component organization or biogenesis;cellular component organization or biogenesis at cellular level…	adenyl nucleotide binding;adenyl ribonucleotide binding;ATP binding;binding;catalytic activity;cation binding;ion binding;kinase activity;magnesium ion binding;metal ion binding;nucleotide binding;phosphotransferase activity, alcohol group as acceptor;protein kinase activity;protein serine/threonine kinase activity;purine nucleotide binding;purine ribonucleoside triphosphate binding;purine ribonu…	actomyosin;cell junction;cell leading edge;cell part;cell-cell junction;cytoplasm;cytoskeletal part;cytoskeleton;extracellular membrane-bounded organelle;extracellular organelle;extracellular region part;extracellular vesicular exosome;intracellular non-membrane-bounded organelle;intracellular organelle;intracellular organelle part;intracellular part;membrane;membrane-bounded organelle;membrane-b…	C1_1;CNH;DMPK_coil;PH;Pkinase;Pkinase_C	44	37	36.1	32.3	194.31	0	323.31	7521400000	-0.192074	0.742344	-0.581665	0.188122	2.89192	3.10552	-0.197655	-2.16602	3.42422	2.79175	2.68368	2.94294	-0.912815	-0.719383	-0.106009	-1.45956	-1.0452	-1.32751	0.317385	-0.432009	0.158808	-1.48951	-0.710192	-0.719284	-1.57819	-1.17881	-0.476561	-2.639	-0.241314	-1.43577	-2.00607	-1.60081	2.83571	3.19161
A0A024QZP7;P06493;P06493-2;A0A087WZZ9;E5RIU6	A0A024QZP7;P06493;P06493-2;A0A087WZZ9;E5RIU6	Cyclin-dependent kinase 1	CDK1	activation of immune response;activation of innate immune response;activation of MAPK activity;activation of MAPKK activity;activation of protein kinase activity;aging;anaphase-promoting complex-dependent proteasomal ubiquitin-dependent protein catabolic process;anatomical structure development;anatomical structure morphogenesis;apoptosis;axon guidance;biological regulation;biosynthetic process;c…	adenyl nucleotide binding;adenyl ribonucleotide binding;ATP binding;binding;catalytic activity;cyclin-dependent protein kinase activity;histone kinase activity;kinase activity;nucleotide binding;phosphotransferase activity, alcohol group as acceptor;protein kinase activity;protein serine/threonine kinase activity;purine nucleotide binding;purine ribonucleoside triphosphate binding;purine ribonucl…	cell part;centrosome;cytoplasm;cytoplasmic part;cytoskeletal part;cytosol;extracellular membrane-bounded organelle;extracellular organelle;extracellular region part;extracellular vesicular exosome;intracellular membrane-bounded organelle;intracellular non-membrane-bounded organelle;intracellular organelle;intracellular organelle part;intracellular part;macromolecular complex;membrane;membrane-bou…	Pkinase	33	30	89.9	82.2	34.081	0	323.31	60983000000	0.854492	1.27458	2.15871	2.14621	5.82898	6.05245	4.80274	4.70509	6.07651	5.92623	5.86842	5.80442	4.12176	4.45961	5.10245	4.90863	4.52625	4.66532	4.39269	4.01188	4.33901	3.80068	4.13768	4.22729	4.76043	4.96177	4.22043	4.47539	4.78705	5.03013	4.39883	4.6791	3.75186	3.67172
Q15131;F8W872;Q15131-5;Q15131-3;Q15131-2;H3BT74;Q15131-6;Q15131-4;Q15131-7;Q9UHL7;D6RA59;D6RHH3;D6REZ2	Q15131;F8W872;Q15131-5;Q15131-3;Q15131-2	Cyclin-dependent kinase 10	CDK10	biological regulation;negative regulation of biological process;negative regulation of cell proliferation;negative regulation of cellular process;positive regulation of biological process;positive regulation of cell communication;positive regulation of cellular process;positive regulation of intracellular protein kinase cascade;positive regulation of MAPKKK cascade;positive regulation of response…	adenyl nucleotide binding;adenyl ribonucleotide binding;ATP binding;binding;catalytic activity;cyclin-dependent protein kinase activity;kinase activity;nucleotide binding;phosphotransferase activity, alcohol group as acceptor;protein kinase activity;protein serine/threonine kinase activity;purine nucleotide binding;purine ribonucleoside triphosphate binding;purine ribonucleotide binding;ribonucle…		Pkinase	8	8	20	20	41.038	0	22.637	1172200000	-2.88678	-4.58288	-3.01064	-2.16985	-1.08911	-0.207636	-0.154293	-0.28442	-0.0643825	0.244638	-0.829065	-1.0177	-0.777517	-0.728521	-0.59277	0	-0.857788	-1.1959	-2.05515	-0.847574	-1.06094	-1.05316	-1.14378	-0.0471764	-0.118137	0.308432	-0.757959	-0.107132	-0.0628204	0.392466	0.0212994	0.0195713	-4.15806	-3.8653
A0A0D9SEI3;J3QKR5;B7ZVY7;A0A0D9SER5;A0A0D9SEN2;J3QR44;P21127-8;P21127-3;P21127-2;P21127;J3QR29;P21127-12;P21127-4;P21127-5;P21127-10;P21127-6;P21127-9;Q5QPR3;Q9UQ88-4;Q9UQ88-3;Q9UQ88-2;Q9UQ88;Q5QPR4;Q9UQ88-10;Q9UQ88-5;Q9UQ88-9;Q9UQ88-8;Q5QPQ9;E9PFJ2;A0A087WYI9;A0A087X1I0;J3KS35;E7ESP2	A0A0D9SEI3;J3QKR5;B7ZVY7;A0A0D9SER5;A0A0D9SEN2;J3QR44;P21127-8;P21127-3;P21127-2;P21127;J3QR29;P21127-12;P21127-4;P21127-5;P21127-10;P21127-6;P21127-9;Q5QPR3;Q9UQ88-4;Q9UQ88-3;Q9UQ88-2;Q9UQ88;Q5QPR4;Q9UQ88-10;Q9UQ88-5;Q9UQ88-9	Cyclin-dependent kinase 11B;Cyclin-dependent kinase 11A	CDK11A/B	apoptosis;biological regulation;cell cycle phase;cell cycle process;cell death;cell division;cell proliferation;cellular component organization;cellular component organization at cellular level;cellular component organization or biogenesis;cellular component organization or biogenesis at cellular level;cellular macromolecule metabolic process;cellular metabolic process;cellular process;cellular p…	adenyl nucleotide binding;adenyl ribonucleotide binding;ATP binding;binding;catalytic activity;cyclin-dependent protein kinase activity;kinase activity;nucleotide binding;phosphotransferase activity, alcohol group as acceptor;protein kinase activity;protein serine/threonine kinase activity;purine nucleotide binding;purine ribonucleoside triphosphate binding;purine ribonucleotide binding;ribonucle…	cell part;cytoplasm;intracellular membrane-bounded organelle;intracellular organelle;intracellular organelle part;intracellular part;membrane-bounded organelle;nuclear part;nucleoplasm;nucleus;organelle;organelle part	Pkinase	13	12	23.6	22.5	89.437	0	73.451	1657100000	-1.62193	-3.59642	3.27439	-2.76668	0.0610924	0.459686	-2.68707	-2.66082	-0.179415	-0.394552	1.15547	-0.630621	-4.3557	-2.51548	-4.05736	-1.57453	-4.12504	-0.854302	-2.39992	-3.27467	-1.39804	-2.29087	-2.93467	-1.63261	-1.63617	-1.87806	-1.31999	-0.192244	-1.94488	-2.0767	-3.92259	-4.11891	-0.841135	-0.101496
Q9NYV4-2;Q9NYV4;J3QSD7;Q9NYV4-3;A0A087X209;Q14004-2;Q14004;Q9BVE2;H0YLT2	Q9NYV4-2;Q9NYV4;J3QSD7;Q9NYV4-3	Cyclin-dependent kinase 12	CDK12	alternative nuclear mRNA splicing, via spliceosome;anatomical structure development;biological regulation;cellular macromolecule metabolic process;cellular metabolic process;cellular nitrogen compound metabolic process;cellular process;cellular protein metabolic process;developmental process;hemopoiesis;hemopoietic or lymphoid organ development;macromolecule metabolic process;macromolecule modifi…	adenyl nucleotide binding;adenyl ribonucleotide binding;ATP binding;binding;catalytic activity;cyclin binding;cyclin-dependent protein kinase activity;kinase activity;nucleotide binding;phosphotransferase activity, alcohol group as acceptor;protein binding;protein kinase activity;protein serine/threonine kinase activity;purine nucleotide binding;purine ribonucleoside triphosphate binding;purine r…	cell part;cyclin-dependent protein kinase holoenzyme complex;cytoplasm;cytoplasmic part;extracellular region part;extracellular space;Golgi apparatus;intracellular membrane-bounded organelle;intracellular non-membrane-bounded organelle;intracellular organelle;intracellular organelle part;intracellular part;macromolecular complex;membrane-bounded organelle;non-membrane-bounded organelle;nuclear bo…	Pkinase	19	18	21.1	20.6	163.23	0	78.119	2363200000	-3.16236	-1.41116	-3.55366	-1.79204	0.128315	0.977779	0.391947	0.0214882	0.0520515	0.902617	0.546648	1.1012	-0.493841	0.435711	-0.211624	0.107817	-1.53572	0.479176	-0.943771	-1.03043	-0.0594921	-0.747856	-0.193163	-0.31521	0.444557	0.151092	-0.0833759	0.453615	-0.686527	0.355108	-1.25191	-0.639692	0.122015	1.01173
Q00536-3;A0A087WZU2;Q00536;E5RGN0;H0YAZ9;H0YBX5;E5RJM2;E5RIY8;E5RIU4;E7EUK8;O94921-3;O94921-2;O94921;Q07002;Q07002-2;Q07002-3;E5RGV7;H0YC36;H0YC60;D6RA44;A0A0A0MSJ6	Q00536-3;A0A087WZU2;Q00536;E5RGN0	Cyclin-dependent kinase 16	CDK16	biological regulation;cell cycle process;cell division;cell projection organization;cell surface receptor linked signaling pathway;cellular component organization;cellular component organization at cellular level;cellular component organization or biogenesis;cellular component organization or biogenesis at cellular level;cellular macromolecule metabolic process;cellular metabolic process;cellular…	adenyl nucleotide binding;adenyl ribonucleotide binding;ATP binding;binding;catalytic activity;cyclin binding;cyclin-dependent protein kinase activity;kinase activity;nucleotide binding;phosphotransferase activity, alcohol group as acceptor;protein binding;protein kinase activity;protein serine/threonine kinase activity;purine nucleotide binding;purine ribonucleoside triphosphate binding;purine r…	cell junction;cell part;cell projection;clathrin-coated vesicle;coated vesicle;cyclin-dependent protein kinase holoenzyme complex;cytoplasm;cytoplasmic cyclin-dependent protein kinase holoenzyme complex;cytoplasmic membrane-bounded vesicle;cytoplasmic part;cytoplasmic vesicle;cytoskeleton;cytosol;extrinsic to internal side of plasma membrane;extrinsic to membrane;extrinsic to plasma membrane;intr…	Pkinase	11	1	27.3	2	56.375	0	23.021	821000000	-4.37144	-3.79217	-4.74289	-4.10166	-5.07739	-4.53929	-1.81966	-0.97497	-1.83808	-4.52963	-4.79413	-4.47544	-3.05062	-1.2387	-1.7391	-0.953724	-1.52682	-1.84865	-2.91857	-3.38489	-0.837193	-0.729487	-1.27748	-2.54787	-0.255568	-1.74137	-1.34923	0.654732	1.46232	-0.181335	-1.79363	-0.946241	-1.74847	-4.11695
P24941;G3V5T9;P24941-2;G3V317	P24941;G3V5T9;P24941-2	Cyclin-dependent kinase 2	CDK2	anaphase-promoting complex-dependent proteasomal ubiquitin-dependent protein catabolic process;biological regulation;biosynthetic process;blood coagulation;catabolic process;cation transport;cell cycle;cell cycle checkpoint;cell cycle phase;cell cycle process;cell division;cellular biosynthetic process;cellular catabolic process;cellular component organization;cellular component organization at c…	adenyl nucleotide binding;adenyl ribonucleotide binding;ATP binding;binding;catalytic activity;cation binding;cyclin binding;cyclin-dependent protein kinase activity;ion binding;kinase activity;metal ion binding;nucleotide binding;phosphotransferase activity, alcohol group as acceptor;protein binding;protein kinase activity;protein serine/threonine kinase activity;purine nucleotide binding;purine…	Cajal body;cell part;centrosome;chromosomal part;chromosome;chromosome, telomeric region;condensed chromosome;cyclin-dependent protein kinase holoenzyme complex;cytoplasm;cytoplasmic part;cytoskeletal part;cytosol;endosome;intracellular membrane-bounded organelle;intracellular non-membrane-bounded organelle;intracellular organelle;intracellular organelle part;intracellular part;macromolecular com…	Pkinase	52	15	100	35.6	33.929	0	323.31	352700000000	3.36088	4.15727	2.9941	4.07035	6.01146	6.15651	7.61395	7.77438	7.35713	7.39252	7.46403	7.4016	7.1768	7.39403	8.38482	8.33094	7.75689	7.63241	6.68605	6.77574	7.06344	6.75645	7.81519	7.81771	7.90395	8.06848	8.00344	8.20303	8.2063	8.39464	7.73663	7.93206	4.27141	4.12287
Q00526;K7ELV5;K7EJ83	Q00526;K7ELV5;K7EJ83	Cyclin-dependent kinase 3	CDK3	biological regulation;cell cycle phase;cell cycle process;cell division;cell proliferation;cellular component organization;cellular component organization at cellular level;cellular component organization or biogenesis;cellular component organization or biogenesis at cellular level;cellular process;G0 to G1 transition;G1/S transition of mitotic cell cycle;mitosis;nuclear division;organelle fissio…	adenyl nucleotide binding;adenyl ribonucleotide binding;ATP binding;binding;catalytic activity;cyclin-dependent protein kinase activity;kinase activity;nucleotide binding;phosphotransferase activity, alcohol group as acceptor;protein kinase activity;protein serine/threonine kinase activity;purine nucleotide binding;purine ribonucleoside triphosphate binding;purine ribonucleotide binding;ribonucle…		Pkinase	7	2	24.3	8.5	35.045	0.0061247	2.7499	6257100000	-0.132322	0.710531	-0.258541	0.700643	1.01653	2.27256	1.25373	1.59836	0.70042	1.97686	1.51952	2.07566	1.49612	2.34573	1.8291	1.79821	1.59221	1.38147	1.17058	2.11409	1.09412	-0.0438137	1.21492	1.88739	1.67153	2.42317	1.61086	1.35841	1.48139	2.08408	1.61776	1.65883	1.22386	2.73651
F8VZ51;P11802-2;P11802	F8VZ51;P11802-2;P11802	Cyclin-dependent kinase 4	CDK4	anatomical structure development;anatomical structure morphogenesis;biological regulation;cell cycle;cell cycle process;cell division;cellular component organization;cellular component organization at cellular level;cellular component organization or biogenesis;cellular component organization or biogenesis at cellular level;cellular macromolecule metabolic process;cellular metabolic process;cellu…	adenyl nucleotide binding;adenyl ribonucleotide binding;ATP binding;binding;catalytic activity;cyclin binding;cyclin-dependent protein kinase activity;cyclin-dependent protein kinase regulator activity;enzyme regulator activity;kinase activity;kinase regulator activity;nucleotide binding;phosphotransferase activity, alcohol group as acceptor;protein binding;protein kinase activity;protein kinase …	cell junction;cell part;cell-cell junction;chromatin;chromosomal part;cyclin-dependent protein kinase holoenzyme complex;cytoplasmic part;cytosol;intracellular membrane-bounded organelle;intracellular non-membrane-bounded organelle;intracellular organelle;intracellular organelle part;intracellular part;macromolecular complex;membrane;membrane-bounded organelle;non-membrane-bounded organelle;nucle…	Pkinase	2	1	21.2	17.3	23.455	0.0040816	3.3427	4293300	-3.85499	-3.71292	-4.42905	-4.41885	-4.50671	-4.15445	-3.40711	-4.79509	-4.67308	-4.06852	-2.91332	-4.55507	-4.51637	-4.54038	-4.60323	-4.12336	-3.8012	-5.04582	-3.94476	-3.55727	-4.3095	-4.21565	-4.18257	-3.5204	-3.22696	-3.31246	-5.14612	-5.00735	-4.66843	-4.02645	-4.41494	-3.22333	-3.73564	-2.65382
Q00535;Q00535-2;F8VXD2;F8VYH9;F8VZZ0;F8VTV8;F8VWX7;Q00534;Q96Q40-2;Q96Q40-4;Q96Q40-3;Q96Q40-5;Q96Q40	Q00535;Q00535-2	Cyclin-dependent-like kinase 5	CDK5	actin cytoskeleton organization;actin filament-based process;adult behavior;anatomical structure development;anatomical structure formation involved in morphogenesis;anatomical structure morphogenesis;apoptosis;associative learning;astrocyte development;axon extension;axon guidance;behavior;behavioral response to cocaine;biological adhesion;biological regulation;blood coagulation;calcium ion impo…	acetylcholine receptor activator activity;acetylcholine receptor regulator activity;adenyl nucleotide binding;adenyl ribonucleotide binding;ATP binding;binding;catalytic activity;cation binding;cyclin binding;cyclin-dependent protein kinase activity;ErbB-2 class receptor binding;ErbB-3 class receptor binding;ion binding;kinase activity;metal ion binding;nucleotide binding;phosphotransferase activ…	axon;cell body;cell junction;cell part;cell projection;cell projection part;centrosome;cyclin-dependent protein kinase 5 holoenzyme complex;cyclin-dependent protein kinase holoenzyme complex;cytoplasm;cytoplasmic part;cytoskeletal part;cytoskeleton;cytosol;dendrite;filopodium;growth cone;intracellular membrane-bounded organelle;intracellular non-membrane-bounded organelle;intracellular organelle;…	Pkinase	42	41	98.3	98.3	33.304	0	323.31	509170000000	4.97372	5.31265	4.99081	5.75178	6.53606	6.59611	8.85137	8.6377	7.64116	7.77298	7.62906	7.73771	8.39862	8.60714	9.00639	9.10466	8.92319	8.6716	8.59648	8.34982	8.03624	7.60018	8.83865	8.67627	8.8593	8.85634	8.76594	8.63632	9.05091	9.02118	8.75083	8.84923	5.4986	5.94591
P50613;D6R9G1;D6RAD4;D6REC6;D6RFL0;D6RGG9;D6RI01;D6R9Z2;D6RF14;D6RIG9;A0A0D9SFW9;Q9C098	P50613;D6R9G1;D6RAD4	Cyclin-dependent kinase 7	CDK7	androgen receptor signaling pathway;biological regulation;biosynthetic process;catabolic process;cell cycle;cell cycle arrest;cell cycle process;cell division;cell proliferation;cellular biosynthetic process;cellular catabolic process;cellular macromolecule biosynthetic process;cellular macromolecule catabolic process;cellular macromolecule metabolic process;cellular metabolic process;cellular ni…	adenyl nucleotide binding;adenyl ribonucleotide binding;androgen receptor binding;ATP binding;ATPase activity;ATPase activity, coupled;binding;catalytic activity;cyclin-dependent protein kinase activity;DNA-dependent ATPase activity;hormone receptor binding;hydrolase activity;hydrolase activity, acting on acid anhydrides;hydrolase activity, acting on acid anhydrides, in phosphorus-containing anhy…	cell part;cytoplasm;cytoplasmic part;holo TFIIH complex;intracellular membrane-bounded organelle;intracellular organelle;intracellular organelle part;intracellular part;macromolecular complex;membrane-bounded organelle;mitochondrion;nuclear part;nucleoplasm;nucleoplasm part;nucleus;organelle;organelle part;perinuclear region of cytoplasm;protein complex;transcription factor complex	Pkinase	7	7	31.8	31.8	39.038	0	84.747	5452600000	-4.22677	-3.4959	-2.8004	-2.87834	2.01746	2.08801	0.682133	0.528393	1.061	1.24712	0.717943	0.706146	-0.366861	0.522535	1.2543	0.538826	0.299007	1.08563	-0.95504	-0.215801	1.18977	1.12099	-0.277725	0.727362	1.19223	1.78147	-0.262442	1.33069	1.51075	2.01541	0.833592	1.07974	-1.0018	-0.384195
P50750;P50750-2;X6RE90	P50750;P50750-2	Cyclin-dependent kinase 9	CDK9	biological regulation;biosynthetic process;cell proliferation;cell surface receptor linked signaling pathway;cellular biosynthetic process;cellular macromolecule biosynthetic process;cellular macromolecule metabolic process;cellular metabolic process;cellular nitrogen compound metabolic process;cellular process;cellular protein metabolic process;cellular response to chemical stimulus;cellular res…	adenyl nucleotide binding;adenyl ribonucleotide binding;ATP binding;binding;catalytic activity;chromatin binding;cyclin-dependent protein kinase activity;DNA binding;kinase activity;nucleic acid binding;nucleotide binding;phosphotransferase activity, alcohol group as acceptor;protein kinase activity;protein serine/threonine kinase activity;purine nucleotide binding;purine ribonucleoside triphosph…	carboxy-terminal domain protein kinase complex;cell part;cytoplasm;intracellular membrane-bounded organelle;intracellular organelle;intracellular organelle part;intracellular part;macromolecular complex;membrane;membrane-bounded organelle;nuclear body;nuclear part;nucleoplasm;nucleoplasm part;organelle;organelle part;PML body;positive transcription elongation factor complex b;protein complex;tran…	Pkinase	17	16	59.4	57.3	42.777	0	178.15	10232000000	-4.3678	-0.313515	-4.05986	-3.14296	1.03455	1.76694	3.7523	3.66695	1.19857	1.56691	1.17431	1.59074	2.71516	3.57449	3.63549	3.80655	3.43074	3.2521	2.54927	3.03066	2.97095	2.9241	2.67262	3.05894	3.35031	4.02835	3.45544	3.45839	3.93156	3.97047	2.81036	3.1869	1.04433	1.42467
E7EPP6;O14757-2;O14757;J3KN87;O14757-3;E9PPA5;A0A087WY91;E9PKQ3	E7EPP6;O14757-2;O14757;J3KN87;O14757-3	Serine/threonine-protein kinase Chk1	CHEK1	aging;biological regulation;biosynthetic process;cell aging;cell cycle checkpoint;cell cycle process;cellular biosynthetic process;cellular component organization;cellular component organization at cellular level;cellular component organization or biogenesis;cellular component organization or biogenesis at cellular level;cellular macromolecule biosynthetic process;cellular macromolecule metabolic…	adenyl nucleotide binding;adenyl ribonucleotide binding;ATP binding;binding;catalytic activity;histone kinase activity;histone kinase activity (H3-T11 specific);histone threonine kinase activity;kinase activity;nucleotide binding;phosphotransferase activity, alcohol group as acceptor;protein kinase activity;protein serine/threonine kinase activity;purine nucleotide binding;purine ribonucleoside t…	cell part;centrosome;chromatin;chromosomal part;chromosome;condensed chromosome;condensed nuclear chromosome;cytoplasmic part;cytoskeletal part;cytosol;extracellular region part;extracellular space;intracellular membrane-bounded organelle;intracellular non-membrane-bounded organelle;intracellular organelle;intracellular organelle part;intracellular part;membrane-bounded organelle;microtubule orga…	Pkinase	10	10	28.3	28.3	55.517	0	85.393	2586000000	-2.58343	-1.74495	-2.59778	-5.44156	1.59112	1.37607	-0.411852	0.170311	1.08473	1.68503	0.804125	1.44879	-0.979445	-0.421217	-0.0697632	-0.395214	-1.01971	-0.305372	-1.77389	-0.537399	-1.64085	-1.44304	-1.519	-2.02411	-1.26213	-1.51851	-1.02951	-0.973494	-0.854504	0.0885563	-2.79414	-1.04589	1.22081	1.35048
O96017;O96017-9;O96017-13;O96017-4;H0Y820;B7ZBF6	O96017;O96017-9;O96017-13;O96017-4;H0Y820	Serine/threonine-protein kinase Chk2	CHEK2	aging;biological regulation;biosynthetic process;catabolic process;cell aging;cell cycle checkpoint;cell cycle process;cell division;cellular biosynthetic process;cellular catabolic process;cellular component assembly;cellular component assembly at cellular level;cellular component organization;cellular component organization at cellular level;cellular component organization or biogenesis;cellula…	adenyl nucleotide binding;adenyl ribonucleotide binding;ATP binding;binding;catalytic activity;cation binding;enzyme binding;identical protein binding;ion binding;kinase activity;kinase binding;metal ion binding;nucleotide binding;phosphotransferase activity, alcohol group as acceptor;protein binding;protein dimerization activity;protein homodimerization activity;protein kinase activity;protein k…	cell part;cytoplasmic part;Golgi apparatus;intracellular membrane-bounded organelle;intracellular organelle;intracellular organelle part;intracellular part;membrane-bounded organelle;nuclear body;nuclear part;nucleoplasm;nucleoplasm part;organelle;organelle part;PML body	FHA;Pkinase	14	1	36.3	3.5	60.914	0	234.87	4474100000	0.823738	1.22929	-0.746418	0.713963	1.24419	1.21094	1.19545	0.994465	1.08073	1.48364	0.743729	0.940167	0.953901	1.55173	1.25711	1.17637	1.2454	0.541142	0.961992	0.784256	0.83938	0.328222	0.740494	0.251263	1.31343	-0.0685368	0.476303	0.803154	1.69146	1.27445	0.711559	0.797947	1.31255	1.69063
P49759;P49759-3;A0A087WVK0;B8ZZR0;F8WBF5;P49759-2	P49759;P49759-3;A0A087WVK0;B8ZZR0	Dual specificity protein kinase CLK1	CLK1	biological regulation;cell proliferation;cellular macromolecule metabolic process;cellular metabolic process;cellular process;cellular protein metabolic process;macromolecule metabolic process;macromolecule modification;metabolic process;peptidyl-amino acid modification;peptidyl-serine modification;peptidyl-serine phosphorylation;peptidyl-threonine modification;peptidyl-threonine phosphorylation;…	adenyl nucleotide binding;adenyl ribonucleotide binding;ATP binding;binding;catalytic activity;kinase activity;non-membrane spanning protein tyrosine kinase activity;nucleotide binding;phosphotransferase activity, alcohol group as acceptor;protein kinase activity;protein serine/threonine kinase activity;protein serine/threonine/tyrosine kinase activity;protein tyrosine kinase activity;purine nucl…	cell part;cytoplasm;intracellular membrane-bounded organelle;intracellular organelle;intracellular part;membrane-bounded organelle;nucleus;organelle	Pkinase	21	19	38.6	37	57.29	0	160.78	16194000000	0.729221	1.21545	-0.0779343	0.737928	3.55163	3.97531	2.03643	2.31504	3.56768	3.78334	3.37624	3.45228	0.594492	1.98898	2.28795	2.83255	1.8874	2.55573	2.73075	2.55462	2.36809	1.92941	2.69949	2.73152	3.09198	3.04045	2.08921	2.29404	3.22648	2.96174	2.34845	2.72014	2.37336	3.11588
B1AVT0;P49760-3;P49760;P49760-2	B1AVT0;P49760-3;P49760	Dual specificity protein kinase CLK2	CLK2	biological regulation;cellular macromolecule metabolic process;cellular metabolic process;cellular process;cellular protein metabolic process;macromolecule metabolic process;macromolecule modification;metabolic process;negative regulation of biological process;negative regulation of biosynthetic process;negative regulation of carbohydrate metabolic process;negative regulation of cellular biosynth…	adenyl nucleotide binding;adenyl ribonucleotide binding;ATP binding;binding;catalytic activity;kinase activity;nucleotide binding;phosphotransferase activity, alcohol group as acceptor;protein kinase activity;protein serine/threonine kinase activity;protein serine/threonine/tyrosine kinase activity;protein tyrosine kinase activity;purine nucleotide binding;purine ribonucleoside triphosphate bindi…	cell part;intracellular membrane-bounded organelle;intracellular organelle;intracellular organelle part;intracellular part;membrane-bounded organelle;nuclear body;nuclear part;nuclear speck;nucleoplasm;nucleoplasm part;nucleus;organelle;organelle part	Pkinase	19	18	40.6	39	59.874	0	239.41	26172000000	1.38068	2.28416	1.1139	1.54649	4.15904	4.14503	2.99117	2.97974	3.83174	3.97298	3.78619	3.96576	2.03471	2.30975	4.31743	3.89137	2.92158	3.35051	3.3498	3.22952	2.36643	2.15653	3.17594	3.42687	4.40233	4.39635	3.60303	3.95048	4.49203	4.19022	3.40086	3.32916	2.68002	2.75769
P49761-1;P49761;P49761-3;H3BQG1;H3BRE4;H3BUL5;H3BVF8;H3BNC8;H3BNQ5;H3BRW2	P49761-1;P49761;P49761-3	Dual specificity protein kinase CLK3	CLK3	biological regulation;cellular macromolecule metabolic process;cellular metabolic process;cellular process;cellular protein metabolic process;macromolecule metabolic process;macromolecule modification;metabolic process;phosphate-containing compound metabolic process;phosphorus metabolic process;phosphorylation;primary metabolic process;protein autophosphorylation;protein metabolic process;protein…	adenyl nucleotide binding;adenyl ribonucleotide binding;ATP binding;binding;catalytic activity;kinase activity;nucleotide binding;phosphotransferase activity, alcohol group as acceptor;protein kinase activity;protein serine/threonine kinase activity;protein serine/threonine/tyrosine kinase activity;protein tyrosine kinase activity;purine nucleotide binding;purine ribonucleoside triphosphate bindi…	acrosomal vesicle;cell part;cytoplasmic membrane-bounded vesicle;cytoplasmic part;cytoplasmic vesicle;cytoskeleton;intermediate filament cytoskeleton;intracellular membrane-bounded organelle;intracellular non-membrane-bounded organelle;intracellular organelle;intracellular organelle part;intracellular part;membrane;membrane-bounded organelle;membrane-bounded vesicle;non-membrane-bounded organelle…	Pkinase	19	19	40.4	40.4	58.588	0	206	13875000000	1.34451	1.95896	1.14093	1.94623	2.83278	3.05577	3.13789	2.77024	2.85661	3.02185	2.90191	2.71719	2.19777	2.90284	3.02841	3.3576	2.80229	3.35017	2.39874	3.03011	2.00224	2.30841	2.30657	2.23057	2.87415	3.35467	2.25786	2.58244	3.44149	3.35476	2.50212	3.05023	1.76529	1.44965
Q9HAZ1;B7ZL31;A0A087WX74	Q9HAZ1;B7ZL31;A0A087WX74	Dual specificity protein kinase CLK4	CLK4	biological regulation;cellular macromolecule metabolic process;cellular metabolic process;cellular process;cellular protein metabolic process;macromolecule metabolic process;macromolecule modification;metabolic process;phosphate-containing compound metabolic process;phosphorus metabolic process;phosphorylation;primary metabolic process;protein autophosphorylation;protein metabolic process;protein…	adenyl nucleotide binding;adenyl ribonucleotide binding;ATP binding;binding;catalytic activity;kinase activity;nucleotide binding;phosphotransferase activity, alcohol group as acceptor;protein kinase activity;protein serine/threonine kinase activity;protein serine/threonine/tyrosine kinase activity;protein tyrosine kinase activity;purine nucleotide binding;purine ribonucleoside triphosphate bindi…	cell part;intracellular membrane-bounded organelle;intracellular organelle;intracellular part;membrane-bounded organelle;nucleus;organelle	Pkinase	3	1	7.9	3.3	57.491	0.0019355	5.6352	239060000	-3.85768	-3.48745	-2.24491	-4.18823	-2.30572	-2.26064	-3.06363	-4.09891	-2.02266	-2.53737	-4.59433	-1.86582	-3.84958	-3.19536	-4.68144	-4.78661	-3.0959	-3.42718	-2.90008	-2.90201	-3.13703	-4.14966	-2.50518	-2.87304	-1.96027	-2.21163	-2.4147	-4.191	-2.18015	-4.39606	-3.41213	-3.03615	-3.7451	-2.39432
P41240;H3BUM9;H3BN15;K7ENL8;K7ES68;K7EQY5;A0A087WUR1;P42679-3;P42679;P42679-2	P41240	Tyrosine-protein kinase CSK	CSK	activation of immune response;adherens junction organization;anatomical structure development;anatomical structure morphogenesis;antigen receptor-mediated signaling pathway;biological regulation;blood coagulation;brain development;cell activation;cell differentiation;cell junction organization;cell migration;cell motility;cell proliferation;cell surface receptor linked signaling pathway;cell-cell…	adenyl nucleotide binding;adenyl ribonucleotide binding;ATP binding;binding;catalytic activity;identical protein binding;kinase activity;non-membrane spanning protein tyrosine kinase activity;nucleotide binding;phosphotransferase activity, alcohol group as acceptor;protein binding;protein C-terminus binding;protein kinase activity;protein tyrosine kinase activity;purine nucleotide binding;purine …	cell junction;cell part;cell-cell junction;cytoplasm;cytoplasmic part;cytosol;extracellular membrane-bounded organelle;extracellular organelle;extracellular region part;extracellular vesicular exosome;extrinsic to internal side of plasma membrane;extrinsic to membrane;extrinsic to plasma membrane;intracellular part;membrane;membrane part;membrane raft;membrane-bounded organelle;membrane-bounded v…	Pkinase_Tyr;SH2;SH3_1	82	71	98.4	90.4	50.704	0	323.31	2027800000000	9.12692	9.16851	8.66869	9.18282	10.0757	10.269	10.4596	10.1333	10.0803	10.3674	9.96316	10.0734	10.1715	10.3653	10.3583	10.4528	10.4961	10.1528	10.3173	10.3894	9.7595	9.66608	10.2939	10.3644	10.2309	10.4256	10.072	10.0027	10.5239	10.4448	10.1817	10.3391	9.87385	10.1013
P48729-3;P48729;P48729-2;E5RG27;D6RGE5;H0Y9X2;U3KQK7;Q8N752;U3KPX3;U3KQ83	P48729-3;P48729;P48729-2	Casein kinase I isoform alpha	CSNK1A1	anatomical structure morphogenesis;biological regulation;cell cycle phase;cell cycle process;cell division;cell morphogenesis;cell surface receptor linked signaling pathway;cellular component morphogenesis;cellular component organization;cellular component organization at cellular level;cellular component organization or biogenesis;cellular component organization or biogenesis at cellular level;c…	adenyl nucleotide binding;adenyl ribonucleotide binding;ATP binding;binding;catalytic activity;kinase activity;nucleotide binding;phosphotransferase activity, alcohol group as acceptor;protein kinase activity;protein serine/threonine kinase activity;purine nucleotide binding;purine ribonucleoside triphosphate binding;purine ribonucleotide binding;ribonucleotide binding;transferase activity;transf…	cell part;cell projection;centrosome;chromosomal part;cilium;condensed chromosome kinetochore;cytoplasm;cytoplasmic part;cytoskeletal part;cytosol;intracellular membrane-bounded organelle;intracellular non-membrane-bounded organelle;intracellular organelle;intracellular organelle part;intracellular part;kinetochore;macromolecular complex;membrane;membrane-bounded organelle;microtubule organizing …	Pkinase	18	8	56.6	28.6	37.567	0	202.42	15250000000	2.23176	2.34366	0.657537	1.37353	2.43643	2.5952	2.33987	3.09893	3.17266	2.10705	2.56782	2.78431	2.73381	2.96644	3.29228	3.3344	2.99164	3.0935	2.84967	2.82958	2.51216	2.08283	2.45139	2.34419	2.79987	3.11919	2.41609	2.74782	2.76154	3.48888	2.74217	3.07375	3.26919	3.10642
H7BYT1;P48730-2;P48730;J3QQI9;B4DLF1;H0Y2N6;J3KRM8	H7BYT1;P48730-2;P48730	Casein kinase I isoform delta	CSNK1D	biological regulation;cell cycle;cell cycle process;cell surface receptor linked signaling pathway;cellular component assembly;cellular component assembly at cellular level;cellular component organization;cellular component organization at cellular level;cellular component organization or biogenesis;cellular component organization or biogenesis at cellular level;cellular macromolecule metabolic p…	adenyl nucleotide binding;adenyl ribonucleotide binding;ATP binding;binding;catalytic activity;kinase activity;nucleotide binding;peptide binding;phosphotransferase activity, alcohol group as acceptor;protein kinase activity;protein serine/threonine kinase activity;purine nucleotide binding;purine ribonucleoside triphosphate binding;purine ribonucleotide binding;ribonucleotide binding;tau-protein…	cell part;centrosome;cytoplasmic part;cytoskeletal part;cytosol;Golgi apparatus;intracellular membrane-bounded organelle;intracellular non-membrane-bounded organelle;intracellular organelle;intracellular organelle part;intracellular part;macromolecular complex;membrane;membrane-bounded organelle;microtubule;microtubule organizing center;non-membrane-bounded organelle;nucleus;organelle;organelle p…	Pkinase	14	4	55.5	17.3	49.064	0	147.84	1764600000	-2.62688	-2.10125	-2.64585	-3.7662	-1.27291	-0.76652	1.26539	0.71118	-1.52612	-0.201963	-0.548069	-0.411262	0.040987	0.396723	0.925058	0.822788	0.83164	1.0269	0.578844	0.846964	0.929369	0.324047	0.516901	0.777376	0.598383	0.721914	-0.124826	-0.0539036	1.36997	1.00698	0.207953	1.48504	-0.767214	-0.417696
P49674;B0QY35;B0QY34;H0Y645;B0QY36;H0Y682;H0Y5S9	P49674;B0QY35;B0QY34;H0Y645;B0QY36	Casein kinase I isoform epsilon	CSNK1E	biological regulation;cell cycle;cell cycle process;cell surface receptor linked signaling pathway;cellular component organization;cellular component organization at cellular level;cellular component organization or biogenesis;cellular component organization or biogenesis at cellular level;cellular localization;cellular macromolecule localization;cellular macromolecule metabolic process;cellular …	adenyl nucleotide binding;adenyl ribonucleotide binding;ATP binding;binding;catalytic activity;kinase activity;nucleotide binding;phosphotransferase activity, alcohol group as acceptor;protein kinase activity;protein serine/threonine kinase activity;purine nucleotide binding;purine ribonucleoside triphosphate binding;purine ribonucleotide binding;ribonucleotide binding;transferase activity;transf…	cell part;cytoplasm;cytoplasmic part;cytosol;intracellular membrane-bounded organelle;intracellular organelle;intracellular part;macromolecular complex;membrane-bounded organelle;nucleus;organelle;ribonucleoprotein complex	Pkinase	13	3	49.3	10.1	47.315	0.0041104	3.4134	98726000	-4.0016	-4.08819	-1.99385	-2.36879	-4.92262	-4.17029	-2.92331	-3.09362	-3.01039	-3.9833	-4.60923	-3.89883	-3.7111	-2.66856	-2.9007	-3.14662	-4.87669	-2.89016	-3.44408	-4.15231	-3.1647	-3.06227	-4.76238	-2.92636	-3.16291	-4.67678	-3.50437	-4.13462	-2.67582	-2.61493	-3.49248	-5.0461	-4.67433	-4.12882
[truncated: 164 more rows]
[truncated: 231 more columns]

## Sheet: Non-Kinases_Imputed
Protein IDs	Majority protein IDs	Protein names	Gene names	GOBP name	GOMF name	GOCC name	Pfam	Peptides	Unique peptides	Sequence coverage [%]	Unique sequence coverage [%]	Mol. weight [kDa]	Q-value	Score	Intensity	# Of Cases LFQ ratio >2 at 50 µM Competitior Conc.	Log2 transformed and normalized MaxQuant protein intensity values for protein and lipid kinases identified in the dataset. Normalization was performed by substracting the median of each data column (entire dataset with kinases and non-kinases) from each value in that column.
[truncated: 242 more rows]
[truncated: 232 more columns]

## Sheet: 32-Kinase_Correlation_Analysis
Pearson's r valueas were calculated from the log2 LFQ ratios (n = 39) for all possible pairs of the 32 protein and lipid kinases that interacted with at least 3 out of 39 inhibitor.
[truncated: 33 more rows]
